# Supplementary material for: Engineered ketoreductase-catalyzed stereoselective reduction of ethyl 2′-ketopantothenate and its analogues: chemoenzymatic synthesis of d-pantothenic acid
Source: Royal Society of Chemistry journal article supplement (doi:10.1039/d3gc04344d), 2024-01-01
Supplement: d3gc04344d1.pdf [file d3gc04344d1.pdf]

## Supporting Information Appendix

### Engineered Ketoreductase-Catalyzed Stereoselective Reduction of Ethyl 2'-Ketopantothenate and Its Analogues: Chemoenzymatic Synthesis of D-Pantothenic Acid

Pan Hu,<sup>1</sup> Xiaofan Wu,<sup>2,3</sup> Yajiao Zhang,<sup>2,3</sup> Minjie Liu,<sup>2,3</sup> Yuan Tao,<sup>2,3</sup> Zedu Huang,<sup>2,3\*</sup> and Fener Chen<sup>1,2,3,4\*</sup>

<sup>1</sup>Key Laboratory of Green Chemical Engineering Process of Ministry of Education, School of Chemical Engineering and Pharmacy, Wuhan Institute of Technology, Wuhan, 430205, P. R. China  
E-mail: rfchen@fudan.edu.cn

<sup>2</sup>Department of Chemistry, Engineering Center of Catalysis and Synthesis for Chiral Molecules, Fudan University, 220 Handan Road, Shanghai, 200433, P. R. China  
E-mail: huangzedu@fudan.edu.cn

<sup>3</sup>Shanghai Engineering Research Center of Industrial Asymmetric Catalysis of Chiral Drugs, 220 Handan Road, Shanghai, 200433, P. R. China

<sup>4</sup>College of Chemistry and Chemical Engineering, Jiangxi Normal University, Nanchang, 330022, P. R. China

\*Authors to whom correspondence should be addressed

|                                                                                                                                                                   |      |
|-------------------------------------------------------------------------------------------------------------------------------------------------------------------|------|
| Table of Contents .....                                                                                                                                           | S-2  |
| Table S1. The details of genes used in this study .....                                                                                                           | S-3  |
| Nucleotide and amino acid sequences of SSCR .....                                                                                                                 | S-4  |
| Nucleotide and amino acid sequences of M3.....                                                                                                                    | S-5  |
| Figure S1. SDS-PAGE analysis of N-terminal-His <sub>6</sub> -SSCR and mutants after IMAC purification. ....                                                       | S-6  |
| Figure S2. SDS-PAGE analysis of cell-free extracts of recombinant <i>E. coli</i> strains coexpressing M3 and GDH. ....                                            | S-6  |
| Table S2. Screening of KREDs for the stereoselective reduction of K-PaOEt (1a) .....                                                                              | S-7  |
| Figure S3. Selected amino acid residues within 5 Å of the docked substrate K-PaOEt (1a). ....                                                                     | S-8  |
| Figure S4. Double mutant-catalyzed reduction of K-PaOEt (1a) to ( <i>R</i> )-PaOEt (( <i>R</i> )-2a). ....                                                        | S-9  |
| Figure S5. Dependence of the activity of SSCR and its mutants on the concentration of K-PaOEt (1a) .....                                                          | S-10 |
| Table S3. Genetic construction of recombinant <i>E. coli</i> strains .....                                                                                        | S-11 |
| Figure S6. Reaction condition optimization for the reduction of K-PaOEt (1a) to ( <i>R</i> )-PaOEt (( <i>R</i> )-2a). ....                                        | S-12 |
| Table S4. Calculation of E-factor for recombinant strain <i>E. coli</i> (pET28a-M3/pACYCDuet-1-GDH)-catalyzed synthesis of ( <i>R</i> )-PaOEt at gram-scale ..... | S-13 |
| Table S5. Primers used for the mutagenesis study .....                                                                                                            | S-14 |
| Scheme S1. Synthesis of KPL. ....                                                                                                                                 | S-17 |
| Scheme S2. Synthesis of compound 1a .....                                                                                                                         | S-17 |
| Scheme S3. General procedure for the synthesis of compounds 1. ....                                                                                               | S-18 |
| Scheme S4. <i>E. coli</i> (pET28a-M3/pACYCDuet-1-GDH)-catalyzed stereoselective synthesis of 2. ....                                                              | S-22 |
| Scheme S5. Synthesis of compounds 2c or 2k using ( <i>R</i> )-PL. ....                                                                                            | S-26 |
| References .....                                                                                                                                                  | S-27 |
| <sup>1</sup> H NMR and <sup>13</sup> C NMR Spectra .....                                                                                                          | S-28 |
| Chiral HPLC Spectra .....                                                                                                                                         | S-51 |

**Table S1. The details of genes used in this study**

| <b>Name</b>      | <b>Accession No.</b> | <b>Source</b>                                 | <b>aa</b> |
|------------------|----------------------|-----------------------------------------------|-----------|
| KdoADH           | CDO95209.1           | <i>Kluyveromyces dobzhanskii</i>              | 342       |
| YGL039w          | NP_011476            | <i>Saccharomyces cerevisiae</i>               | 348       |
| CgKR2            | XP_448118.1          | <i>Candida glabrata</i>                       | 311       |
| LtCR             | XP_002554048.1       | <i>Lachancea thermotolerans</i>               | 281       |
| YDR541c          | AAB64983.1           | <i>Saccharomyces cerevisiae</i>               | 344       |
| BYueD            | WP_134982026.1       | <i>Bacillus subtilis</i>                      | 243       |
| RasADH           | EU485985             | <i>Ralstonia sp.</i> DSMZ 6428                | 250       |
| <i>Ch</i> KRED20 | AHC30841.1           | <i>Chryseobacterium sp.</i> CA49              | 244       |
| YDL124w          | NP_010159.1          | <i>Saccharomyces cerevisiae</i>               | 312       |
| KmCR2            | XP_022675166.1       | <i>Kluyveromyces marxianus</i> CBS4857        | 341       |
| PkADH            | WP_114811150.1       | <i>Paraburkholderia kururiensis</i>           | 251       |
| KRED-SL-10       | WP_131435658.1       | <i>Exiguobacterium sp.</i> SL-10              | 248       |
| KRED-F42         | WP_023468191.1       | <i>Exiguobacterium sp.</i> MH3                | 249       |
| SSCR             | Q9UUN9.3             | <i>Sporobolomyces salmonicolor</i><br>AKU4429 | 343       |
| KRED-Bt          | WP_103592444.1       | <i>Bacillus thuringiensis</i>                 | 253       |

**Nucleotide sequence of SSCR (synthetic gene, codon optimized for expression in *E. coli*)**

ATGGCCAAAATCGATAACGCAGTGCTGCCGGAAGGCTCTTTAGTTCTGGTGACCG  
GTGCCAATGGTTTTGTGGCCAGCCATGTGGTTGAGCAGCTGCTGGAGCATGGTTAT  
AAAGTGCGCGGTACCGCCCGCAGTGCCAGCAAACCTGGCCAACTTACAGAAACGC  
TGGGATGCCAAGTATCCGGGTGCTTCGAAACCGCCGTGGTGGAAAGACATGCTGA  
AACAAGGTGCCTACGATGAGGTGATTAAAGGTGCCGCCGGTGTGGCCCATATCGC  
AAGCGTGGTGAGCTTTAGTAATAAATACGATGAAGTTGTGACCCCCGCTATCGGTG  
GCACTTTAAATGCACTGCGCGCAGCAGCAGCAACCCCGAGCGTTAAGCGCTTCGT  
GCTGACAAGTAGTACCGTGAGCGCCTTAATTCGAAGCCGAATGTGGAGGGCATT  
TATCTGGACGAGAAAAGCTGGAATTTAGAGAGCATTGACAAAGCCAAAACCTTAC  
CGGAGAGCGATCCGCAGAAATCTTTATGGGTGTACGCCGCCAGTAAAACCGAGGC  
AGAACTGGCCGCATGGAAATTTATGGATGAAAACAAACCGCATTTTACTTTAAACG  
CCGTGCTGCCGAACCTACACCATCGGCACCATTTTCGATCCGGAAACCCAGAGCGG  
CAGCACAAGCGGTTGGATGATGTCTTTATTCAACGGTGAAGTGAGCCCGGCCTTAG  
CTTTAATGCCTCCGCAGTACTATGTTAGCGCCGTGGATATTGGTTTACTGCATTTAG  
GTTGTTTAGTGCTGCCGCAGATTGAACGTGCTCGCGTGTATGGCACAGCCGGCACC  
TTTGATTGGAATACCGTGCTGGCCACCTTTCGCAAACCTGTATCCGAGCAAACCTT  
CCCGGCCGATTTCCGGACCAAGGTCAAGATCTGAGCAAATTCGATACCGCCCCGT  
CTTTAGAAATTCTGAAGAGCTTAGGCCGTCCGGGCTGGCGCAGCATTGAAGAAAG  
TATTAAGATCTGGTTGGTAGCGAAACCGCCTAA

**Amino acid sequence of SSCR**

MAKIDNAVLPEGSLVLVTGANGFVASHVVEQLLEHGYKVRGTARSASKLANLQKRW  
DAKYPGRFETAVVEDMLKQGAYDEVIKGAAGVAHIASVVSFSNKYDEVVTPAIGGTL  
NALRAAAATPSVKRFVLTSSSTVSALIPKPNVEGIYLDEKSWNLESIDKAKTLPESDPQK  
SLWVYAASKTEAELAAWKFMNDENKPHFTLNAVLPNYTIGTIFDPETQSGSTSGWMMS  
LFNGEVSPALALMPPQYYVSAVDIGLLHLGCLVLPQIERRRVYGTAGTFDWNTVLATF  
RKLYPSKTFPADFPDQGDLSKFDTAPSLEILKSLGRPGWRSIEESIKDLVGSETA

**Amino acid sequence of SSCR with a N-terminal-His<sub>6</sub>-tag**

MGSSHHHHHSSGLVPRGSHMAKIDNAVLPEGSLVLVTGANGFVASHVVEQLLEHGY  
KVRGTARSASKLANLQKRWDAKYPGRFETAVVEDMLKQGAYDEVIKGAAGVAHIAS  
VVSFSNKYDEVVTPAIGGTLNALRAAAATPSVKRFVLTSSSTVSALIPKPNVEGIYLDEK  
SWNLESIDKAKTLPESDPQKSLWVYAASKTEAELAAWKFMNDENKPHFTLNAVLPNYT  
IGTIFDPETQSGSTSGWMMSLFNGEVSPALALMPPQYYVSAVDIGLLHLGCLVLPQIER  
RRVYGTAGTFDWNTVLATFRKLYPSKTFPADFPDQGDLSKFDTAPSLEILKSLGRPG  
WRSIEESIKDLVGSETA

### **Nucleotide sequence of M3**

ATGGCCAAAATCGATAACGCAGTGCTGCCGGAAGGCTCTTTAGTTCTGGTGACCG  
GTGCCAATGGTTTTGTGGCCAGCCATGTGGTTGAGCAGCTGCTGGAGCATGGTTAT  
AAAGTGCGCGGTACCGCCCGCAGTGCCAGCAAACCTGGCCAACTTACAGAAACGC  
TGGGATGCCAAGTATCCGGGTGCTTCGAAACCGCCGTGGTGGAAAGACATGCTGA  
AACAAGGTGCCTACGATGAGGTGATTAAAGGTGCCGCCGGTGTGGCCCATATCGC  
AAGCGTGGTGAAGCTTTGAGTAATAAATACGATGAAGTTGTGACCCCCGCTATCGGTG  
GCACTTTAAATGCACTGCGCGCAGCAGCAGCAACCCCGAGCGTTAAGCGCTTCGT  
GCTGACAAGTAGTACCGTGAGCGCCTTAATCCGAAGCCGAATGTGGAGGGCATC  
TATCTGGACGAGAAAAGCTGGAATTTAGAGAGCATTGACAAAGCCAAAACCTTAC  
CGGAGAGCGATCCGCAGAAAATTTTATGGGTGTACGCCGCCAGTAAAACCGAGGC  
AGAACTGGCCGCATGGAAATTTATGGATGAAAACAAACCGCATTTTACTTTAAACG  
CCGTGCTGCCGAACCTACACCATCGGCACCATTTTCGATCCGGAAACCCAGAGCGG  
CAGCACAAGCGGTTGGATGATGTCTTTATTCAACGGTGAAGTGAGCCCGGCCTTAG  
CTTTAATGTTGCCGCAGTACTATGTTAGCGCCGTGGATATTGGTTTACTGCATTTAG  
GTTGTTTAGTGCTGCCGCAGATTGAACGTGCTCGCGTGTATGGCACAGCCGGCACC  
TTTGATTGGAATACCGTGCTGGCCACCTTTCGCAAACCTGTATCCGAGCAAACCTT  
CCCGGCCGATTTCCGGACCAAGGTCAAGATCTGAGCAAATTCGATACCGCCCCGT  
CTTTAGAAATTCTGAAGAGCTTAGGCCGTCCGGGCTGGCGCAGCATTGAAGAAAG  
TATTAAGATCTGGTTGGTAGCGAAACCGCCTAA

### **Amino acid sequence of M3**

MAKIDNAVLPEGSLVLVTGANGFVASHVVEQLLEHGYKVRGTARSASKLANLQKRW  
DAKYPGRFETAVVEDMLKQGAYDEVIKGAAGVAHIASVVSLSNKYDEVVTPAIGGTL  
NALRAAAATPSVKRFVLTSSVTSALIPKPNVEGIYLDEKSWNLESIDKAKTLPESDPQK  
ILWVYAASKTEAELAAWKFM DENKPHFTLNAVLPNYTIGTIFDPETQSGSTSGWMMS  
LFNGEVSPALALMLPQYYVSAVDIGLLHLGCLVLPQIERRRVYGTAGTFDWNTVLATF  
RKLYPSKTFPADFPDQGDLSKFD TAPSLEILKSLGRPGWRSIEESIKDLVGSETA

### **Amino acid sequence of M3 with a N-terminal-His<sub>6</sub>-tag**

MGSSHHHHHHSSGLVPRGSHMAKIDNAVLPEGSLVLVTGANGFVASHVVEQLLEHGY  
KVRGTARSASKLANLQKRWDAKYPGRFETAVVEDMLKQGAYDEVIKGAAGVAHIAS  
VVSLSNKYDEVVTPAIGGTLNALRAAAATPSVKRFVLTSSVTSALIPKPNVEGIYLDEK  
SWNLESIDKAKTLPESDPQKILWVYAASKTEAELAAWKFM DENKPHFTLNAVLPNYT  
IGTIFDPETQSGSTSGWMMSLFNGEVSPALALMLPQYYVSAVDIGLLHLGCLVLPQIER  
RRVYGTAGTFDWNTVLATFRKLYPSKTFPADFPDQGDLSKFD TAPSLEILKSLGRPG  
WRSIEESIKDLVGSETA

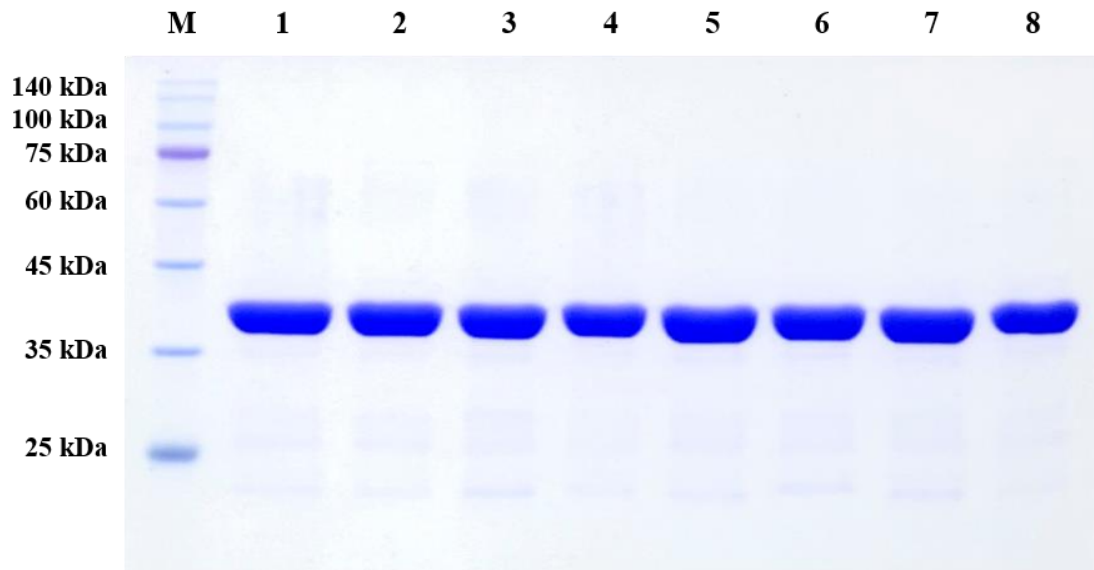

**Figure S1.** SDS-PAGE analysis of N-terminal-His<sub>6</sub>-SSCR and mutants after IMAC purification. Coomassie staining. M: RealBand 3-color Regular Range Protein Marker (Sangon Biotech, China). Lane 1: SSCR. Lane 2: M3. Lane 3: F97L. Lane 4: S173I. Lane 5: P243L. Lane 6: F97L-S173I. Lane 7: F97L-P243L. Lane 8: S173I-P243L.

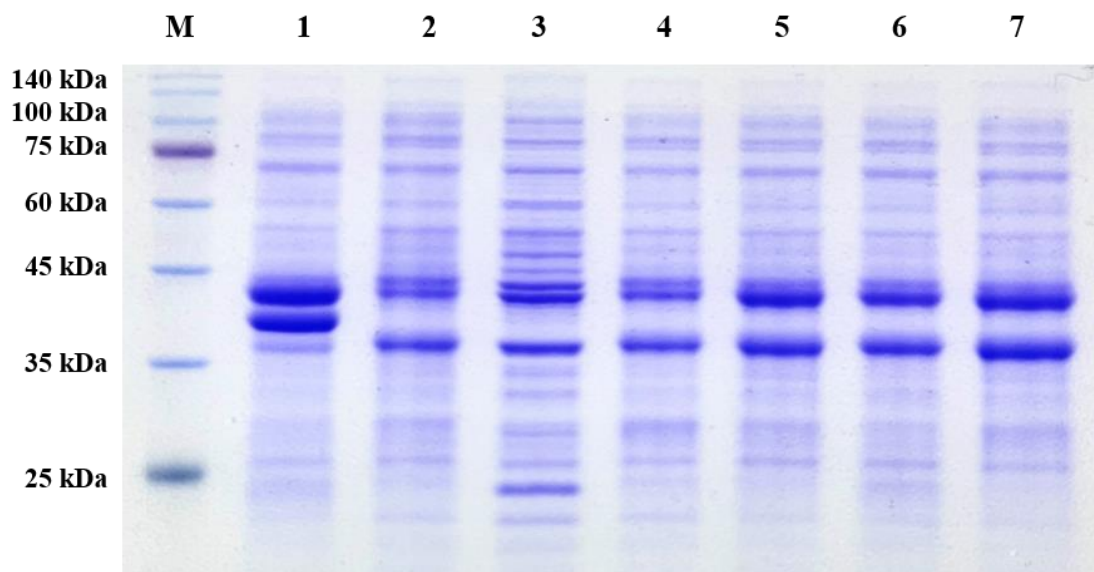

**Figure S2.** SDS-PAGE analysis of cell-free extracts of recombinant *E. coli* strains coexpressing M3 and GDH. M: RealBand 3-color Regular Range Protein Marker (Sangon Biotech, China). Lane 1: *E. coli* (pET28a-M3/pACYCDuet-1-GDH). Lane 2: *E. coli* (pETDuet-1-M3-GDH). Lane 3: *E. coli* (pACYCDuet-1-M3-GDH). Lane 4: *E. coli* (pRSFDuet-1-M3-GDH). Lane 5: *E. coli* (pETDuet-1-GDH-M3). Lane 6: *E. coli* (pACYCDuet-1-GDH-M3). Lane 7: *E. coli* (pRSFDuet-1-GDH-M3).

**Table S2. Screening of KREDs for the stereoselective reduction of K-PaOEt (1a)<sup>a</sup>**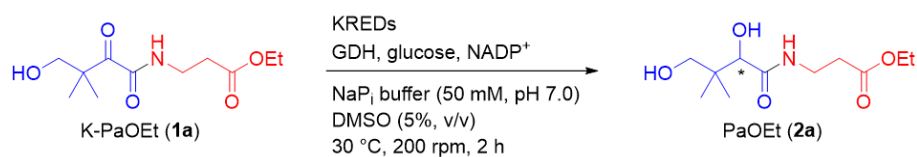

| Entry | Enzyme           | Conv. (%) <sup>b</sup> | Ee (%) <sup>c</sup> |
|-------|------------------|------------------------|---------------------|
| 1     | KdoADH           | 45                     | 66 ( <i>S</i> )     |
| 2     | YGL039w          | 8                      | 20 ( <i>R</i> )     |
| 3     | CgKR2            | <5                     | n.d. <sup>d</sup>   |
| 4     | LtCR             | <5                     | n.d.                |
| 5     | YDR541c          | <5                     | n.d.                |
| 6     | BYueD            | <5                     | n.d.                |
| 7     | RasADH           | 97                     | 96 ( <i>S</i> )     |
| 8     | <i>Ch</i> KRED20 | 73                     | 62 ( <i>S</i> )     |
| 9     | YDL124w          | <5                     | n.d.                |
| 10    | KmCR2            | 89                     | 24 ( <i>R</i> )     |
| 11    | PkADH            | 7                      | 94 ( <i>R</i> )     |
| 12    | KRED-SL-10       | 5                      | 86 ( <i>R</i> )     |
| 13    | KRED-F42         | <5                     | n.d.                |
| 14    | SSCR             | >99                    | >99 ( <i>R</i> )    |
| 15    | KRED-Bt          | <5                     | n.d.                |

<sup>a</sup>Reaction conditions (3 mL): **1a** (50 mM), glucose (100 mM), NADP<sup>+</sup> (1 mM), DMSO (5%, v/v), 50 g/L cell-free extract (CFE) (wet cell weight) of KREDs, and 75 g/L CFE (wet cell weight) of GDH in NaPi buffer (100 mM, pH 7.0). Reaction mixtures in the Eppendorf tubes were shaken in a temperature-controlled orbital shaker at 30 °C and 200 rpm for 2 h. <sup>b</sup>The conversion was determined by <sup>1</sup>H NMR analysis. <sup>c</sup>The ee was determined by chiral HPLC analysis upon benzoylation of the product, and the absolute configuration of the product was assigned by comparing the optical rotation data to literature data. <sup>d</sup>n.d.: not determined.

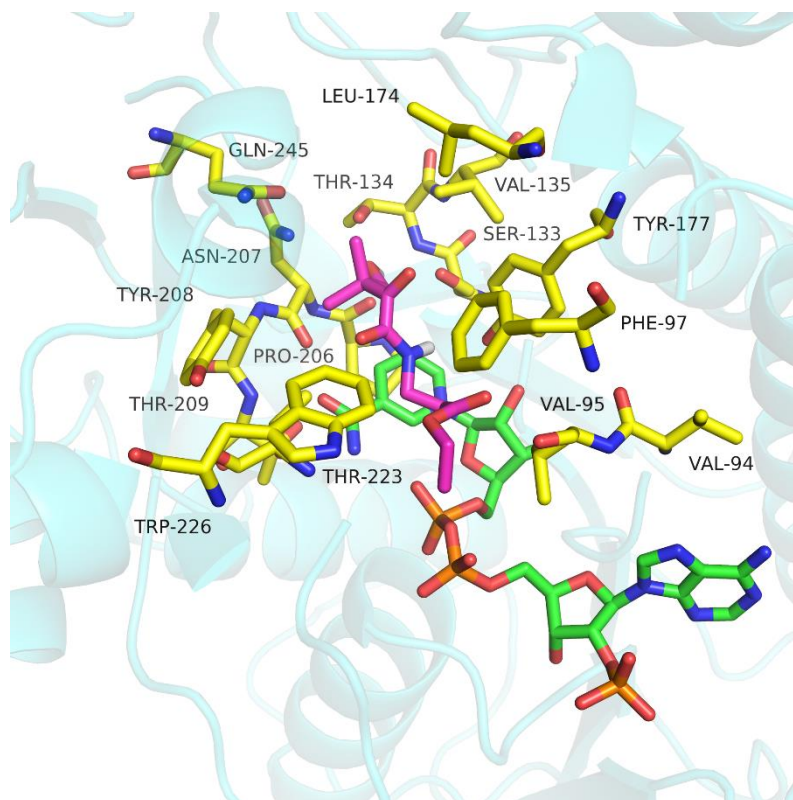

**Figure S3.** Selected amino acid residues within 5 Å of the docked substrate K-PaOEt (**1a**).



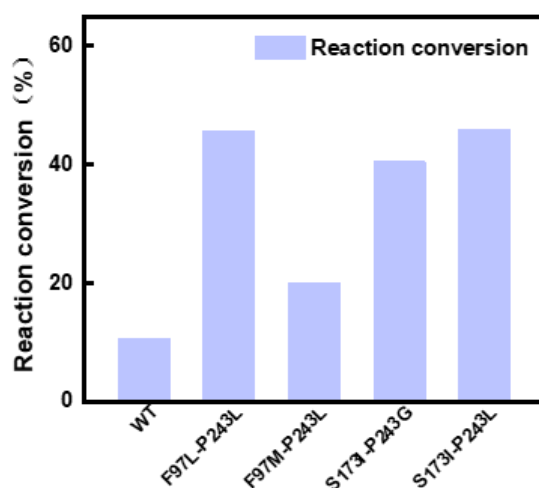

**Figure S4.** Double mutant-catalyzed reduction of K-PaOEt (**1a**) to (*R*)-PaOEt (*(R)*-**2a**). Reaction conditions (3 mL): **1a** (50 mM), glucose (100 mM), NADP<sup>+</sup> (1 mM), DMSO (5%, v/v), 0.17 g/L cell-free extract (CFE) (wet cell weight) of KREDs, and 75 g/L CFE (wet cell weight) of GDH in NaP<sub>i</sub> buffer (100 mM, pH 7.0). Reaction mixtures in the Eppendorf tubes were shaken in a temperature-controlled orbital shaker at 30 °C and 200 rpm for 1 h.

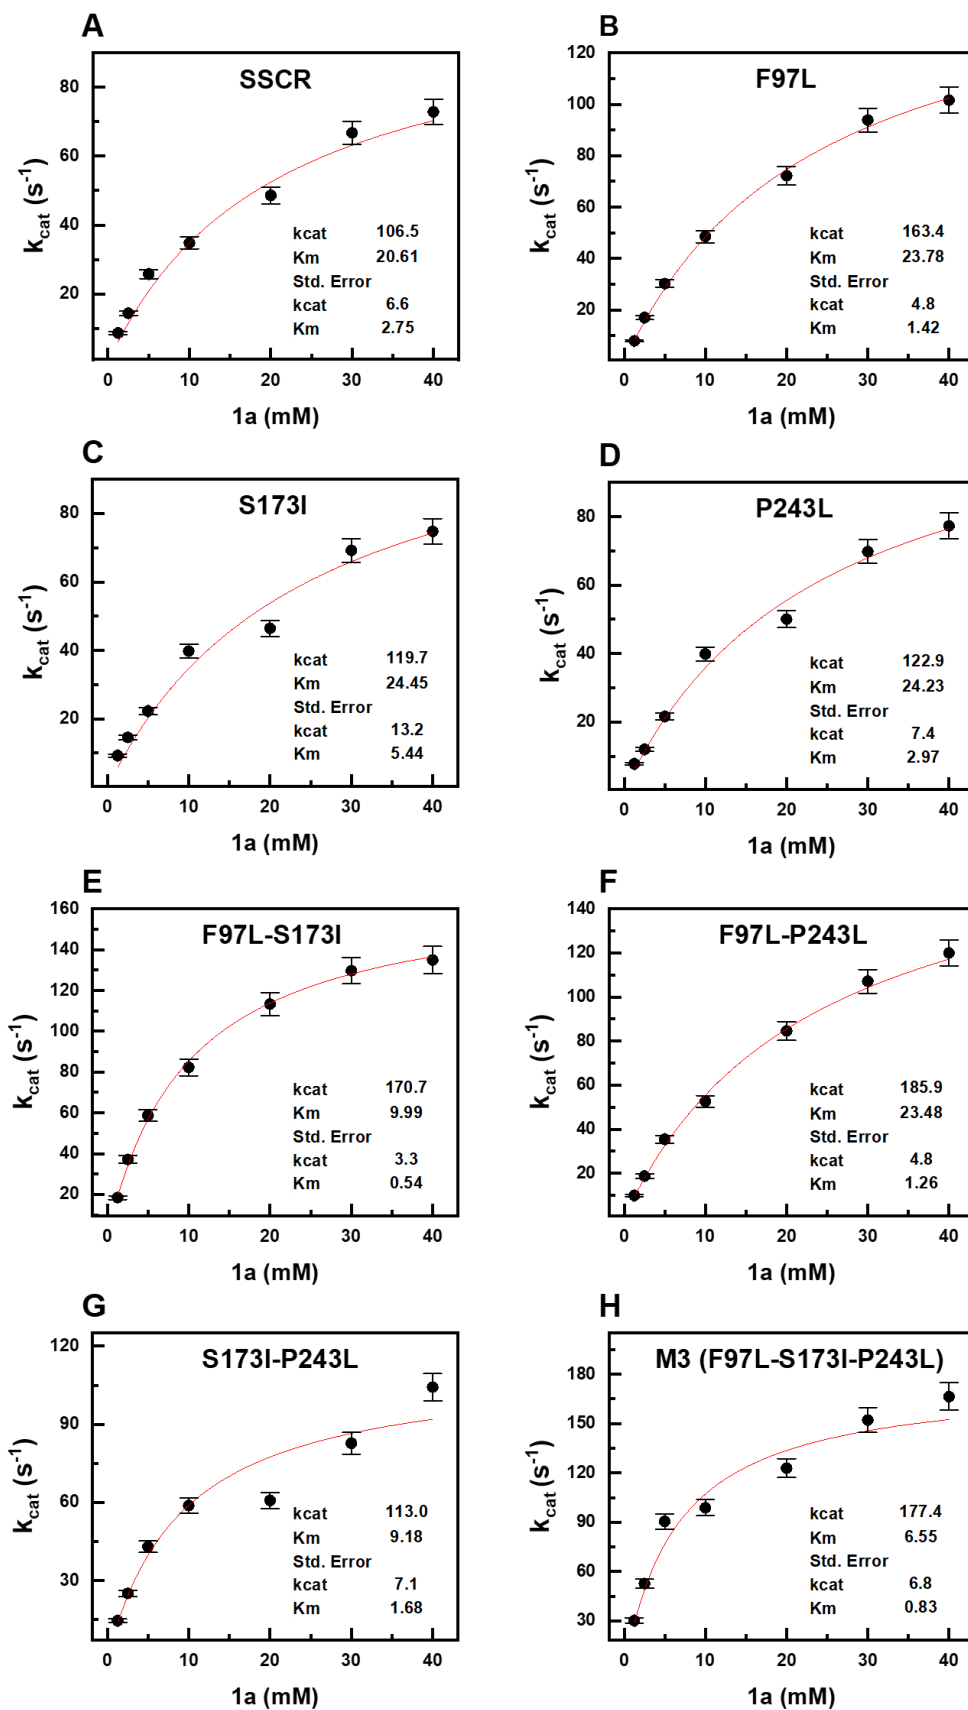

**Figure S5.** Dependence of the activity of SSCR and its mutants on the concentration of K-PaOEt (**1a**).

**Table S3. Genetic construction of recombinant *E. coli* strains**

| Entry | Recombinant <i>E. coli</i> strains                | Plasmids                                |
|-------|---------------------------------------------------|-----------------------------------------|
| 1     | <i>E. coli</i><br>(pET28a-M3/<br>pACYCDuet-1-GDH) | <p>pET28a-M3</p> <p>pACYCDuet-1-GDH</p> |
| 2     | <i>E. coli</i><br>(pACYCDuet-1-M3-GDH)            | <p>pACYCDuet-1-M3-GDH</p>               |
| 3     | <i>E. coli</i><br>(pACYCDuet-1-GDH-M3)            | <p>pACYCDuet-1-GDH-M3</p>               |
| 4     | <i>E. coli</i><br>(pETDuet-1-M3-GDH)              | <p>pETDuet-1-M3-GDH</p>                 |
| 5     | <i>E. coli</i><br>(pETDuet-1-GDH-M3)              | <p>pETDuet-1-GDH-M3</p>                 |
| 6     | <i>E. coli</i><br>(pRSFDuet-1-M3-GDH)             | <p>pRSFDuet-1-M3-GDH</p>                |
| 7     | <i>E. coli</i><br>(pRSFDuet-1-GDH-M3)             | <p>pRSFDuet-1-GDH-M3</p>                |

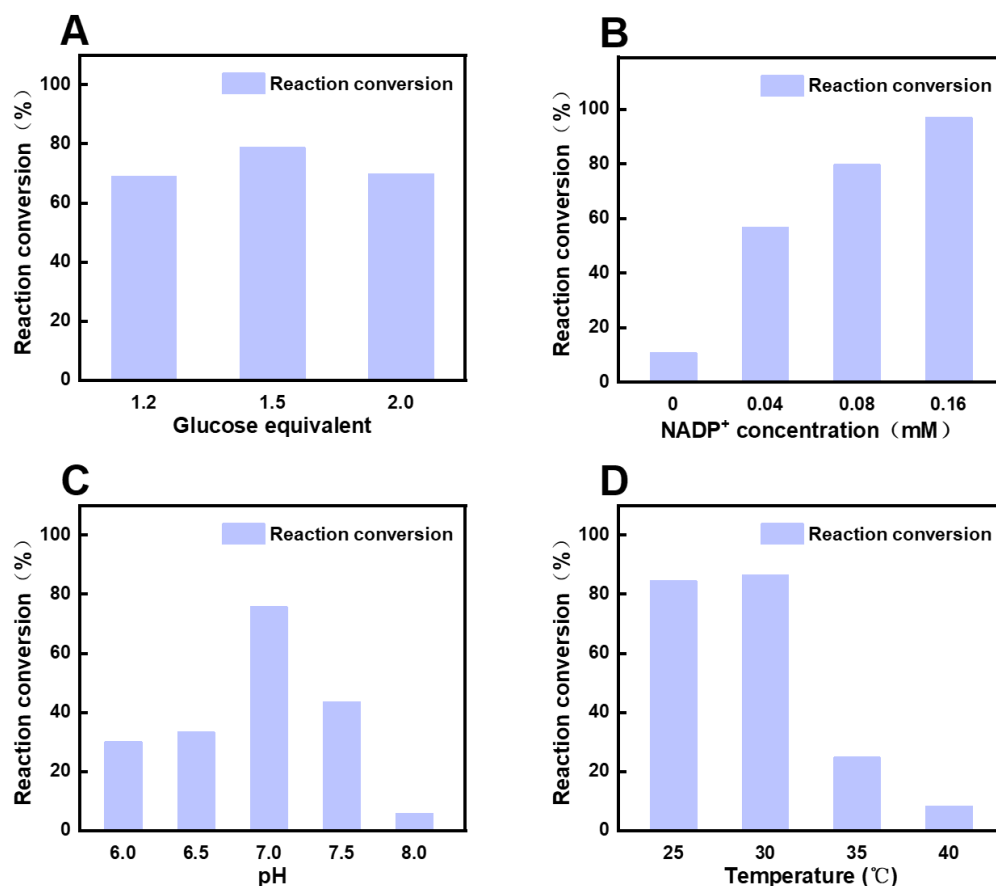

**Figure S6.** Reaction condition optimization for the reduction of K-PaOEt (**1a**) to (*R*)-PaOEt (*(R)*-**2a**). (A) Glucose concentration. Reaction conditions (5 mL): **1a** (100 g/L), glucose (variable amounts), NADP<sup>+</sup> (0.08 mM), toluene (10%, v/v), wet cells of recombinant *E. coli* strains (0.1 g, 20 g/L) in NaP<sub>i</sub> buffer (100 mM, pH 7.0). Reaction mixtures in the round-bottom flasks were stirred in a metal heating block at 30 °C and 1500 rpm for 3 h. (B) NADP<sup>+</sup> concentration. Reaction conditions (5 mL): **1a** (100 g/L), glucose (1.5 equiv.), NADP<sup>+</sup> (variable amounts), toluene (10%, v/v), wet cells of recombinant *E. coli* strains (0.1 g, 20 g/L) in NaP<sub>i</sub> buffer (100 mM, pH 7.0). Reaction mixtures in the round-bottom flasks were stirred in a metal heating block at 30 °C and 1500 rpm for 3 h. (C) pH. Reaction conditions (5 mL): **1a** (100 g/L), glucose (1.5 equiv.), NADP<sup>+</sup> (0.08 mM), toluene (10%, v/v), wet cells of recombinant *E. coli* strains (0.1 g, 20 g/L) in 100 mM NaP<sub>i</sub> buffers of different pHs (6.0-8.0). Reaction mixtures in the round-bottom flasks were stirred in a metal heating block at 30 °C and 1500 rpm for 3 h. (D) Temperature. Reaction conditions (5 mL): **1a** (100 g/L), glucose (1.5 equiv.), NADP<sup>+</sup> (0.08 mM), toluene (10%, v/v), wet cells of recombinant *E. coli* strains (0.1 g, 20 g/L) in NaP<sub>i</sub> buffer (100 mM, pH 7.0). Reaction mixtures in the round-bottom flasks were stirred in a metal heating block at different temperatures (25-40 °C) and 1500 rpm for 3 h.

**Table S4. Calculation of E-factor for recombinant strain *E. coli* (pET28a-M3/pACYCDuet-1-GDH)-catalyzed synthesis of (*R*)-PaOEt at gram-scale<sup>a</sup>**

|                 | <b>Compound</b>                                            | <b>Weight (g)</b> |
|-----------------|------------------------------------------------------------|-------------------|
| <b>Product</b>  | ( <i>R</i> )-PaOEt                                         | 1.3               |
| <b>Input</b>    | substrate                                                  | 1.5               |
|                 | glucose                                                    | 1.83              |
|                 | <i>E. coli</i> cells<br>(corresponding to dry cell weight) | 0.11              |
|                 | salt in 100 mM PBS (pH 7.0)                                | 13.5 mL, 0.162 g  |
|                 | toluene                                                    | 1.5 mL, 1.308 g   |
|                 | NADP <sup>+</sup>                                          | 0.0009 g          |
|                 | silica gel                                                 | 5                 |
|                 | DCM                                                        | 53                |
|                 | H <sub>2</sub> O                                           | 13.5              |
| <b>Waste</b>    | Including water                                            | 75.11             |
|                 | Excluding water                                            | 61.61             |
| <b>E-factor</b> | Including water                                            | 57.78             |
|                 | Excluding water                                            | 47.39             |

<sup>a</sup>100 g/L substrate, 15 mL reaction scale.

**Table S5. Primers used for the mutagenesis study**

| Name        | Sequence (5'→3')                   |
|-------------|------------------------------------|
| V94A-F      | TATCGCAAGCGCGGTGAGCTTTAGTAATAAAT   |
| V94A-R      | TAAAGCTCACCGCGCTTGCGATATGGGCCACAC  |
| V95A-F      | CGCAAGCGTGGCGAGCTTTAGTAATAAATACG   |
| V95A-R      | TACTAAAGCTCGCCACGCTTGCGATATGGGCC   |
| F97A-F      | CGTGGTGAGCGCTAGTAATAAATACGATGAAGT  |
| F97A-R      | ATTTATTACTAGCGCTCACCACGCTTGCGATAT  |
| T134A-F     | GACAAGTAGTGCCGTGAGCGCCTTAATTCGAAG  |
| T134A-R     | AGGCGCTCACGGCACTACTTGTGAGCAGCAAGC  |
| V135A-F     | AAGTAGTACCGCGAGCGCCTTAATTCGAAGCC   |
| V135A-R     | TTAAGGCGCTCGCGTACTACTTGTGAGCAGC    |
| S173A-F     | TCCGCAGAAAGCTTTATGGGTGTACGCCGCCAG  |
| S173A-R     | ACACCCATAAAGCTTTCTGCGGATCGCTCTCCG  |
| L174A-F     | GCAGAAATCTGCATGGGTGTACGCCGCCAGT    |
| L174A-R     | CGTACACCCATGCAGATTTCTGCGGATCGCTCT  |
| S180A-F     | GTACGCCGCCGCTAAAACCGAGGCAGAACTGGC  |
| S180A-R     | CCTCGGTTTTAGCGGCGGCGTACACCCATAAAG  |
| P206A-F     | CGCCGTGCTGGCGAACTACACCATCGGCACC    |
| P206A-R     | TGGTGTAGTTCGCCAGCACGGCGTTTAAAGT    |
| N207A-MP -F | CGTGCTGCCGGCCTACACCATCGGCACCATT    |
| N207A-MP-R  | TGGTCCGGAATAATCGGCCGGGAAGGT        |
| Y208A-F     | GCTGCCGAACGCCACCATCGGCACCATTTTCG   |
| Y208A-R     | TGCCGATGGTGGCGTTCGGCAGCACGGCGTT    |
| T209A-F     | GCTGCCGAACGCCACCATCGGCACCATTTTCG   |
| T209A-R     | TGGTGCCGATGGCGTAGTTCGGCAGCACGGCGT  |
| T223A-F     | GAGCGGCAGCGCAAGCGGTTGGATGATGTCTTT  |
| T223A-R     | TCCAACCGCTTGCGCTGCCGCTCTGGGTTCCG   |
| W226A-F     | CACAAGCGGTGCGATGATGTCTTTATTCAACGG  |
| W226A-R     | AAGACATCATCGCACCGCTTGTGCTGCCGCTCT  |
| M242A-F     | CTTAGCTTTAGCGCCTCCGCAGTACTATGTTAG  |
| M242A-R     | ACTGCGGAGGCGCTAAAGCTAAGGCCGGGCTC   |
| P243A-F     | AGCTTTAATGGCTCCGCAGTACTATGTTAGCGC  |
| P243A-R     | AGTACTGCGGAGCCATTAAGCTAAGGCCGGGC   |
| Q245A-F     | AATGCCTCCGGCGTACTATGTTAGCGCCGTGG   |
| Q245A-R     | TAACATAGTACGCCGGAGGCATTAAGCTAAGG   |
| Y246A-F     | GCCTCCGCAGGCCTATGTTAGCGCCGTGGATAT  |
| Y246A-R     | CGCTAACATAGGCCTGCGGAGGCATTAAGCT    |
| F97X-F      | CGTGGTGAGCANNKAGTAATAAATACGATGAAGT |
| F97X-R      | ATTTATTACTMNNNGCTCACCACGCTTGCGATAT |
| S173X-F     | TCCGCAGAAANNKTTATGGGTGTACGCCGCCAG  |
| S173X-R     | ACACCCATAAMNNTTTCTGCGGATCGCTCTCCG  |
| M242X-F     | CTTAGCTTTANNKCCTCCGCAGTACTATGTTAG  |

M242X-R ACTGCGGAGGMNNTAAAGCTAAGGCCGGGCTC  
P243X-MP-F AGCTTTAATGNNKCCGCAGTACTATGTTAGCGC  
P243X-MP-R AGGCGGTTTCGCTACCAACCAGATC  
V135C-F AAGTAGTACCTGTAGCGCCTTAATTCCGAAGCC  
V135C-R TTAAGGCGCTACAGGTACTACTTGTTCAGCACG  
V135D-F AAGTAGTACCGATAGCGCCTTAATTCCGAAGCC  
V135D-R TTAAGGCGCTATCGGTACTACTTGTTCAGCACG  
V135E-F AAGTAGTACCGAGAGCGCCTTAATTCCGAAGCC  
V135E-R TTAAGGCGCTCTCGGTACTACTTGTTCAGCACG  
V135F-F AAGTAGTACCTTTAGCGCCTTAATTCCGAAGCC  
V135F-R TTAAGGCGCTAAAGGTACTACTTGTTCAGCACG  
V135G-F AAGTAGTACCGGGAGCGCCTTAATTCCGAAGCC  
V135G-R TTAAGGCGCTCCCGGTACTACTTGTTCAGCACG  
V135H-F AAGTAGTACCCATAGCGCCTTAATTCCGAAGCC  
V135H-R TTAAGGCGCTATGGGTACTACTTGTTCAGCACG  
V135I-F AAGTAGTACCAATTAGCGCCTTAATTCCGAAGCC  
V135I-R TTAAGGCGCTAATGGTACTACTTGTTCAGCACG  
V135K-F AAGTAGTACCAAGAGCGCCTTAATTCCGAAGCC  
V135K-R TTAAGGCGCTCTTGGTACTACTTGTTCAGCACG  
V135L-F AAGTAGTACCCTGAGCGCCTTAATTCCGAAGCC  
V135L-R TTAAGGCGCTCAGGGTACTACTTGTTCAGCACG  
V135M-F AAGTAGTACCATGAGCGCCTTAATTCCGAAGCC  
V135M-R TTAAGGCGCTCATGGTACTACTTGTTCAGCACG  
V135N-F AAGTAGTACCAACAGCGCCTTAATTCCGAAGCC  
V135N-R TTAAGGCGCTGTTGGTACTACTTGTTCAGCACG  
V135P-F AAGTAGTACCCCGAGCGCCTTAATTCCGAAGCC  
V135P-R TTAAGGCGCTCGGGTACTACTTGTTCAGCACG  
V135Q-F AAGTAGTACCCAGAGCGCCTTAATTCCGAAGCC  
V135Q-R TTAAGGCGCTCTGGGTACTACTTGTTCAGCACG  
V135R-F AAGTAGTACCAGGAGCGCCTTAATTCCGAAGCC  
V135R-R TTAAGGCGCTCCTGGTACTACTTGTTCAGCACG  
V135S-F AAGTAGTACCTCGAGCGCCTTAATTCCGAAGCC  
V135S-R TTAAGGCGCTCGAGGTACTACTTGTTCAGCACG  
V135T-F AAGTAGTACCACGAGCGCCTTAATTCCGAAGCC  
V135T-R TTAAGGCGCTCGTGGTACTACTTGTTCAGCACG  
V135W-F AAGTAGTACCTGGAGCGCCTTAATTCCGAAGCC  
V135W-R TTAAGGCGCTCCAGGTACTACTTGTTCAGCACG  
V135Y-F AAGTAGTACCTATAGCGCCTTAATTCCGAAGCC  
V135Y-R TTAAGGCGCTATAGGTACTACTTGTTCAGCACG  
P243R-F97M-F CGTGGTGAGCATGAGTAATAAATACGATGAAGT  
P243R-F97M-R ATTTATTACTCATGCTCACCACGCTTGCGATAT  
P243R-F97L-F CGTGGTGAGCTTGAGTAATAAATACGATGAAGT  
P243R-F97L-R ATTTATTACTCAAGCTCACCACGCTTGCGATAT  
P243R-S173I-F TCCGCAGAAAATTTTATGGGTGTACGCCGCCAG

|               |                                                          |
|---------------|----------------------------------------------------------|
| P243R-S173I-R | ACACCCATAAAATTTTCTGCGGATCGCTCTCCG                        |
| F1            | TTAACTTTAAGAAGGAGATATACCATGGCAACTGAAC<br>AGAAAGCCATTG    |
| R1            | CTGCAGGCGCGCCGAGCTCGAATTCTCACTGCCACTTT<br>ATCACCGTCT     |
| F2            | TTAAGTATAAGAAGGAGATATACATATGGCCAAAATCGA<br>TAACGCAGTGC   |
| R2            | CAGCGGTTTCTTTACCAGACTCGAGTTAGGCGGTTTCG<br>CTACCAACCAG    |
| F3            | TTAACTTTAATAAGGAGATATACCATGGCAACTGAACA<br>GAAAGCCATTGT   |
| R3            | CTGCAGGCGCGCCGAGCTCGAATTCTCACTGCCACTTT<br>ATCACCGTCTTTAT |
| F4            | TTAAGTATAAGAAGGAGATATACATATGGCAACTGAAC<br>AGAAAGCCATTG   |
| R4            | CAGCGGTTTCTTTACCAGACTCGAGTCACTGCCACTTT<br>ATCACCGTCTT    |
| F5            | TTAACTTTAAGAAGGAGATATACCATGGCCAAAATCG<br>ATAACGCAGTGC    |
| R5            | CTGCAGGCGCGCCGAGCTCGAATTCTTAGGCGGTTTCG<br>CTACCAACCAG    |
| F6            | TTAACTTTAATAAGGAGATATACCATGGCCAAAATCGA<br>TAACGCAGTGC    |
| R6            | CTGCAGGCGCGCCGAGCTCGAATTCTTAGGCGGTTTCG<br>CTACCAACCAG    |

---



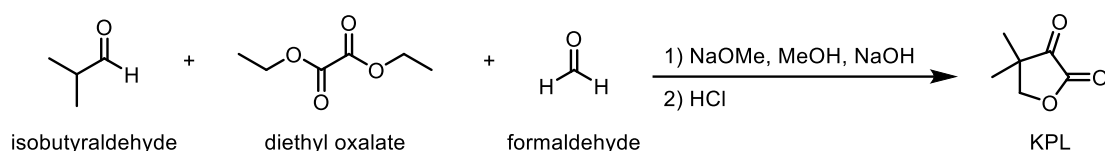

**Scheme S1.** Synthesis of KPL.<sup>[1]</sup>

This is a modified literature procedure.<sup>[1]</sup> To a mixture of 30% methanolic NaOMe (74 g, 0.41 mol, 1.2 equiv.) and diethyl oxalate (50 g, 0.34 mol, 1.0 equiv.) was added isobutyraldehyde (27.1 g, 0.38 mol, 1.1 equiv.) at 0 °C, and then the mixture was stirred for 1 h at the same temperature. Then 37% HCHO solution (28.1 g, 0.35 mol, 1.02 equiv.) was added, and the mixture was stirred for another hour at 0°C. 40% NaOH solution (51 g, 0.51 mol, 1.5 equiv.) was added at 0 °C. After stirring for 1 h, conc. HCl (75 mL) was added and the stirring continued for another hour. Upon adjusting the pH to 3 with 40% NaOH solution, NaCl formed was filtered off, and the filtrate was evaporated to remove MeOH. The residual aqueous solution was extracted with EtOAc. The combined organic layer is dried with Na<sub>2</sub>SO<sub>4</sub> and evaporated to give the crude product, which was washed with MTBE to afford KPL as white solid in 83% yield. The characterization data of thus synthesized KPL matched well with that reported in literature.

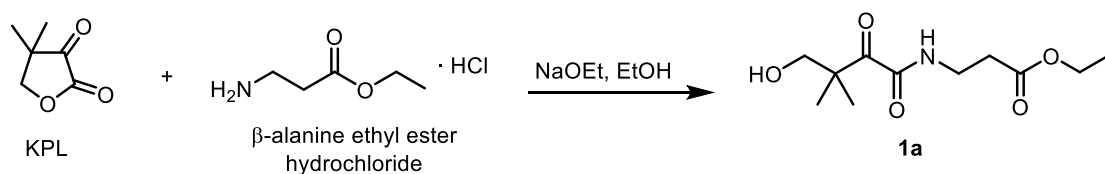

**Scheme S2.** Synthesis of compound **1a**.

A mixture of NaOEt (4.7 g, 69 mmol, 1.06 equiv.),  $\beta$ -alanine ethyl ester hydrochloride (10.6 g, 69 mmol, 1.06 equiv.), and KPL (8.4 g, 65 mmol) in anhydrous EtOH (190 mL) was stirred overnight at room temperature. Ethanol was removed, and the mixture was dissolved in water, extracted with EtOAc. The organic layer was washed with brine, dried with Na<sub>2</sub>SO<sub>4</sub>, and concentrated *in vacuo*. The residue was purified by column chromatography (PE/EA = 5:1) to afford **1a** as colorless oil (10 g, 40 mmol, 62%).

#### Ethyl 3-(4-hydroxy-3,3-dimethyl-2-oxobutanamido)propanoate

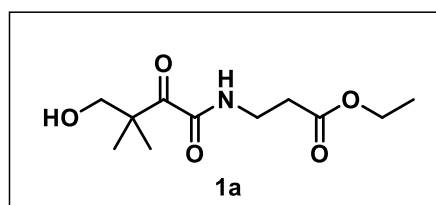

R<sub>f</sub> = 0.6 (PE/EA = 2:1). <sup>1</sup>H NMR (400 MHz, CDCl<sub>3</sub>)  $\delta$  7.57 (s, 1H), 4.17 (q, *J* = 7.1 Hz, 2H), 3.76 (s, 2H), 3.57 (q, *J* = 6.3 Hz, 2H), 2.59 (t, *J* = 6.3 Hz, 2H), 1.28 (t, *J* = 7.5 Hz, 3H), 1.27 (s, 6H). <sup>13</sup>C NMR (100 MHz, CDCl<sub>3</sub>)  $\delta$  202.3, 172.0, 161.0, 68.9, 61.0, 48.9, 34.7, 33.6, 21.4, 14.2. HRMS (ESI, *m/z*) calcd for C<sub>11</sub>H<sub>19</sub>NO<sub>5</sub>Na [M + Na]<sup>+</sup> 268.1155, found 268.1156.

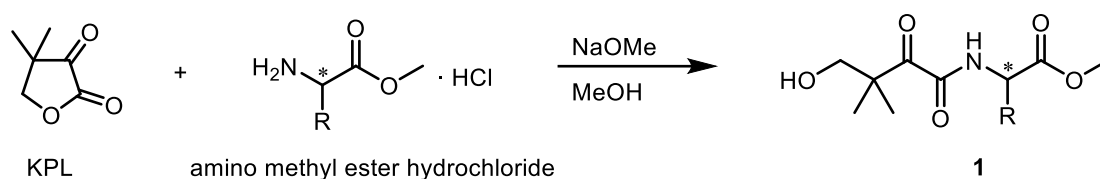

**Scheme S3.** General procedure for the synthesis of compounds **1**.

A mixture of NaOMe (1.1 equiv.), amino methyl ester hydrochloride (1.05 equiv.), and KPL (20 mmol, 1.0 equiv.) in anhydrous MeOH (40 mL) was stirred overnight at room temperature. Methanol was removed, and the mixture was dissolved in water, extracted with EtOAc. The organic layer was washed with brine, dried with Na<sub>2</sub>SO<sub>4</sub>, and concentrated *in vacuo*. The residue was purified by column chromatography to afford **1**.

#### Methyl (4-hydroxy-3,3-dimethyl-2-oxobutanoyl) glycinate

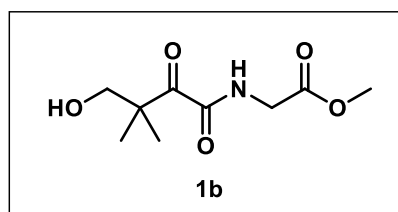

Compound **1b** was prepared and purified in 73% yield (3.2 g, 14.7 mmol) as yellow solid via column chromatography (5/1 PE/EA), starting from 20 mmol of KPL. *R*<sub>f</sub> = 0.5 (PE/EA = 1:1). m.p. = 45.0-47.3 °C. <sup>1</sup>H NMR (400 MHz, CDCl<sub>3</sub>) δ 7.44 (s, 1H), 4.09 (d, *J* = 5.7 Hz, 2H), 3.80 (s, 3H), 3.79 (s, 2H), 1.31 (s, 6H). <sup>13</sup>C NMR (100 MHz, CDCl<sub>3</sub>) δ 201.8, 169.4, 161.0, 69.0, 52.7, 48.9, 40.9, 21.4. HRMS (ESI, *m/z*) calcd for C<sub>9</sub>H<sub>15</sub>NO<sub>5</sub>Na [M + Na]<sup>+</sup> 240.0842, found 240.0842.

#### Methyl (4-hydroxy-3,3-dimethyl-2-oxobutanoyl)-L-alaninate

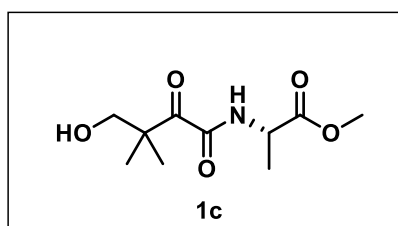

Compound **1c** was prepared and purified in 65% yield (3 g, 12.99 mmol) as colorless oil via column chromatography (4/1 PE/EA), starting from 20 mmol of KPL. *R*<sub>f</sub> = 0.5 (PE/EA = 1:1). <sup>1</sup>H NMR (400 MHz, CDCl<sub>3</sub>) δ 7.47 (d, *J* = 8.0 Hz, 1H), 4.51-4.43 (m, 1H), 3.75-3.65 (m, 5H), 1.40 (d, *J* = 7.3 Hz, 3H), 1.21 (s, 6H). <sup>13</sup>C NMR (100 MHz, CDCl<sub>3</sub>) δ 202.2, 172.5, 160.8, 68.9, 52.7, 48.9, 47.9, 21.4, 21.3, 17.7. HRMS (ESI, *m/z*) calcd for C<sub>10</sub>H<sub>17</sub>NO<sub>5</sub> [M + H]<sup>+</sup> 232.1179, found 232.1177.

### Methyl (4-hydroxy-3,3-dimethyl-2-oxobutanoyl)-L-valinate

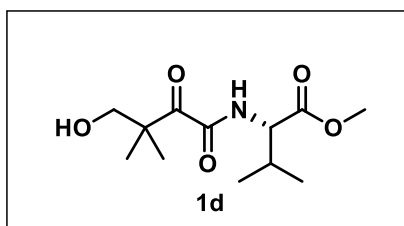

Compound **1d** was prepared and purified in 58% yield (3 g, 11.58 mmol) as colorless oil via column chromatography (5/1 PE/EA), starting from 20 mmol of KPL.  $R_f = 0.6$  (PE/EA = 2:1).  $^1\text{H NMR}$  (400 MHz,  $\text{CDCl}_3$ )  $\delta$  7.39 (d,  $J = 9.2$  Hz, 1H), 4.45 (dd,  $J = 9.0, 5.0$  Hz, 1H), 3.74 (s, 3H), 3.73 (s, 2H), 2.20 (td,  $J = 6.9, 5.0$  Hz, 1H), 1.26 (s, 6H), 0.93 (d,  $J = 6.8$  Hz, 3H), 0.90 (d,  $J = 6.9$  Hz, 3H).  $^{13}\text{C NMR}$  (100 MHz,  $\text{CDCl}_3$ )  $\delta$  202.2, 171.4, 160.9, 68.9, 57.1, 52.4, 48.9, 31.2, 21.4, 21.3, 19.0, 17.7. HRMS (ESI,  $m/z$ ) calcd for  $\text{C}_{12}\text{H}_{21}\text{NO}_5$   $[\text{M} + \text{H}]^+$  260.1492, found 260.1487.

### Methyl (4-hydroxy-3,3-dimethyl-2-oxobutanoyl)-L-leucinate

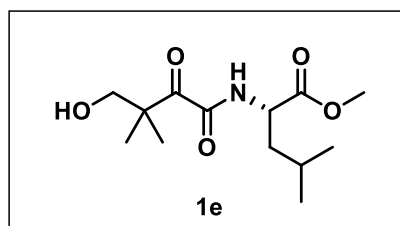

Compound **1e** was prepared and purified in 73% yield (4.0 g, 14.7 mmol) as colorless oil via column chromatography (5/1 PE/EA), starting from 20 mmol of KPL.  $R_f = 0.7$  (PE/EA = 2:1).  $^1\text{H NMR}$  (400 MHz,  $\text{CDCl}_3$ )  $\delta$  7.14 (d,  $J = 8.6$  Hz, 1H), 4.56-4.47 (m, 1H), 3.69 (s, 3H), 3.68 (s, 2H), 3.10 (s, 1H), 1.66-1.60 (m, 1H), 1.59-1.53 (m, 2H), 1.22 (s, 6H), 0.88 (d,  $J = 6.1$  Hz, 6H).  $^{13}\text{C NMR}$  (100 MHz,  $\text{CDCl}_3$ )  $\delta$  202.1, 172.4, 160.7, 69.0, 52.6, 50.7, 48.9, 41.2, 24.9, 22.7, 21.8, 21.43, 21.36. HRMS (ESI,  $m/z$ ) calcd for  $\text{C}_{13}\text{H}_{23}\text{NO}_5$   $[\text{M} + \text{H}]^+$  274.1649, found 274.1645.

### Methyl (4-hydroxy-3,3-dimethyl-2-oxobutanoyl)-L-isoleucinate

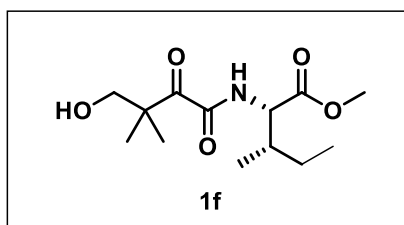

Compound **1f** was prepared and purified in 71% yield (5 g, 18.32 mmol) as colorless oil via column chromatography (5/1 PE/EA), starting from 25.7 mmol of KPL.  $R_f = 0.7$  (PE/EA = 2:1).  $^1\text{H NMR}$  (400 MHz,  $\text{CDCl}_3$ )  $\delta$  7.30 (d,  $J = 9.0$  Hz, 1H), 4.46 (dd,  $J = 8.9, 4.9$  Hz, 1H), 3.69 (s, 3H), 3.68 (s, 2H), 1.89 (ddt,  $J = 9.4, 7.0, 4.8$  Hz, 1H), 1.41-1.34 (m, 1H), 1.22 (s, 6H), 1.18-1.11 (m, 1H), 0.89-0.84 (m, 6H).  $^{13}\text{C NMR}$  (100 MHz,  $\text{CDCl}_3$ )  $\delta$  202.1, 171.4, 160.7, 69.0,

56.4, 52.3, 48.9, 37.8, 25.1, 21.4, 21.3, 15.5, 11.5. HRMS (ESI, m/z) calcd for C<sub>13</sub>H<sub>23</sub>NO<sub>5</sub> [M + H]<sup>+</sup> 274.1649, found 274.1649.

#### Methyl (S)-2-(4-hydroxy-3,3-dimethyl-2-oxobutanamido)-3,3-dimethylbutanoate

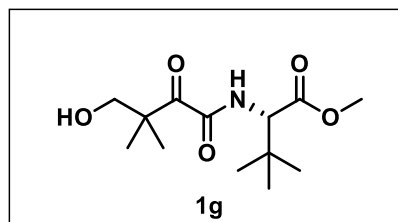

Compound **1g** was prepared and purified in 55% yield (3.0 g, 11.0 mmol) as colorless oil via column chromatography (5/1 PE/EA), starting from 20 mmol of KPL. R<sub>f</sub> = 0.7 (PE/EA = 2:1). <sup>1</sup>H NMR (400 MHz, CDCl<sub>3</sub>) δ 7.34 (d, *J* = 9.8 Hz, 1H), 4.32 (d, *J* = 9.7 Hz, 1H), 3.69 (s, 3H), 3.68 (s, 2H), 1.23 (s, 6H), 0.93 (s, 9H). <sup>13</sup>C NMR (100 MHz, CDCl<sub>3</sub>) δ 202.0, 170.9, 160.4, 69.0, 60.2, 52.1, 48.9, 35.1, 26.5, 21.4. HRMS (ESI, m/z) calcd for C<sub>13</sub>H<sub>23</sub>NO<sub>5</sub> [M + H]<sup>+</sup> 274.1649, found 274.1643.

#### Methyl (4-hydroxy-3,3-dimethyl-2-oxobutanoyl)-L-phenylalaninate

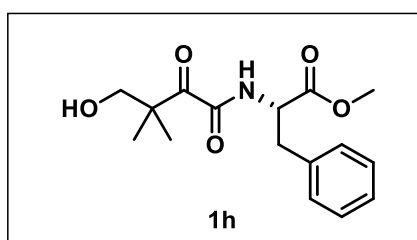

Compound **1h** was prepared and purified in 62% yield (2.5 g, 8.14 mmol) as yellow oil via column chromatography (5/1 PE/EA), starting from 13 mmol of KPL. R<sub>f</sub> = 0.4 (PE/EA = 2:1). <sup>1</sup>H NMR (400 MHz, CDCl<sub>3</sub>) δ 7.36 (d, *J* = 8.3 Hz, 1H), 7.32-7.25 (m, 3H), 7.13 (dd, *J* = 8.0, 1.6 Hz, 2H), 4.84 (dd, *J* = 14.0, 6.9 Hz, 1H), 3.75 (s, 3H), 3.72 (s, 2H), 3.21 (dd, *J* = 13.9, 5.6 Hz, 1H), 3.10 (dd, *J* = 13.9, 6.9 Hz, 1H), 1.25 (s, 3H), 1.24 (s, 3H). <sup>13</sup>C NMR (100 MHz, CDCl<sub>3</sub>) δ 201.8, 171.0, 160.4, 135.4, 129.2, 128.7, 127.4, 69.0, 53.1, 52.6, 48.9, 37.9, 21.34, 21.31. HRMS (ESI, m/z) calcd for C<sub>16</sub>H<sub>21</sub>NO<sub>5</sub> [M + H]<sup>+</sup> 308.1492, found 308.1497.

#### Methyl (4-hydroxy-3,3-dimethyl-2-oxobutanoyl)-L-tyrosinate

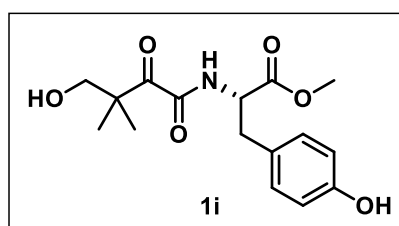

Compound **1i** was prepared and purified in 59% yield (3.8 g, 11.76 mmol) as colorless oil via column chromatography (2/1 PE/EA), starting from 20 mmol of KPL. R<sub>f</sub> = 0.4 (PE/EA = 1:1).

$^1\text{H}$  NMR (400 MHz,  $\text{CDCl}_3$ )  $\delta$  7.27 (d,  $J = 8.4$  Hz, 1H), 6.88 (d,  $J = 8.5$  Hz, 2H), 6.66 (d,  $J = 8.5$  Hz, 2H), 4.70 (dd,  $J = 14.0, 6.8$  Hz, 1H), 3.68 (s, 3H), 3.65 (s, 2H), 3.05 (dd,  $J = 14.1, 5.5$  Hz, 1H), 2.94 (dd,  $J = 14.0, 6.8$  Hz, 1H), 1.17 (s, 3H), 1.16 (s, 3H).  $^{13}\text{C}$  NMR (100 MHz,  $\text{CDCl}_3$ )  $\delta$  201.7, 171.3, 160.6, 155.4, 130.4, 126.7, 115.7, 68.9, 53.3, 52.7, 48.8, 37.0, 21.4, 21.3. HRMS (ESI,  $m/z$ ) calcd for  $\text{C}_{16}\text{H}_{21}\text{NO}_6$   $[\text{M} + \text{H}]^+$  324.1442, found 324.1444.

#### Dimethyl (4-hydroxy-3,3-dimethyl-2-oxobutanoyl)-L-aspartate

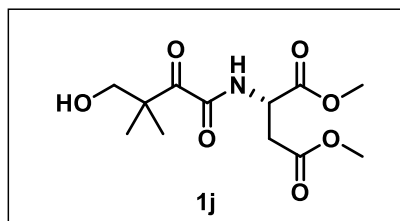

Compound **1j** was prepared and purified in 56% yield (3.2 g, 11.07 mmol) as yellow oil via column chromatography (5/1 PE/EA), starting from 20 mmol of KPL.  $R_f = 0.5$  (PE/EA = 2:1).  $^1\text{H}$  NMR (400 MHz,  $\text{CDCl}_3$ )  $\delta$  7.85 (d,  $J = 8.4$  Hz, 1H), 4.85 (dt,  $J = 9.2, 4.8$  Hz, 1H), 3.80 (s, 3H), 3.79 (s, 5H), 3.72 (s, 3H), 3.08 (dd,  $J = 17.2, 5.0$  Hz, 1H), 2.89 (dd,  $J = 17.2, 4.6$  Hz, 1H), 1.30 (s, 6H).  $^{13}\text{C}$  NMR (100 MHz,  $\text{CDCl}_3$ )  $\delta$  201.8, 171.0, 170.2, 160.7, 69.1, 53.1, 52.3, 48.9, 48.4, 35.8, 21.4, 21.3. HRMS (ESI,  $m/z$ ) calcd for  $\text{C}_{12}\text{H}_{19}\text{NO}_7$   $[\text{M} + \text{H}]^+$  290.1234, found 290.1231.

#### Methyl (4-hydroxy-3,3-dimethyl-2-oxobutanoyl)-D-alaninate

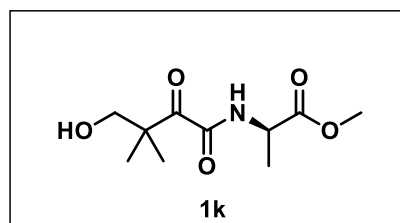

Compound **1k** was prepared and purified in 64% yield (2.5 g, 10.82 mmol) as colorless oil via column chromatography (4/1 PE/EA), starting from 17 mmol of KPL.  $R_f = 0.5$  (PE/EA = 1:1).  $^1\text{H}$  NMR (400 MHz,  $\text{CDCl}_3$ )  $\delta$  7.46 (d,  $J = 7.8$  Hz, 1H), 4.57-4.44 (m, 1H), 3.73 (s, 3H), 3.72 (s, 2H), 1.43 (d,  $J = 7.2$  Hz, 3H), 1.24 (s, 6H).  $^{13}\text{C}$  NMR (100 MHz,  $\text{CDCl}_3$ )  $\delta$  202.1, 172.5, 160.7, 68.9, 52.7, 48.9, 48.0, 21.4, 21.3, 17.7. HRMS (ESI,  $m/z$ ) calcd for  $\text{C}_{10}\text{H}_{17}\text{NO}_5\text{Na}$   $[\text{M} + \text{Na}]^+$  254.0999, found 254.0997.

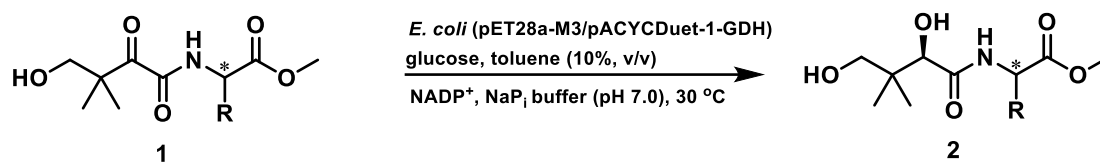

**Scheme S4.** *E. coli* (pET28a-M3/pACYCDuet-1-GDH)-catalyzed stereoselective synthesis of **2**.

A mixture of **1** (10 mM), glucose (20 mM), NADP<sup>+</sup> (0.2 mM), toluene (5 mL, 10%, v/v) and wet cells of *E. coli* (pET28a-M3/pACYCDuet-1-GDH) (2.5 g) in NaPi buffer (45 mL, 100 mM, pH 7.0) was in a round-bottom flask and stirred in a metal heating block at 30 °C and 600 rpm for 12 h. Silica was added and the resulting mixture was stirred for 20 min, and then filtered. DCM (5 x 20 mL) was employed for extraction, and the combined organic layer was dried with Na<sub>2</sub>SO<sub>4</sub>, and concentrated *in vacuo*. The crude product was purified by preparative TLC (1/2 PE/EA) to afford product **2**.

#### Methyl (*R*)-(2,4-dihydroxy-3,3-dimethylbutanoyl)glycinate

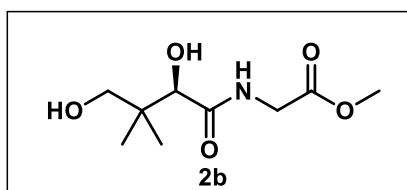

Compound **2b** was prepared in 50% yield (81 mg, 0.37 mmol) as colorless oil, starting from 0.74 mmol of **1b**, and purified by preparative TLC (1/2 PE/EA) with phosphomolybdic acid staining. R<sub>f</sub> = 0.5 (PE/EA = 1:2). <sup>1</sup>H NMR (400 MHz, CDCl<sub>3</sub>) δ 7.42 (s, 1H), 4.51 (d, *J* = 5.1 Hz, 1H), 4.10 (s, 1H), 4.07 (d, *J* = 6.1 Hz, 2H), 3.76 (s, 3H), 3.52 (s, 2H), 2.40 (s, 1H), 1.03 (s, 3H), 0.95 (s, 3H). <sup>13</sup>C NMR (100 MHz, CDCl<sub>3</sub>) δ 174.0, 170.6, 77.4, 71.0, 52.5, 40.7, 39.3, 21.1, 20.5. HRMS (ESI, *m/z*) calcd for C<sub>9</sub>H<sub>17</sub>NO<sub>5</sub> [M + H]<sup>+</sup> 220.1179, found 220.1178. [α]<sub>D</sub><sup>20</sup> = +44.33 (*c* = 0.6, EtOH). HPLC Chiracel AD-H, 250 mm × 4.6 mm column, 60/40/hexane/isopropanol, flow rate of 1.0 mL/min, 254 nm UV lamp, 30 °C, *t*<sub>1</sub> = 5.2 min (major), *t*<sub>2</sub> = 8.1 min; >99% ee (determined upon benzoylation).

#### Methyl (*R*)-(2,4-dihydroxy-3,3-dimethylbutanoyl)-L-alaninate

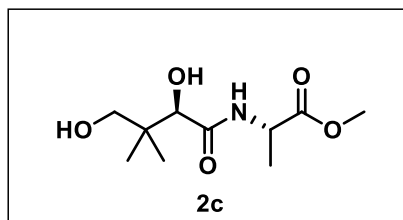

Compound **2c** was prepared in 50% yield (130 mg, 0.56 mmol) as colorless oil, starting from 1.13 mmol of **1c**, and purified by preparative TLC (1/2 PE/EA) with phosphomolybdic acid staining. R<sub>f</sub> = 0.5 (PE/EA = 1:2). <sup>1</sup>H NMR (400 MHz, CDCl<sub>3</sub>) δ 7.25 (d, *J* = 7.8 Hz, 1H), 4.62-4.55 (m, 1H), 4.26 (s, 1H), 4.05 (s, 1H), 3.76 (s, 3H), 3.52 (s, 2H), 1.45 (d, *J* = 7.3 Hz, 3H),

1.05 (s, 3H), 0.97 (s, 3H).  $^{13}\text{C}$  NMR (100 MHz,  $\text{CDCl}_3$ )  $\delta$  173.4, 172.9, 77.8, 71.2, 52.5, 47.6, 39.4, 21.1, 20.7, 17.9. HRMS (ESI, m/z) calcd for  $\text{C}_{10}\text{H}_{19}\text{NO}_5$   $[\text{M} + \text{H}]^+$  234.1336, found 234.1338.  $[\alpha]_{\text{D}}^{20} = +22.55$  ( $c = 1.1$ , EtOH). HPLC Chiracel AD-H, 250 mm  $\times$  4.6 mm column, 60/40/ hexane/isopropanol, flow rate of 1.0 mL/min, 254 nm UV lamp, 30  $^\circ\text{C}$ ,  $t_1 = 5.4$  min (major),  $t_2 = 6.9$  min; >99% de (determined upon benzoylation).

#### Methyl ((*R*)-2,4-dihydroxy-3,3-dimethylbutanoyl)-L-valinate

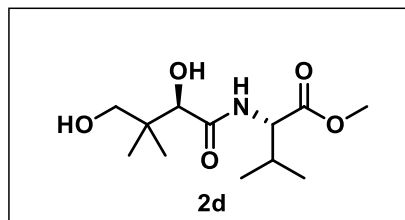

Compound **2d** was prepared in 71% yield (100 mg, 0.38 mmol) as colorless oil, starting from 0.53 mmol of **1d**, and purified by preparative TLC (1/2 PE/EA) with phosphomolybdic acid staining.  $R_f = 0.6$  (PE/EA = 1:2).  $^1\text{H}$  NMR (400 MHz,  $\text{CDCl}_3$ )  $\delta$  7.25 (d,  $J = 8.9$  Hz, 1H), 4.75 (s, 1H), 4.41 (dd,  $J = 8.8, 5.0$  Hz, 1H), 4.01 (s, 1H), 3.67 (s, 3H), 3.42 (s, 2H), 2.19-2.11 (m, 1H), 0.94 (s, 3H), 0.90 (s, 3H), 0.88 (s, 3H), 0.85 (s, 3H).  $^{13}\text{C}$  NMR (100 MHz,  $\text{CDCl}_3$ )  $\delta$  173.6, 172.2, 77.5, 71.0, 56.9, 52.2, 39.4, 30.8, 20.9, 20.6, 19.1, 17.7. HRMS (ESI, m/z) calcd for  $\text{C}_{12}\text{H}_{23}\text{NO}_5$   $[\text{M} + \text{H}]^+$  262.1649, found 260.1647.  $[\alpha]_{\text{D}}^{20} = +16.63$  ( $c = 0.4$ , EtOH). HPLC Chiracel AD-H, 250 mm  $\times$  4.6 mm column, 60/40/ hexane/isopropanol, flow rate of 1.0 mL/min, 254 nm UV lamp, 30  $^\circ\text{C}$ ,  $t_1 = 5.2$  min (major),  $t_2 = 14.9$  min; >99% de (determined upon benzoylation).

#### Methyl ((*R*)-2,4-dihydroxy-3,3-dimethylbutanoyl)-L-leucinate

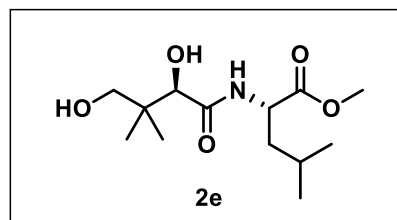

Compound **2e** was prepared in 82% yield (290 mg, 1.05 mmol) as colorless oil, starting from 1.28 mmol of **1e**, and purified by preparative TLC (1/2 PE/EA) with phosphomolybdic acid staining.  $R_f = 0.7$  (PE/EA = 1:2).  $^1\text{H}$  NMR (400 MHz,  $\text{CDCl}_3$ )  $\delta$  7.20 (d,  $J = 8.3$  Hz, 1H), 4.62-4.55 (m, 1H), 4.05 (s, 1H), 3.74 (s, 3H), 3.50 (s, 2H), 1.71-1.58 (m, 3H), 1.03 (s, 3H), 0.96 (s, 3H), 0.94 (d,  $J = 5.5$  Hz, 6H).  $^{13}\text{C}$  NMR (100 MHz,  $\text{CDCl}_3$ )  $\delta$  173.4, 77.7, 71.1, 52.4, 50.4, 41.0, 39.4, 24.9, 22.8, 21.7, 21.0, 20.7. HRMS (ESI, m/z) calcd for  $\text{C}_{13}\text{H}_{25}\text{NO}_5$   $[\text{M} + \text{H}]^+$  276.1805, found 276.1808.  $[\alpha]_{\text{D}}^{20} = +12.13$  ( $c = 2.4$ , EtOH). HPLC Chiracel AD-H, 250 mm  $\times$  4.6 mm column, 60/40/ hexane/isopropanol, flow rate of 1.0 mL/min, 254 nm UV lamp, 30  $^\circ\text{C}$ ,  $t_1 = 4.9$  min (major),  $t_2 = 7.1$  min; >99% de (determined upon benzoylation).

#### Methyl ((*R*)-2,4-dihydroxy-3,3-dimethylbutanoyl)-L-isoleucinate

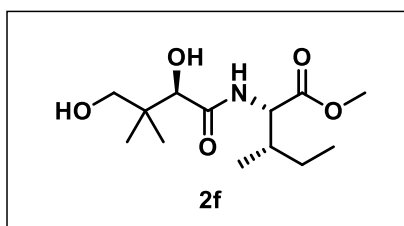

Compound **2f** was prepared in 71% yield (100 mg, 0.36 mmol) as colorless oil, starting from 0.51 mmol of **1f**, and purified by preparative TLC (1/2 PE/EA) with phosphomolybdic acid staining.  $R_f = 0.7$  (PE/EA = 1:2).  $^1\text{H NMR}$  (400 MHz,  $\text{CDCl}_3$ )  $\delta$  7.26 (d,  $J = 8.6$  Hz, 1H), 4.45 (dd,  $J = 8.6, 4.9$  Hz, 1H), 4.00 (s, 1H), 3.67 (s, 3H), 3.42 (s, 2H), 1.88 (ddt,  $J = 9.4, 7.0, 4.7$  Hz, 1H), 1.42-1.33 (m, 1H), 1.20-1.10 (m, 1H), 0.94 (s, 3H), 0.89-0.81 (m, 9H).  $^{13}\text{C NMR}$  (100 MHz,  $\text{CDCl}_3$ )  $\delta$  173.6, 172.2, 77.4, 71.0, 56.2, 52.2, 39.3, 37.4, 25.1, 20.8, 20.6, 15.6, 11.5. HRMS (ESI,  $m/z$ ) calcd for  $\text{C}_{13}\text{H}_{25}\text{NO}_5$   $[\text{M} + \text{H}]^+$  276.1805, found 276.1805.  $[\alpha]_D^{20} = +31.88$  ( $c = 0.6$ , EtOH). HPLC Chiracel AD-H, 250 mm  $\times$  4.6 mm column, 60/40/ hexane/isopropanol, flow rate of 1.0 mL/min, 254 nm UV lamp, 30  $^\circ\text{C}$ ,  $t_1 = 5.0$  min (major),  $t_2 = 8.9$  min; >99% de (determined upon benzoylation).

**Methyl (S)-2-((R)-2,4-dihydroxy-3,3-dimethylbutanoyl)-3,3-dimethylbutanoate**

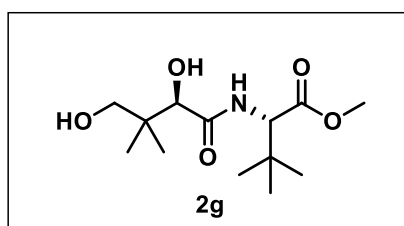

Compound **2g** was prepared in 62% yield (90 mg, 0.33 mmol) as colorless oil, starting from 0.53 mmol of **1g**, and purified by preparative TLC (1/2 PE/EA) with phosphomolybdic acid staining.  $R_f = 0.7$  (PE/EA = 1:2).  $^1\text{H NMR}$  (400 MHz,  $\text{CDCl}_3$ )  $\delta$  7.34 (d,  $J = 8.9$  Hz, 1H), 4.28 (d,  $J = 9.0$  Hz, 1H), 4.00 (s, 1H), 3.66 (s, 3H), 3.41 (s, 2H), 0.93 (s, 12H), 0.85 (s, 3H).  $^{13}\text{C NMR}$  (100 MHz,  $\text{CDCl}_3$ )  $\delta$  173.4, 171.7, 77.4, 71.1, 60.0, 51.8, 39.4, 34.3, 26.6, 20.8, 20.4. HRMS (ESI,  $m/z$ ) calcd for  $\text{C}_{13}\text{H}_{25}\text{NO}_5$   $[\text{M} + \text{H}]^+$  276.1805, found 276.1799.  $[\alpha]_D^{20} = +58.75$  ( $c = 0.4$ , EtOH). HPLC Chiracel AD-H, 250 mm  $\times$  4.6 mm column, 60/40/ hexane/isopropanol, flow rate of 1.0 mL/min, 254 nm UV lamp, 30  $^\circ\text{C}$ ,  $t_1 = 5.4$  min (major),  $t_2 = 14.9$  min; >99% de (determined upon benzoylation).

**Methyl ((R)-2,4-dihydroxy-3,3-dimethylbutanoyl)-L-phenylalaninate**

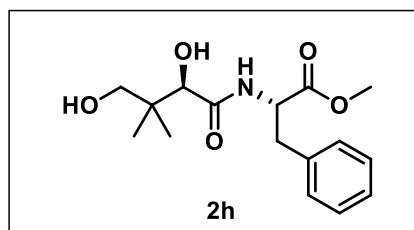

Compound **2h** was prepared in 75% yield (240 mg, 0.78 mmol) as yellow oil, starting from 1.03 mmol of **1h**, and purified by preparative TLC (1/2 PE/EA) with phosphomolybdic acid



staining. Rf = 0.5 (PE/EA = 1:2). <sup>1</sup>H NMR (400 MHz, CDCl<sub>3</sub>) δ 7.24-7.17 (m, 3H), 7.14 (d, *J* = 7.1 Hz, 1H), 7.07 (d, *J* = 7.1 Hz, 2H), 4.75 (q, *J* = 7.5 Hz, 1H), 3.90 (s, 1H), 3.62 (s, 3H), 3.32 (q, *J* = 11.1 Hz, 2H), 3.12-2.95 (m, 2H), 0.86 (s, 3H), 0.79 (s, 3H). <sup>13</sup>C NMR (100 MHz, CDCl<sub>3</sub>) δ 173.4, 172.0, 135.8, 129.1, 128.7, 127.2, 77.3, 70.9, 52.9, 52.4, 39.2, 37.7, 20.8, 20.6. HRMS (ESI, *m/z*) calcd for C<sub>16</sub>H<sub>23</sub>NO<sub>5</sub> [M + H]<sup>+</sup> 310.1649, found 310.1650. [α]<sub>D</sub><sup>20</sup> = +44.25 (c = 0.8, EtOH). HPLC Chiracel AD-H, 250 mm × 4.6 mm column, 60/40/ hexane/isopropanol, flow rate of 1.0 mL/min, 254 nm UV lamp, 30 °C, t<sub>1</sub> = 6.6 min (major), t<sub>2</sub> = 10.9 min; >99% de (determined upon benzoylation).

#### Methyl ((*R*)-2,4-dihydroxy-3,3-dimethylbutanoyl)-L-tyrosinate

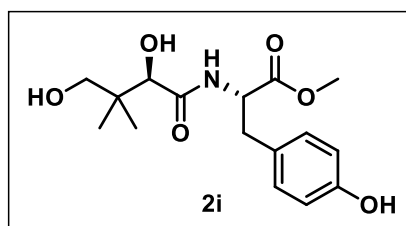

Compound **2i** was prepared in 75% yield (240 mg, 0.74 mmol) as colorless oil, starting from 0.98 mmol of **1i**, and purified by preparative TLC (1/2 PE/EA) with phosphomolybdic acid staining. Rf = 0.4 (PE/EA = 1:2). <sup>1</sup>H NMR (400 MHz, CDCl<sub>3</sub>) δ 7.20 (d, *J* = 8.3 Hz, 1H), 6.98 (d, *J* = 8.1 Hz, 2H), 6.71 (d, *J* = 8.2 Hz, 2H), 4.86 – 4.78 (m, 1H), 4.27 (d, *J* = 4.0 Hz, 1H), 3.94 (d, *J* = 4.7 Hz, 1H), 3.75 (s, 3H), 3.43 (s, 2H), 3.14 (dd, *J* = 14.1, 5.1 Hz, 1H), 2.95 (dd, *J* = 14.2, 7.8 Hz, 1H), 0.95 (s, 3H), 0.89 (s, 3H). <sup>13</sup>C NMR (100 MHz, CDCl<sub>3</sub>) δ 173.4, 172.2, 155.3, 130.3, 127.3, 115.7, 77.5, 70.9, 52.9, 52.6, 39.3, 36.9, 21.0, 20.6. HRMS (ESI, *m/z*) calcd for C<sub>16</sub>H<sub>23</sub>NO<sub>6</sub> [M + H]<sup>+</sup> 326.1598, found 326.1594. [α]<sub>D</sub><sup>20</sup> = +53.50 (c = 0.6, EtOH). HPLC Chiracel AD-H, 250 mm × 4.6 mm column, 60/40/ hexane/isopropanol, flow rate of 1.0 mL/min, 254 nm UV lamp, 30 °C, t<sub>1</sub> = 10.2 min (major), t<sub>2</sub> = 15.4 min; >99% de (determined upon benzoylation).

#### Dimethyl ((*R*)-2,4-dihydroxy-3,3-dimethylbutanoyl)-L-aspartate

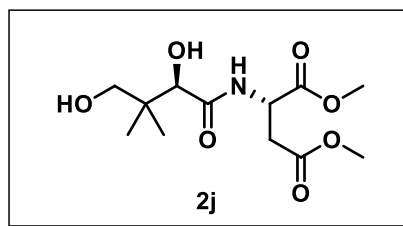

Compound **2j** was prepared in 51% yield (80 mg, 0.27 mmol) as yellow oil, starting from 0.53 mmol of **1j**, and purified by preparative TLC (1/2 PE/EA) with phosphomolybdic acid staining. Rf = 0.5 (PE/EA = 1:2). <sup>1</sup>H NMR (400 MHz, CDCl<sub>3</sub>) δ 7.69 (d, *J* = 8.6 Hz, 1H), 4.90 (dt, *J* = 9.2, 4.8 Hz, 1H), 4.29 (s, 1H), 4.07 (s, 1H), 3.77 (s, 3H), 3.71 (s, 3H), 3.52 (s, 2H), 3.06 (dd, *J* = 17.1, 5.1 Hz, 1H), 2.87 (dd, *J* = 17.1, 4.6 Hz, 1H), 1.04 (s, 3H), 0.97 (s, 3H). <sup>13</sup>C NMR (100 MHz, CDCl<sub>3</sub>) δ 173.1, 171.6, 171.1, 77.8, 71.1, 52.9, 52.2, 48.1, 39.3, 35.9, 21.0, 20.7. HRMS (ESI, *m/z*) calcd for C<sub>12</sub>H<sub>21</sub>NO<sub>7</sub> [M + H]<sup>+</sup> 292.1391, found 292.1390. [α]<sub>D</sub><sup>20</sup> = +40.67 (c = 0.6, EtOH). HPLC Chiracel AD-H, 250 mm × 4.6 mm column, 60/40/ hexane/isopropanol, flow

rate of 1.0 mL/min, 254 nm UV lamp, 30 °C,  $t_1 = 8.1$  min (major),  $t_2 = 13.0$  min; >99% de (determined upon benzoylation).

### Methyl ((*R*)-2,4-dihydroxy-3,3-dimethylbutanoyl)-*D*-alaninate

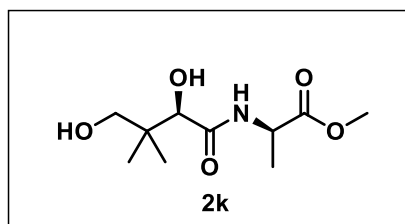

Compound **2k** was prepared in 61% yield (210 mg, 0.90 mmol) as colorless oil, starting from 1.48 mmol of **1k**, and purified by preparative TLC (1/2 PE/EA) with phosphomolybdic acid staining.  $R_f = 0.5$  (PE/EA = 1:2).  $^1\text{H NMR}$  (400 MHz,  $\text{CDCl}_3$ )  $\delta$  7.38 (d,  $J = 4.2$  Hz, 1H), 4.54-4.47 (m, 1H), 3.98 (s, 1H), 3.69 (s, 3H), 3.42 (s, 2H), 1.36 (d,  $J = 7.3$  Hz, 3H), 0.92 (s, 3H), 0.85 (s, 3H).  $^{13}\text{C NMR}$  (100 MHz,  $\text{CDCl}_3$ )  $\delta$  173.6, 173.4, 76.7, 70.8, 52.6, 47.7, 39.3, 21.0, 20.2, 18.1. HRMS (ESI,  $m/z$ ) calcd for  $\text{C}_{10}\text{H}_{19}\text{NO}_5\text{Na}$  [ $\text{M} + \text{Na}$ ] $^+$  256.1155, found 256.1164.  $[\alpha]_D^{20} = +63.00$  ( $c = 1.6$ , EtOH). HPLC Chiracel AD-H, 250 mm  $\times$  4.6 mm column, 60/40/hexane/isopropanol, flow rate of 1.0 mL/min, 254 nm UV lamp, 30 °C,  $t_1 = 4.5$  min (major),  $t_2 = 6.0$  min; >99% de (determined upon benzoylation).

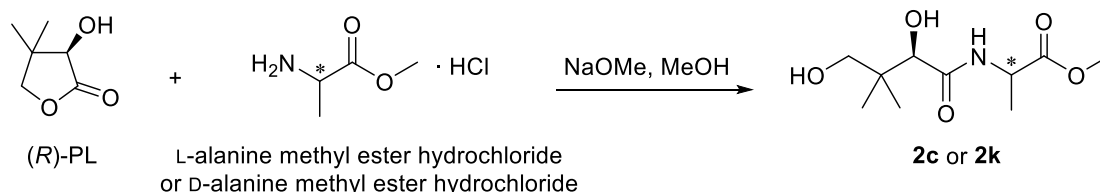

### Scheme S5. Synthesis of compounds **2c** or **2k** using (*R*)-PL.

A mixture of NaOMe (1.1 equiv.), L-alanine methyl ester hydrochloride or D-alanine methyl ester hydrochloride (1.05 equiv.), and (*R*)-PL (1.0 equiv.) in anhydrous MeOH was stirred overnight at room temperature. Methanol was removed, and the mixture was dissolved in water, extracted with EtOAc. The organic layer was washed with brine, dried with  $\text{Na}_2\text{SO}_4$ , and concentrated *in vacuo* to give the crude product. A portion of the crude product was purified by preparative TLC to afford **2c** or **2k** for characterization and derivatization purposes.

### Methyl ((*R*)-2,4-dihydroxy-3,3-dimethylbutanoyl)-*L*-alaninate

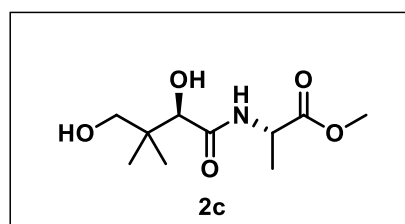

$^1\text{H}$  NMR (400 MHz,  $\text{CDCl}_3$ )  $\delta$  7.33 (d,  $J = 7.6$  Hz, 1H), 4.58-4.51 (m, 1H), 4.03 (d,  $J = 4.8$  Hz, 1H), 3.97 (s, 1H), 3.74 (s, 3H), 3.53-3.44 (m, 2H), 1.43 (d,  $J = 7.3$  Hz, 3H), 1.01 (s, 3H), 0.94 (s, 3H).  $[\alpha]_{\text{D}}^{20} = +22.91$  ( $c = 2.3$ , EtOH).

**Methyl ((*R*)-2,4-dihydroxy-3,3-dimethylbutanoyl)-D-alaninate**

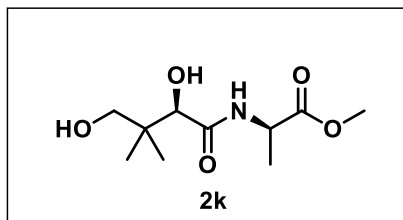

$^1\text{H}$  NMR (400 MHz,  $\text{CDCl}_3$ )  $\delta$  7.41 (d,  $J = 7.7$  Hz, 1H), 4.53-4.46 (m, 1H), 3.98 (s, 1H), 3.68 (s, 3H), 3.41 (s, 2H), 1.36 (d,  $J = 7.3$  Hz, 3H), 0.90 (s, 3H), 0.85 (s, 3H).  $[\alpha]_{\text{D}}^{20} = +58.37$  ( $c = 1.6$ , EtOH).

**References**

[1] A. Gruessner, H. Hata, T. Morishita, S. Akutsu and M. Kawamura, *Synthesis*, 1991, **4**, 289-291.

# <sup>1</sup>H-NMR and <sup>13</sup>C-NMR Spectra

The <sup>1</sup>H NMR (400 MHz, CDCl<sub>3</sub>) spectrum of **1a**

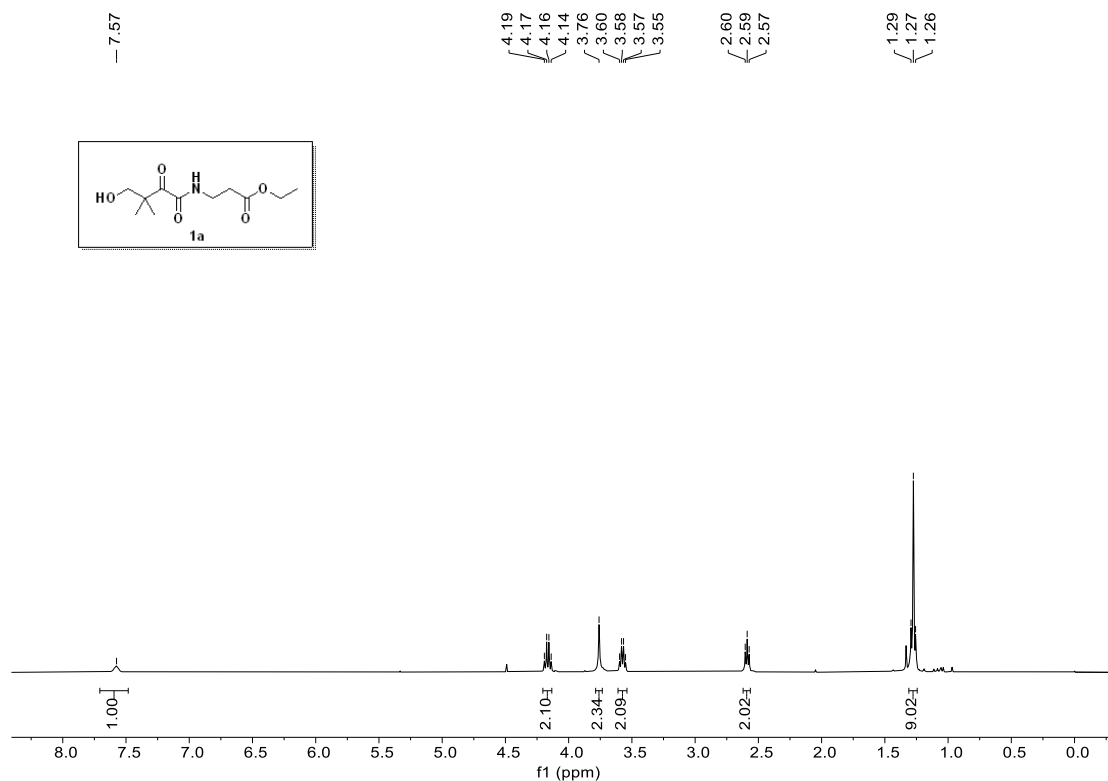

The <sup>13</sup>C NMR (100 MHz, CDCl<sub>3</sub>) spectrum of **1a**

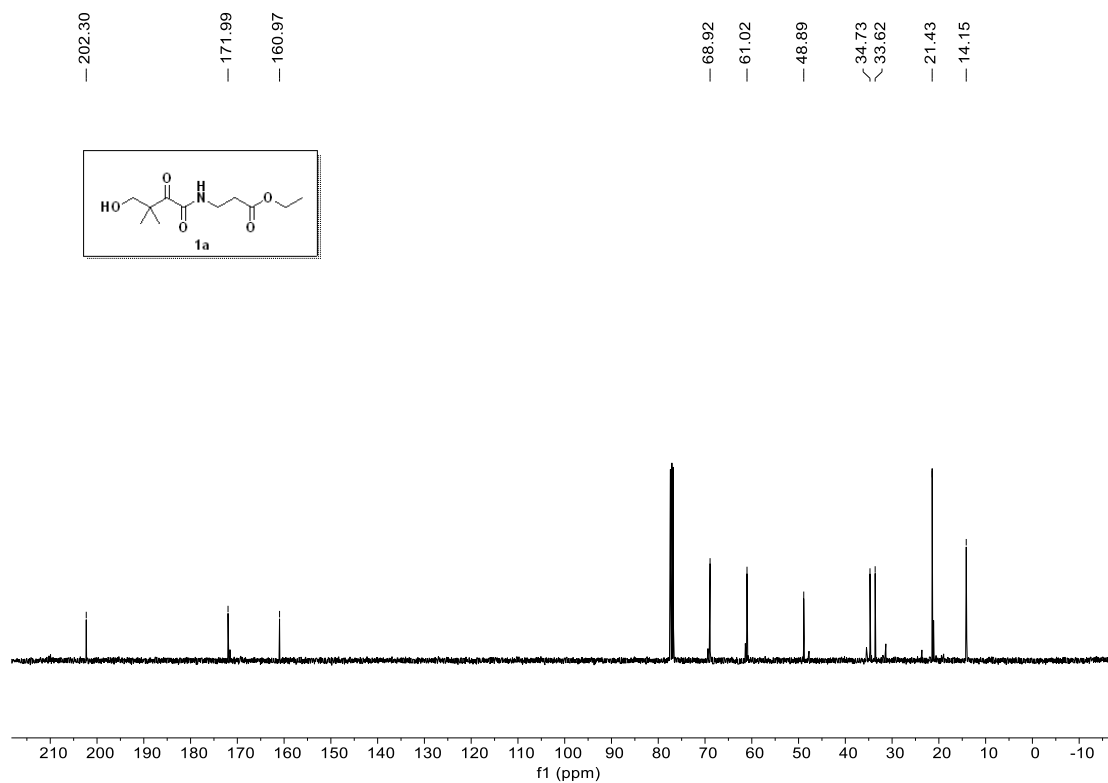

The  $^1\text{H}$  NMR (400 MHz,  $\text{CDCl}_3$ ) spectrum of **1b**

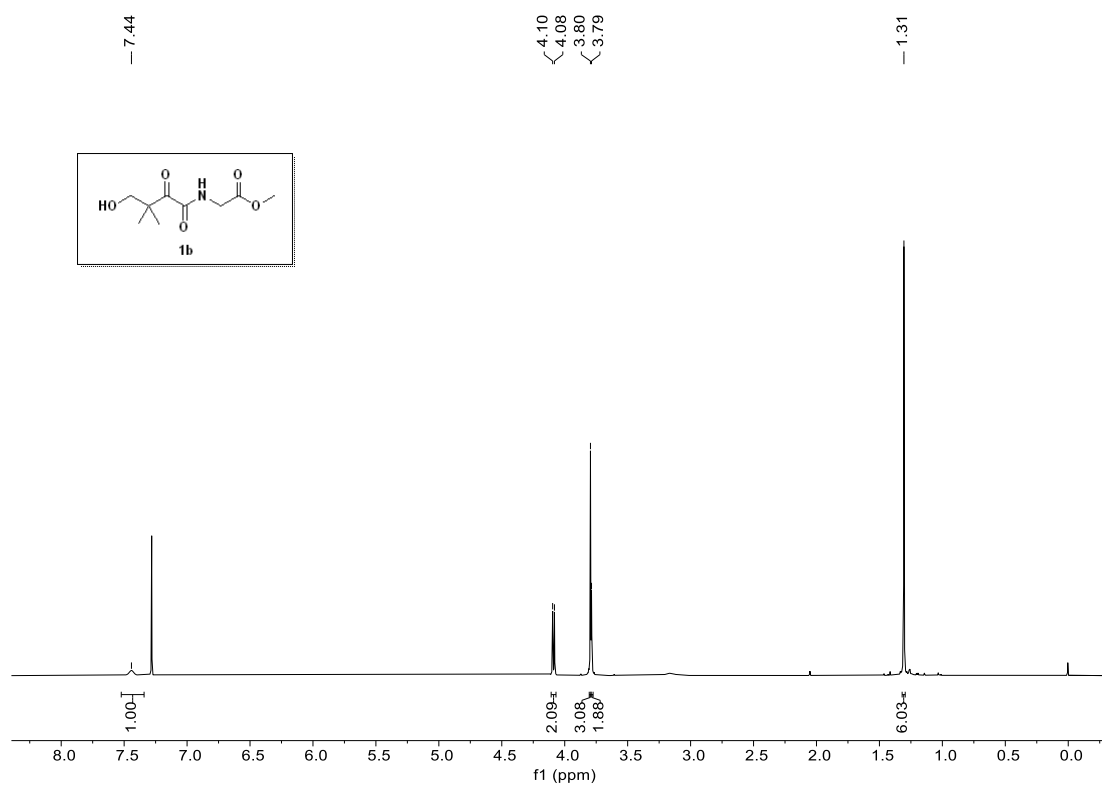

The  $^{13}\text{C}$  NMR (100 MHz,  $\text{CDCl}_3$ ) spectrum of **1b**

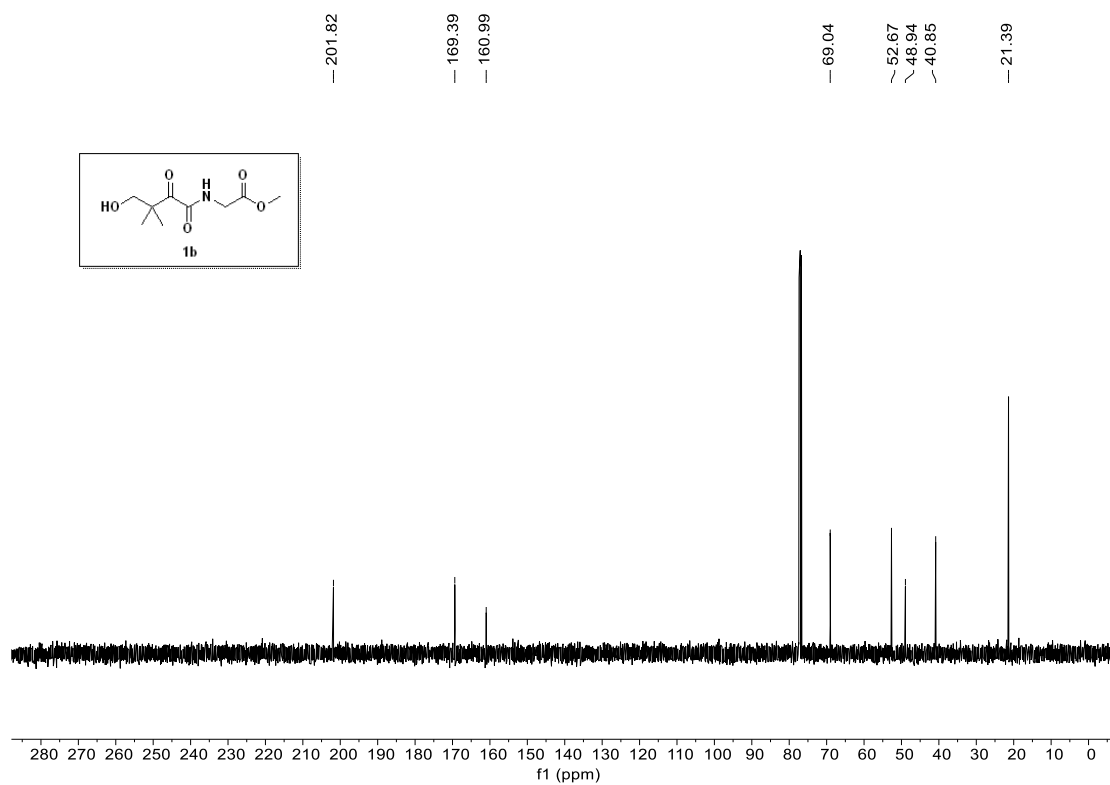

The  $^1\text{H}$  NMR (400 MHz,  $\text{CDCl}_3$ ) spectrum of **1c**

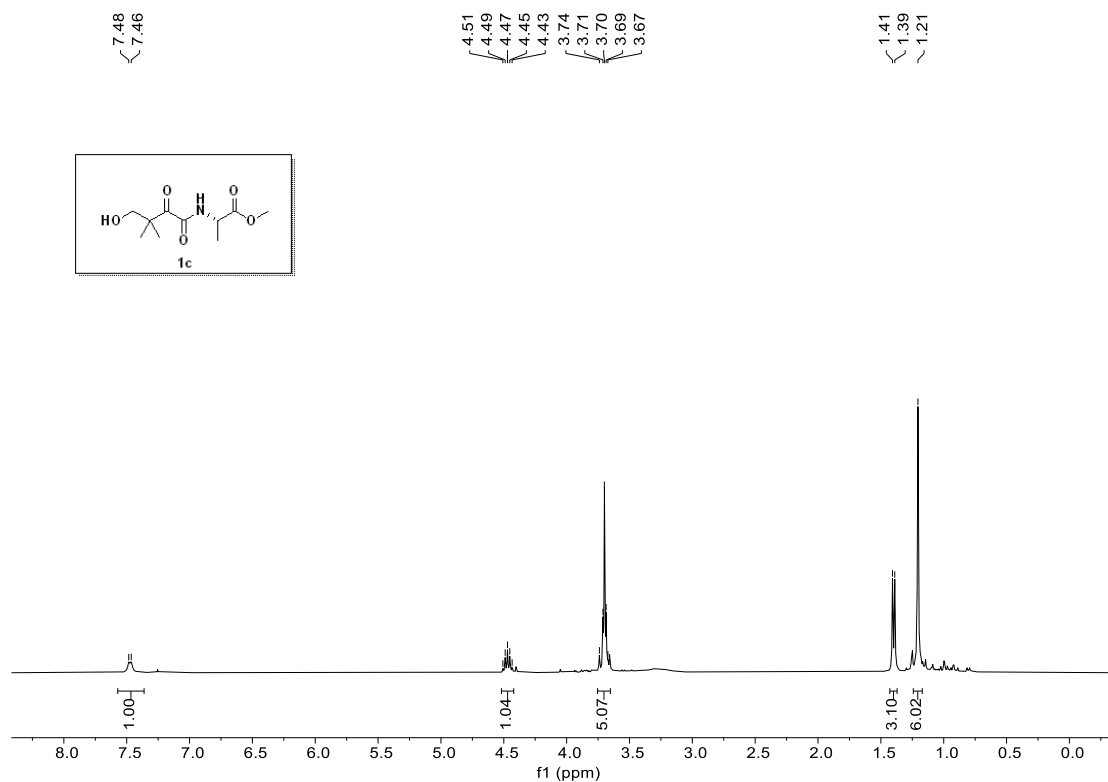

The  $^{13}\text{C}$  NMR (100 MHz,  $\text{CDCl}_3$ ) spectrum of **1c**

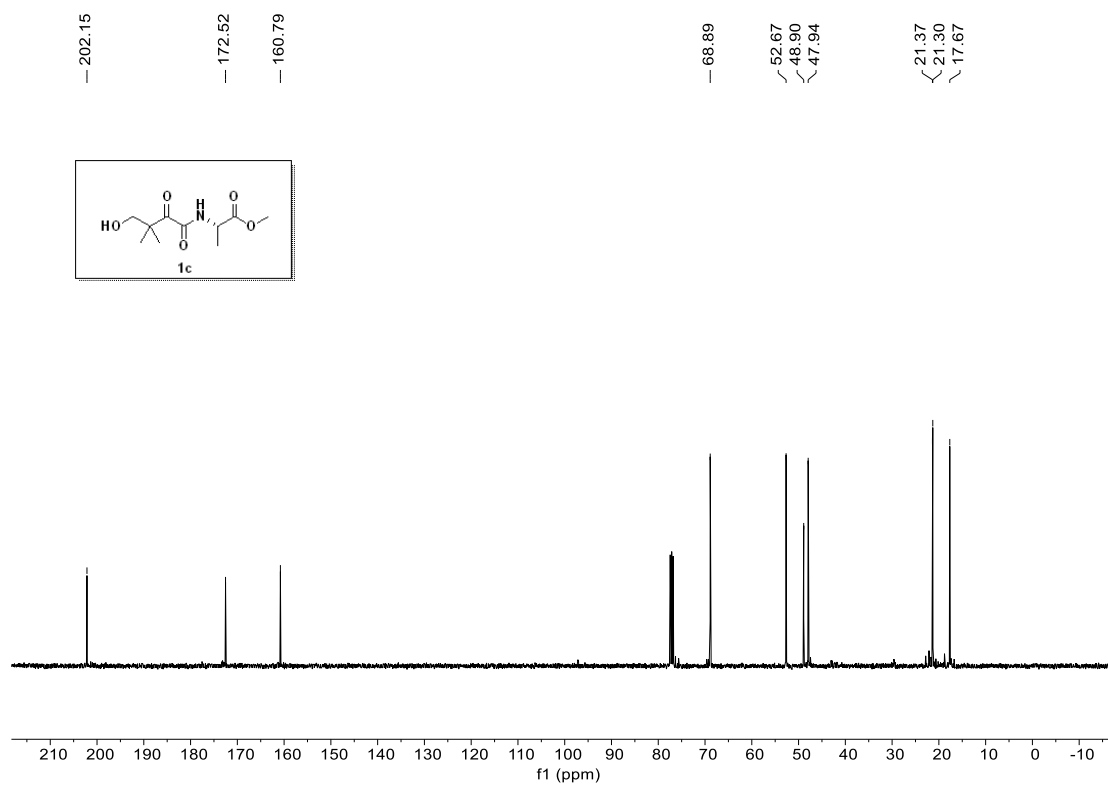

The  $^1\text{H}$  NMR (400 MHz,  $\text{CDCl}_3$ ) spectrum of **1d**

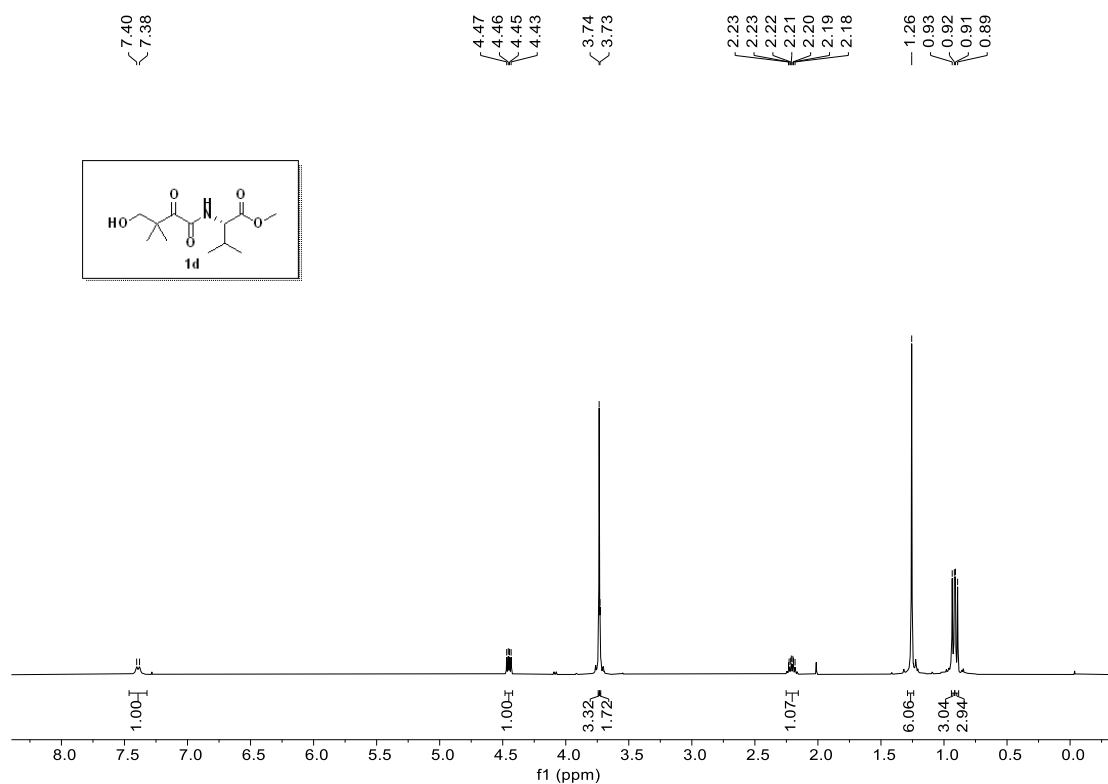

The  $^{13}\text{C}$  NMR (100 MHz,  $\text{CDCl}_3$ ) spectrum of **1d**

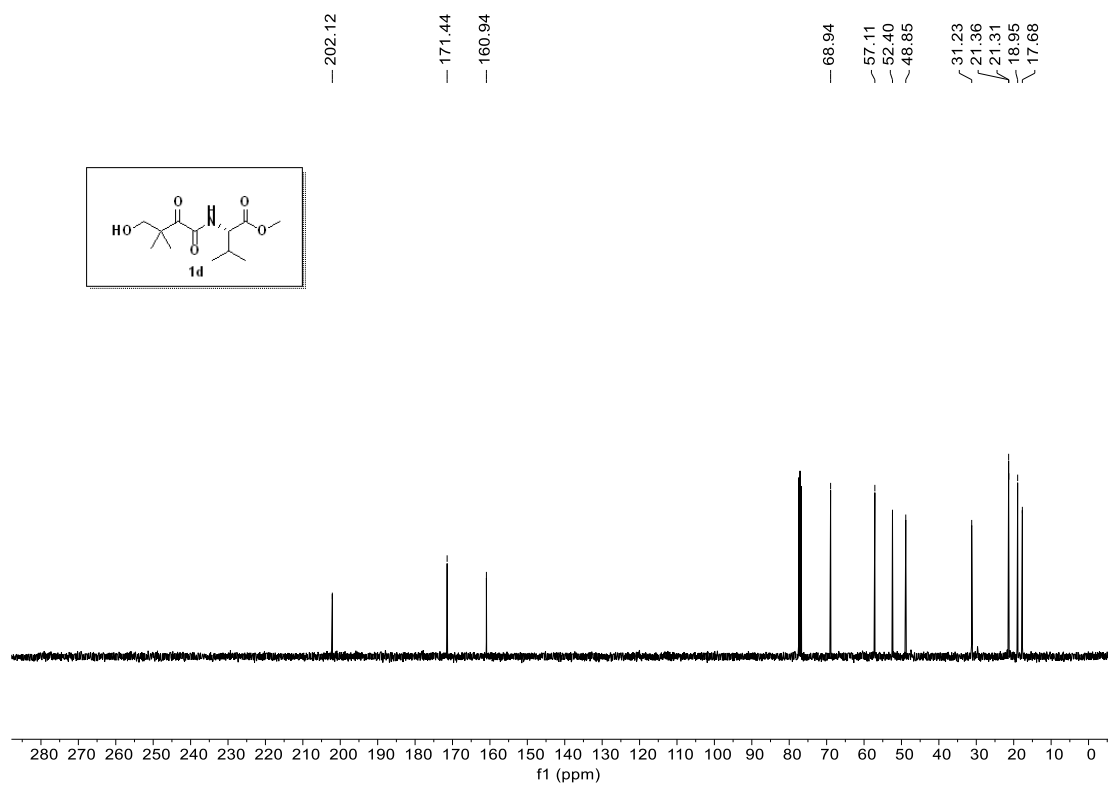

The  $^1\text{H}$  NMR (400 MHz,  $\text{CDCl}_3$ ) spectrum of **1e**

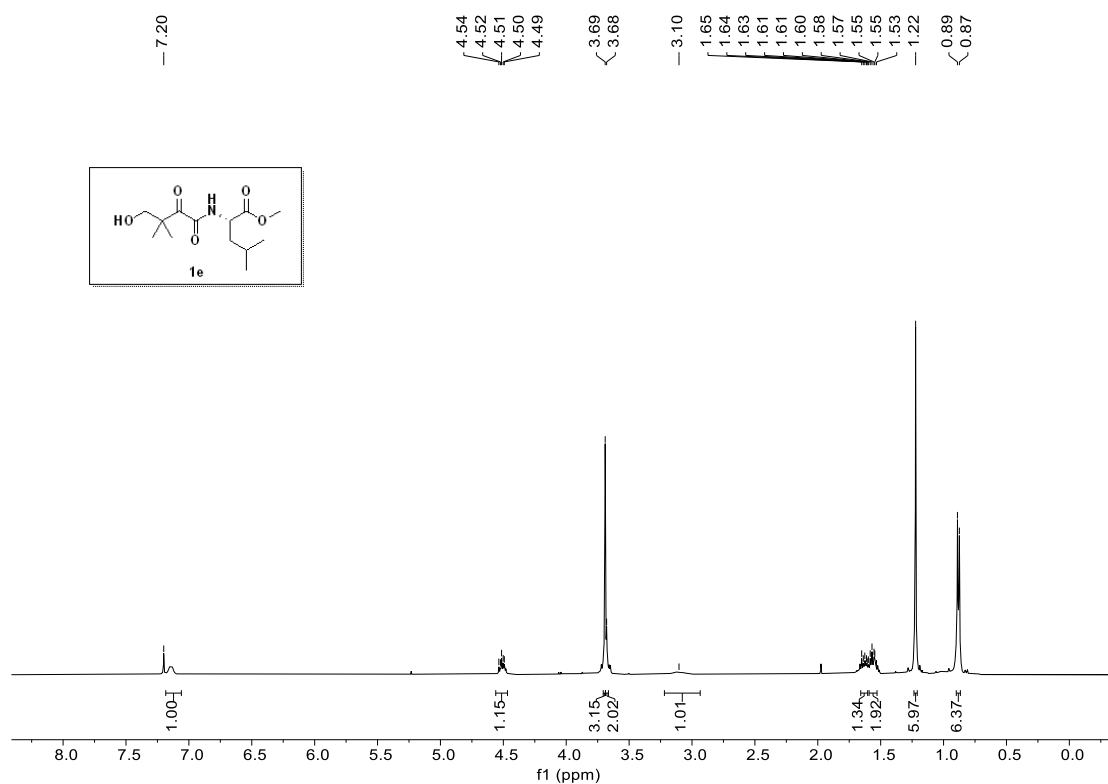

The  $^{13}\text{C}$  NMR (100 MHz,  $\text{CDCl}_3$ ) spectrum of **1e**

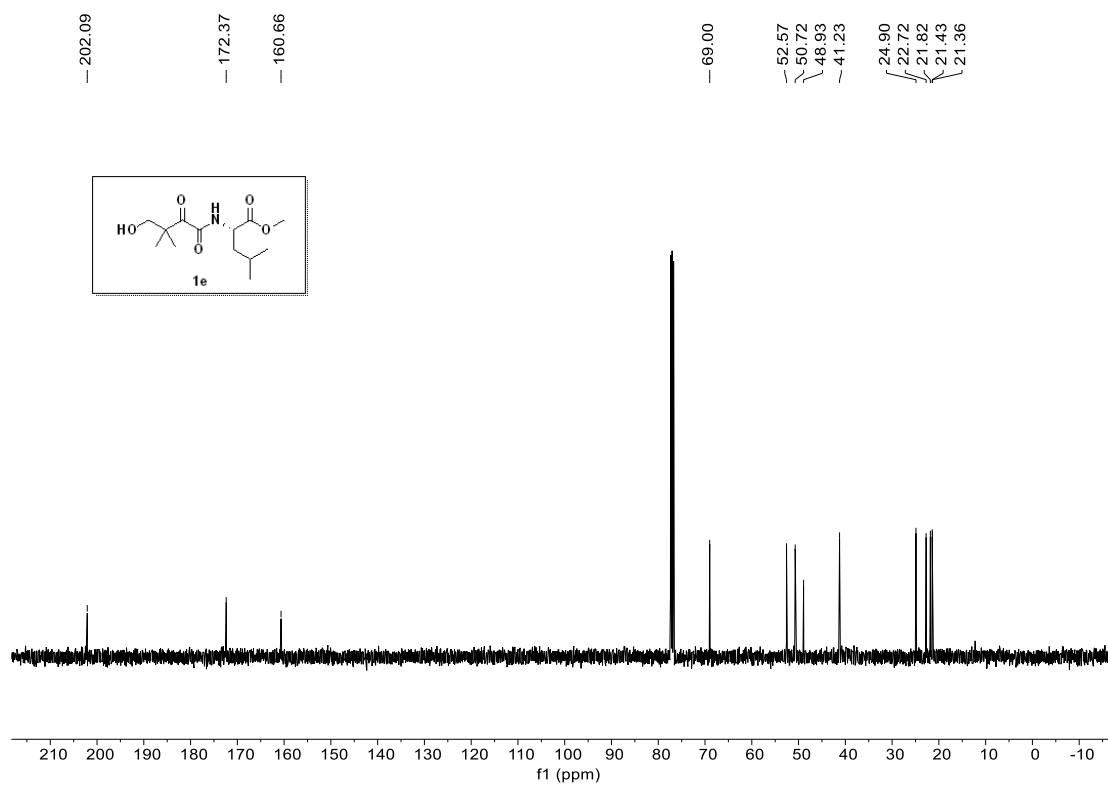



The  $^1\text{H}$  NMR (400 MHz,  $\text{CDCl}_3$ ) spectrum of **1f**

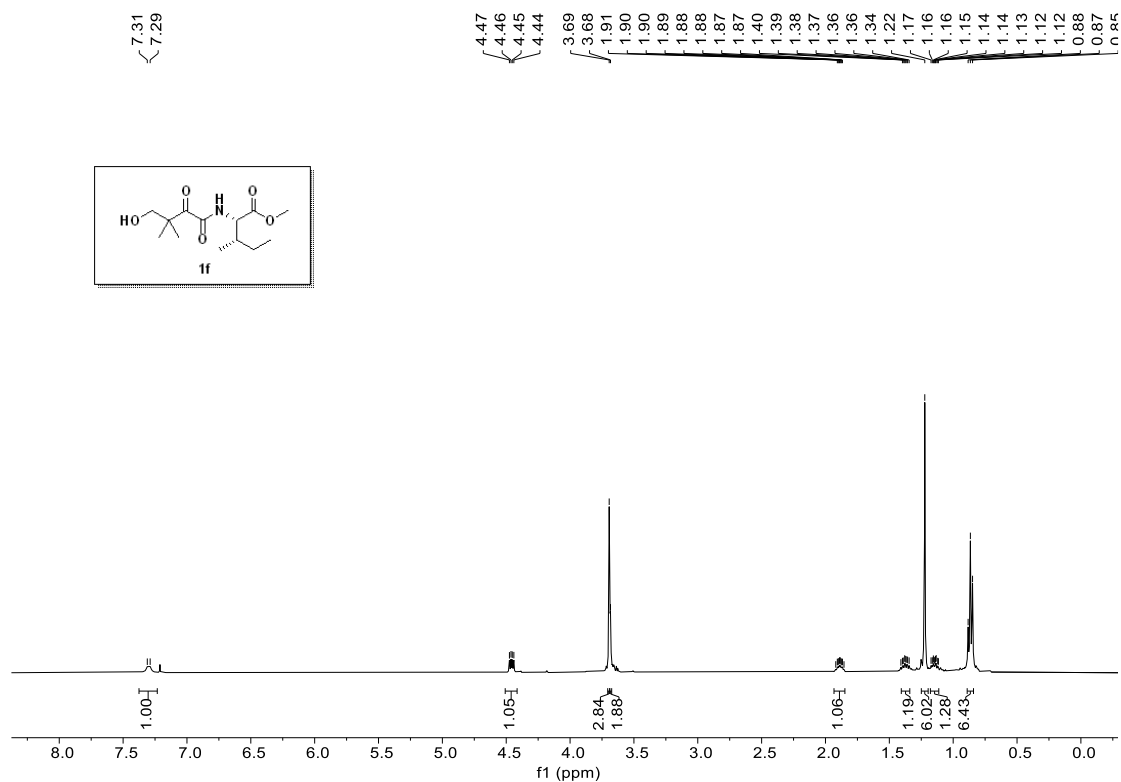

The  $^{13}\text{C}$  NMR (100 MHz,  $\text{CDCl}_3$ ) spectrum of **1f**

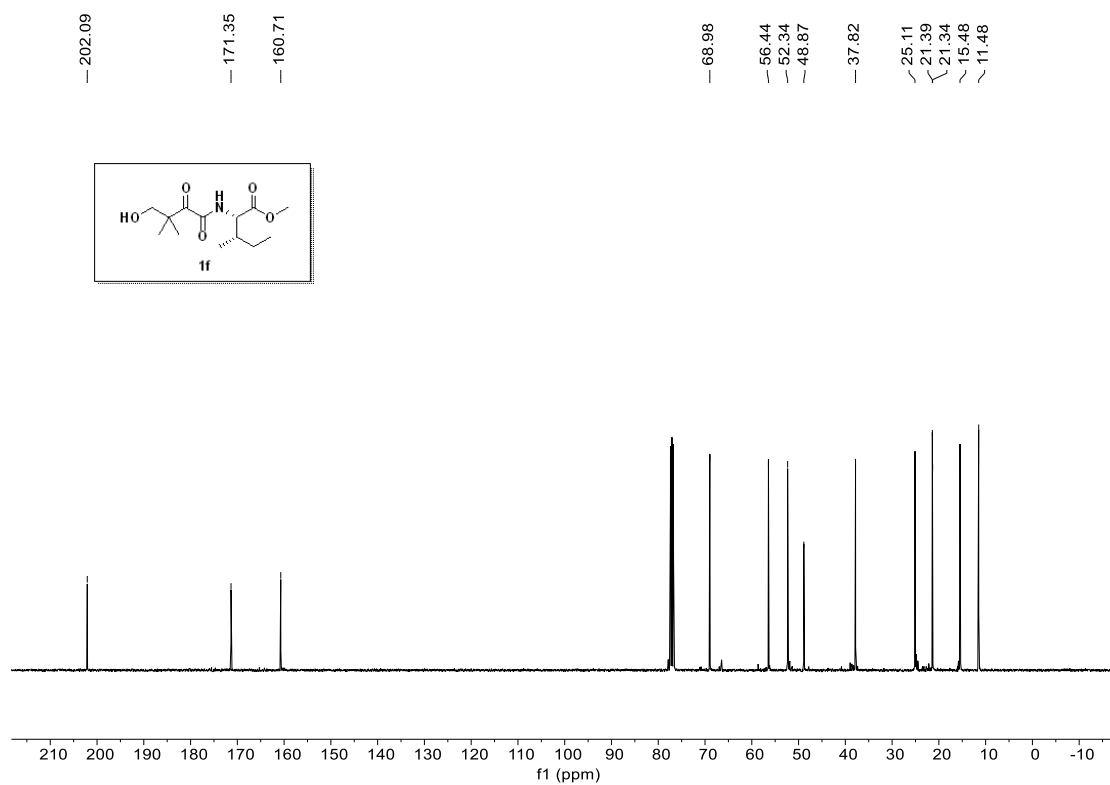

The  $^1\text{H}$  NMR (400 MHz,  $\text{CDCl}_3$ ) spectrum of **1g**

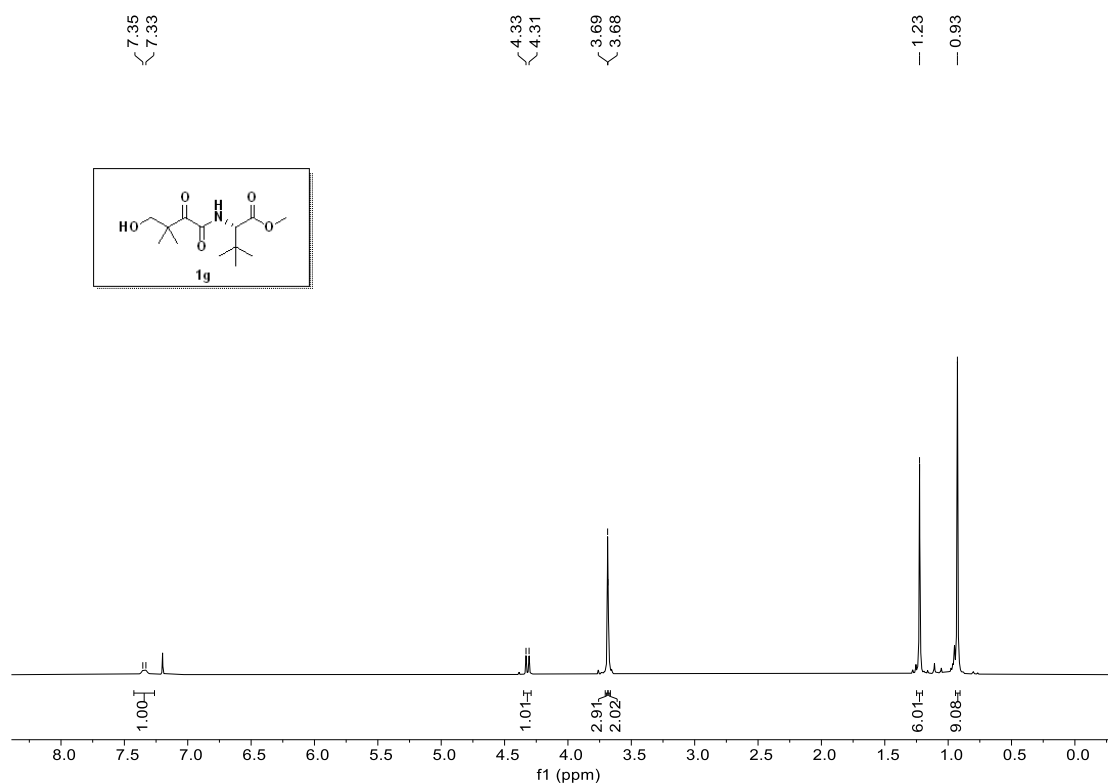

The  $^{13}\text{C}$  NMR (100 MHz,  $\text{CDCl}_3$ ) spectrum of **1g**

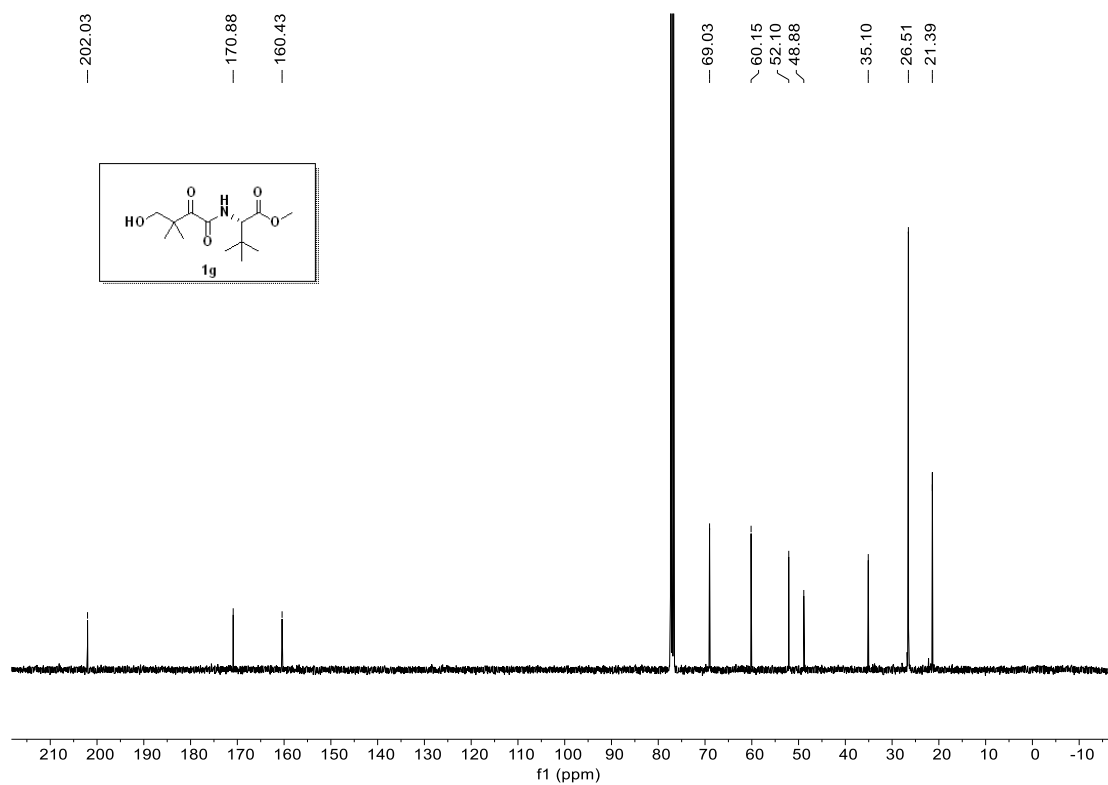

The  $^1\text{H}$  NMR (400 MHz,  $\text{CDCl}_3$ ) spectrum of **1h**

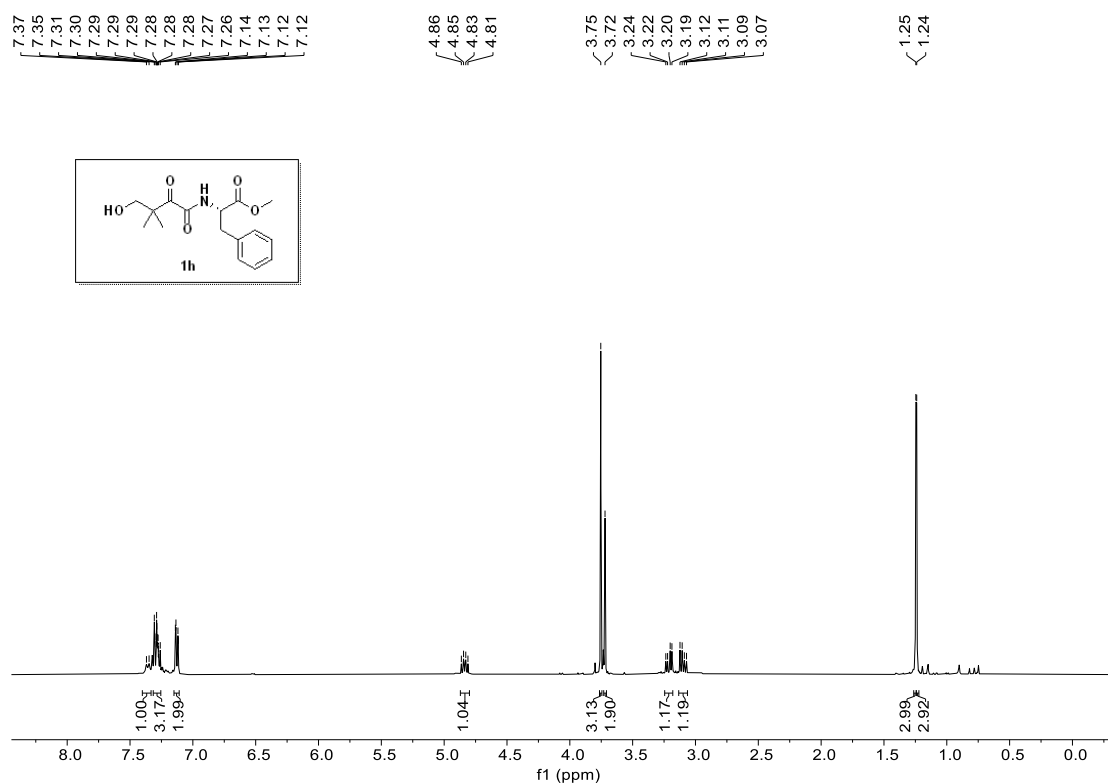

The  $^{13}\text{C}$  NMR (100 MHz,  $\text{CDCl}_3$ ) spectrum of **1h**

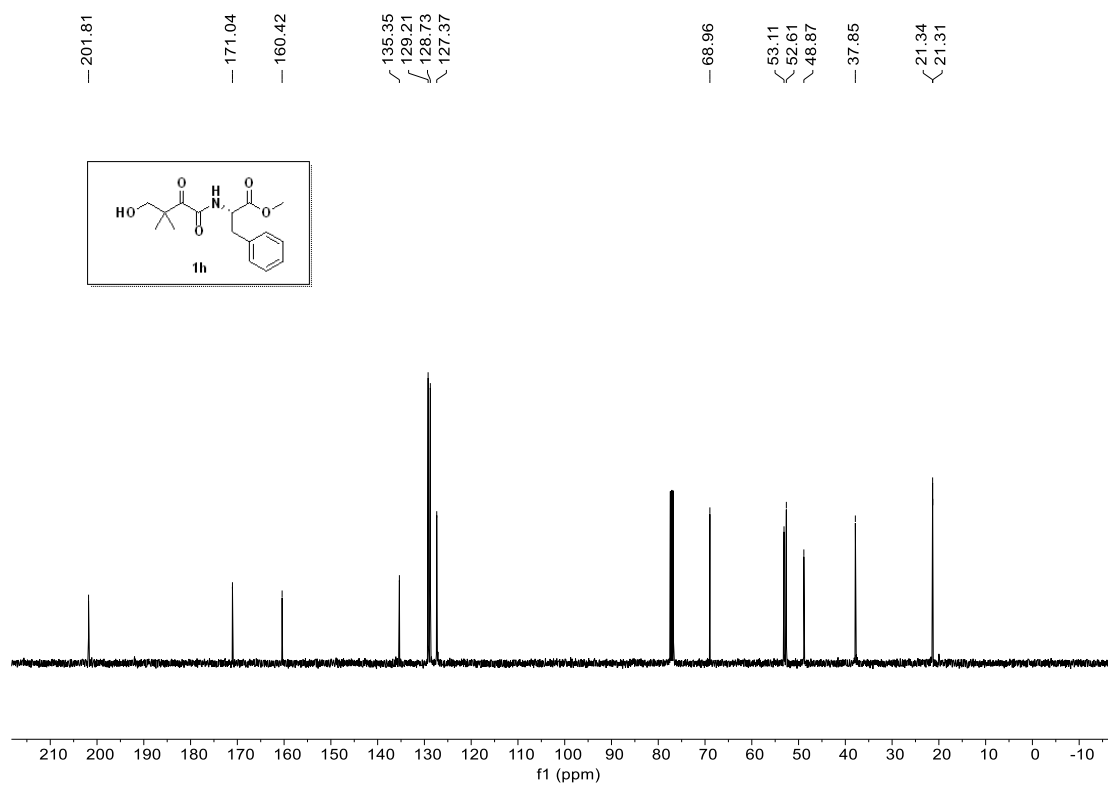

The  $^1\text{H}$  NMR (400 MHz,  $\text{CDCl}_3$ ) spectrum of **1i**

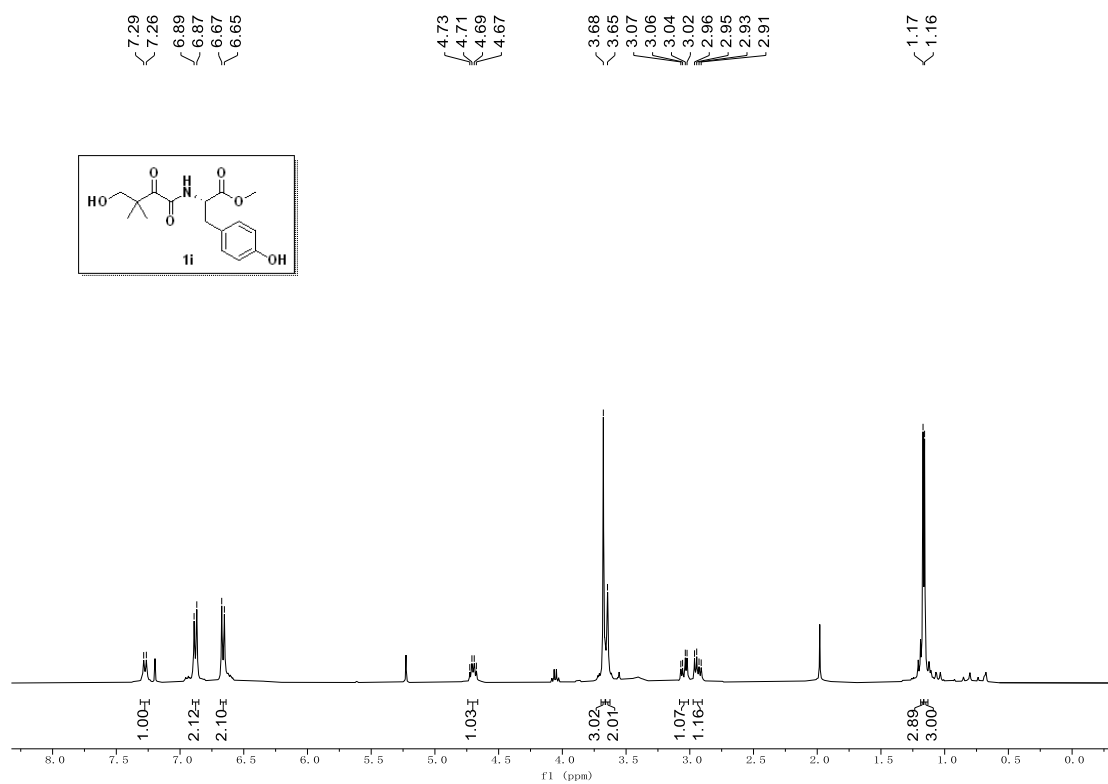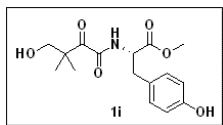

The  $^{13}\text{C}$  NMR (100 MHz,  $\text{CDCl}_3$ ) spectrum of **1i**

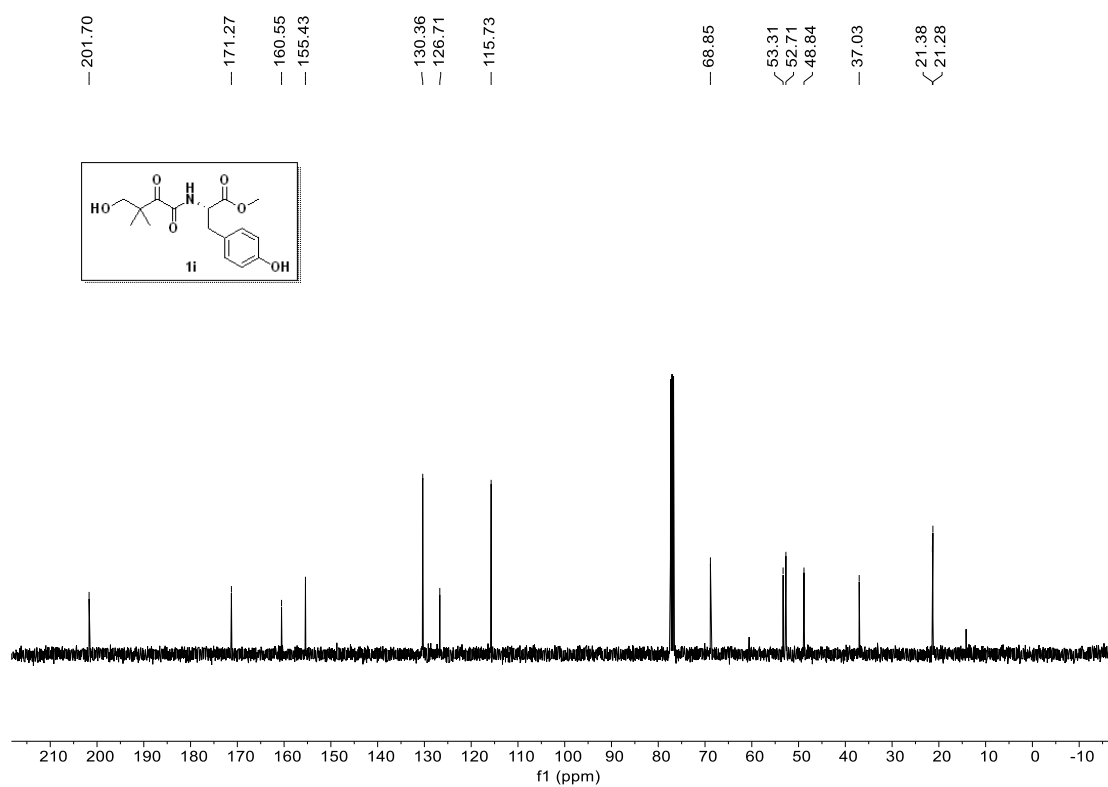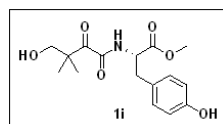

The  $^1\text{H}$  NMR (400 MHz,  $\text{CDCl}_3$ ) spectrum of **1j**

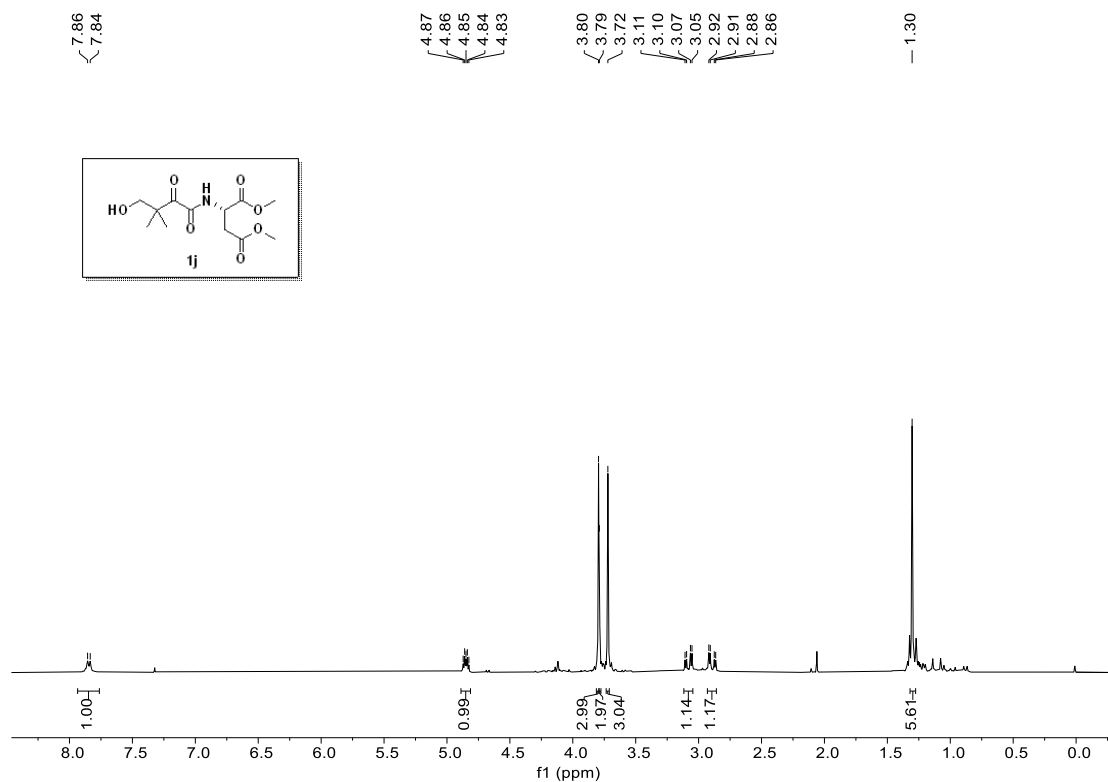

The  $^{13}\text{C}$  NMR (100 MHz,  $\text{CDCl}_3$ ) spectrum of **1j**

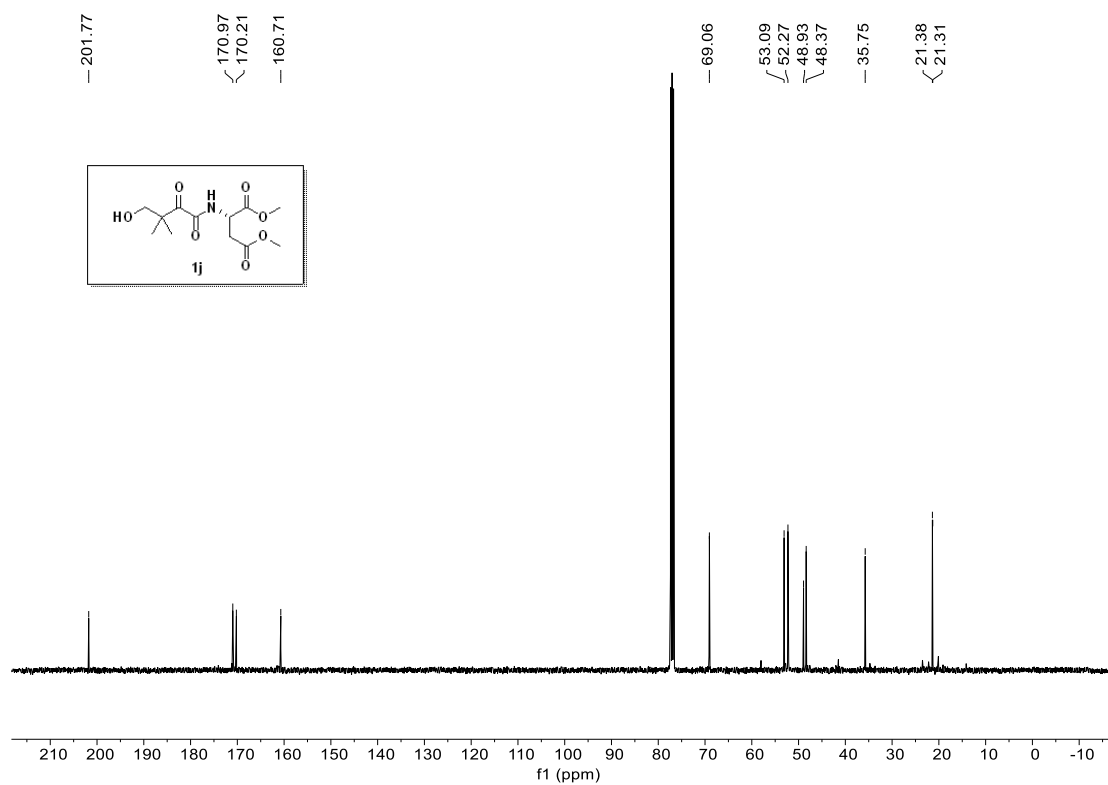

The  $^1\text{H}$  NMR (400 MHz,  $\text{CDCl}_3$ ) spectrum of **1k**

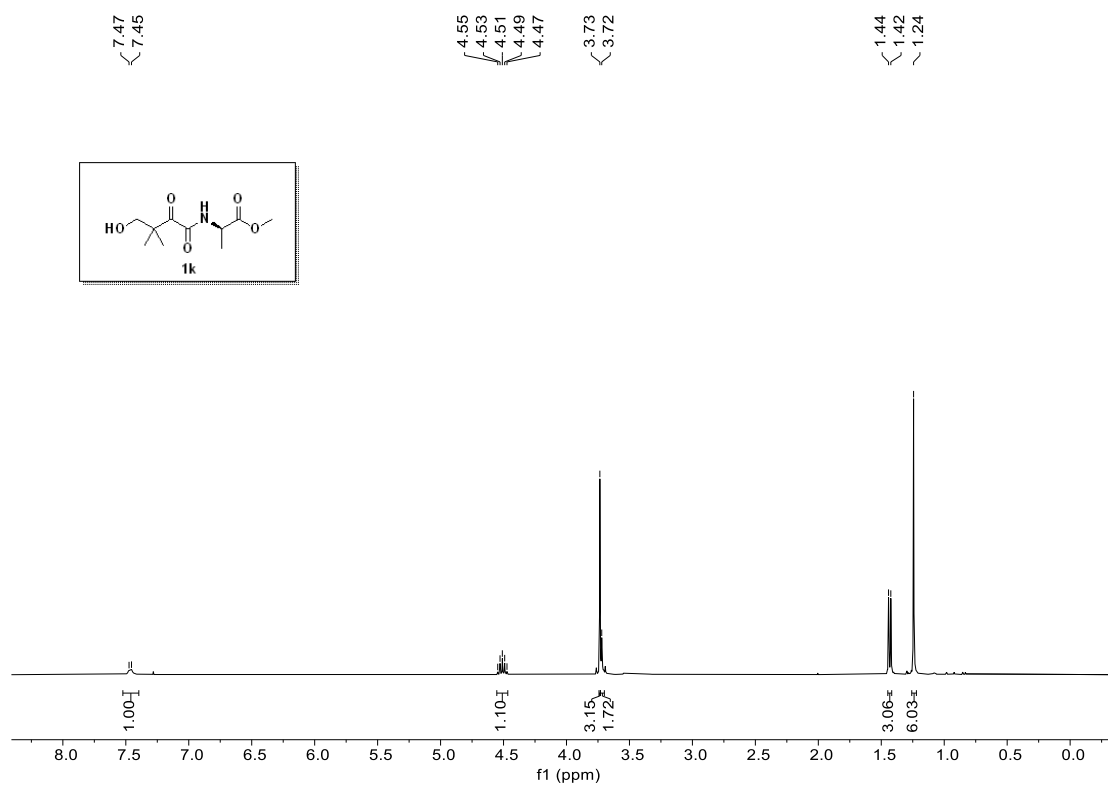

The  $^{13}\text{C}$  NMR (100 MHz,  $\text{CDCl}_3$ ) spectrum of **1k**

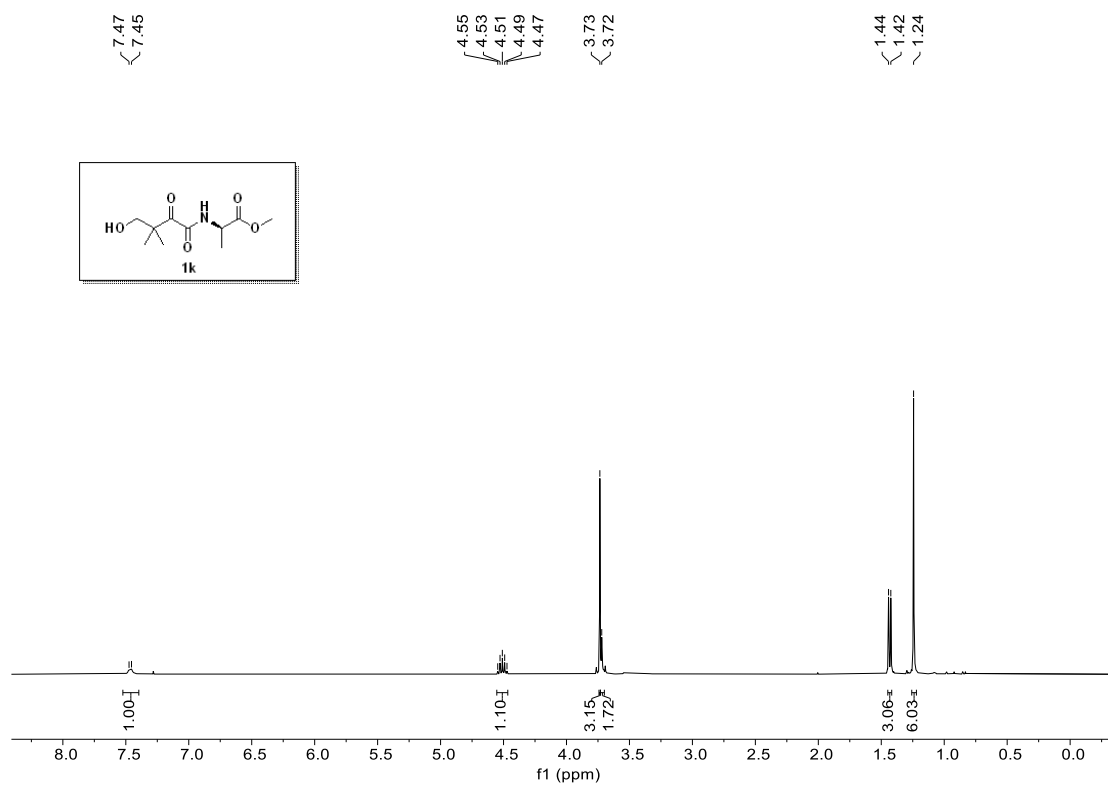

The  $^1\text{H}$  NMR (400 MHz,  $\text{CDCl}_3$ ) spectrum of **2a**

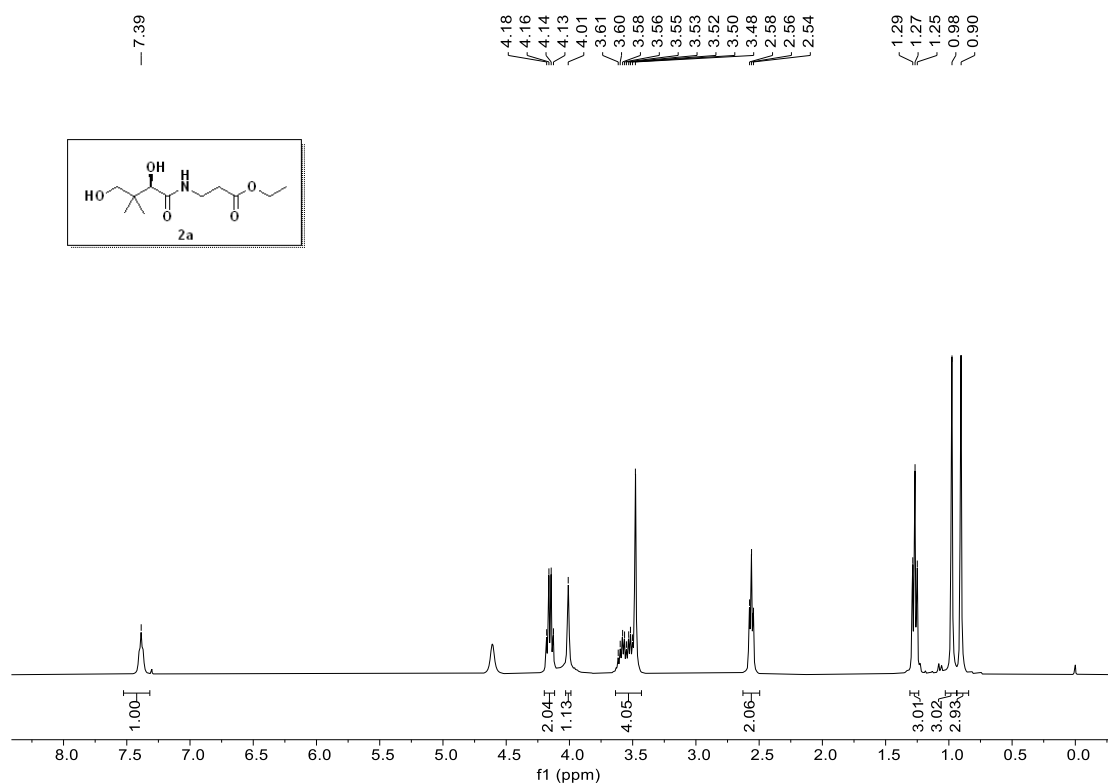

The  $^{13}\text{C}$  NMR (100 MHz,  $\text{CDCl}_3$ ) spectrum of **2a**

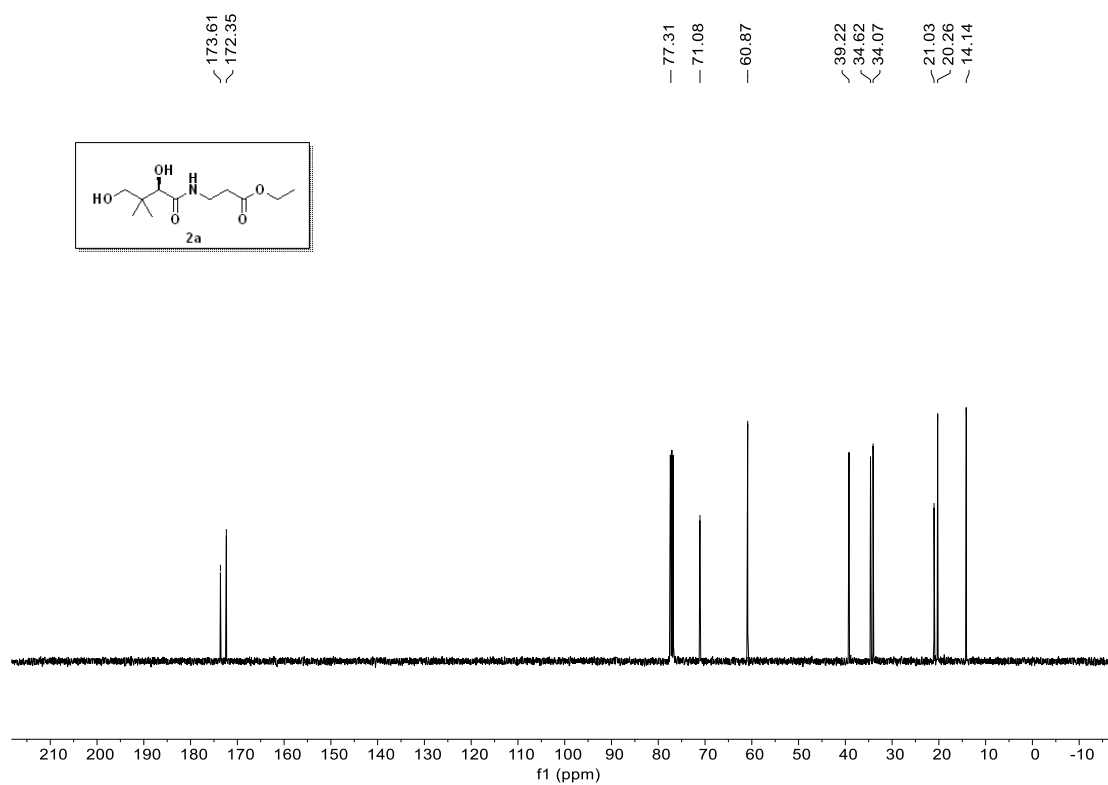

The  $^1\text{H}$  NMR (400 MHz,  $\text{CDCl}_3$ ) spectrum of **2b**

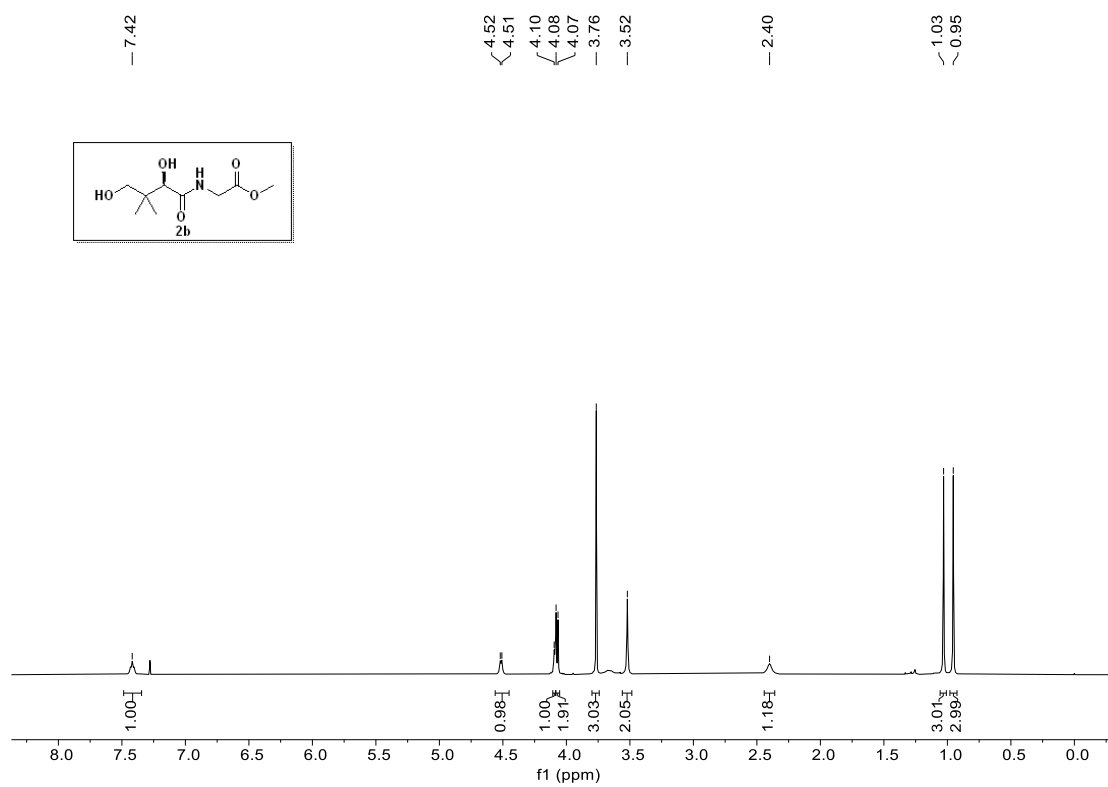

The  $^{13}\text{C}$  NMR (100 MHz,  $\text{CDCl}_3$ ) spectrum of **2b**

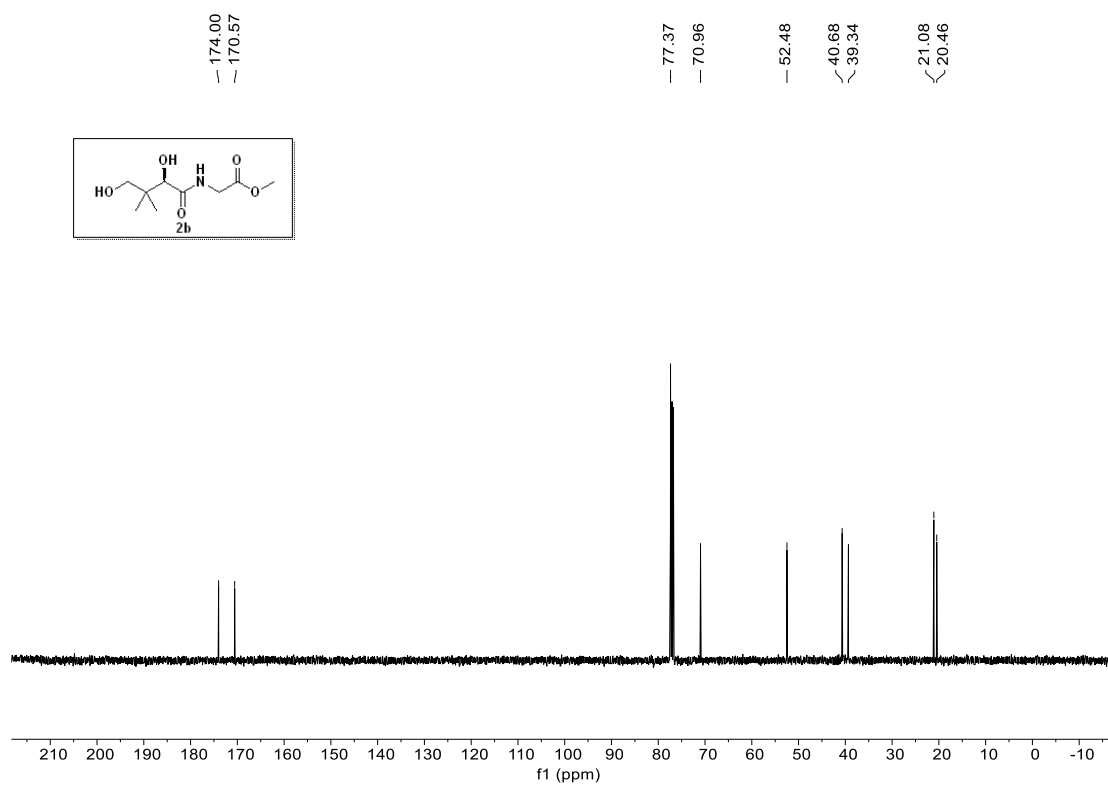



The  $^1\text{H}$  NMR (400 MHz,  $\text{CDCl}_3$ ) spectrum of **2c**

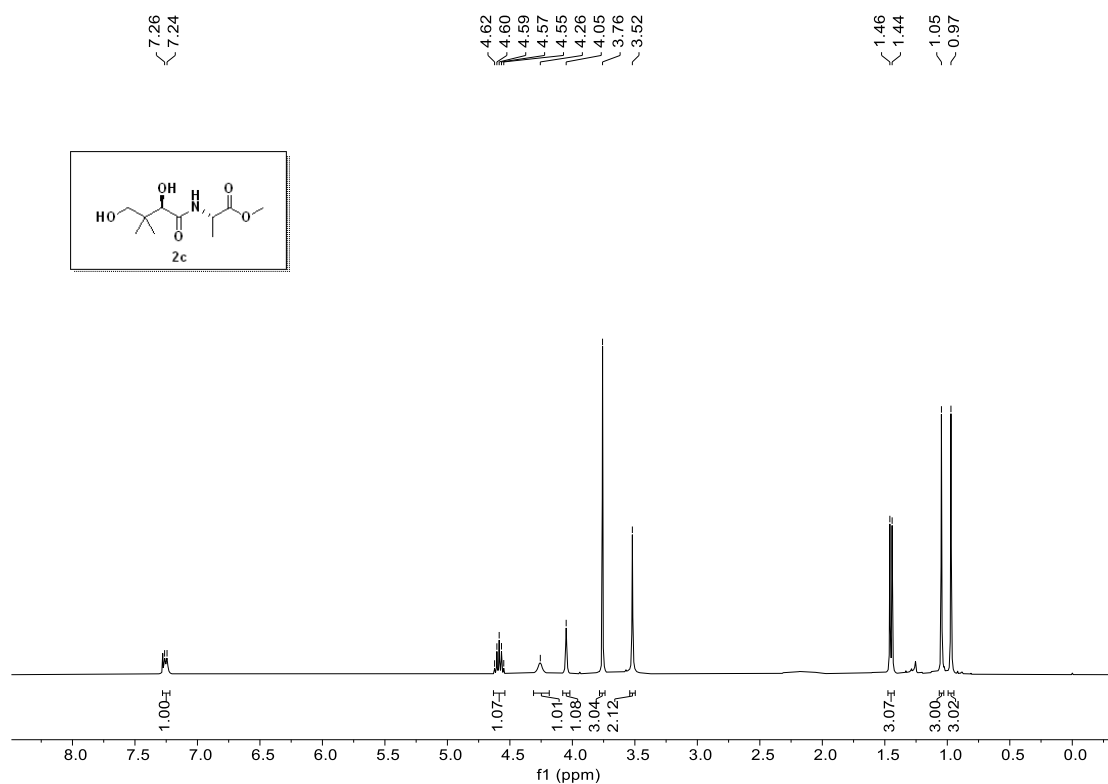

The  $^{13}\text{C}$  NMR (100 MHz,  $\text{CDCl}_3$ ) spectrum of **2c**

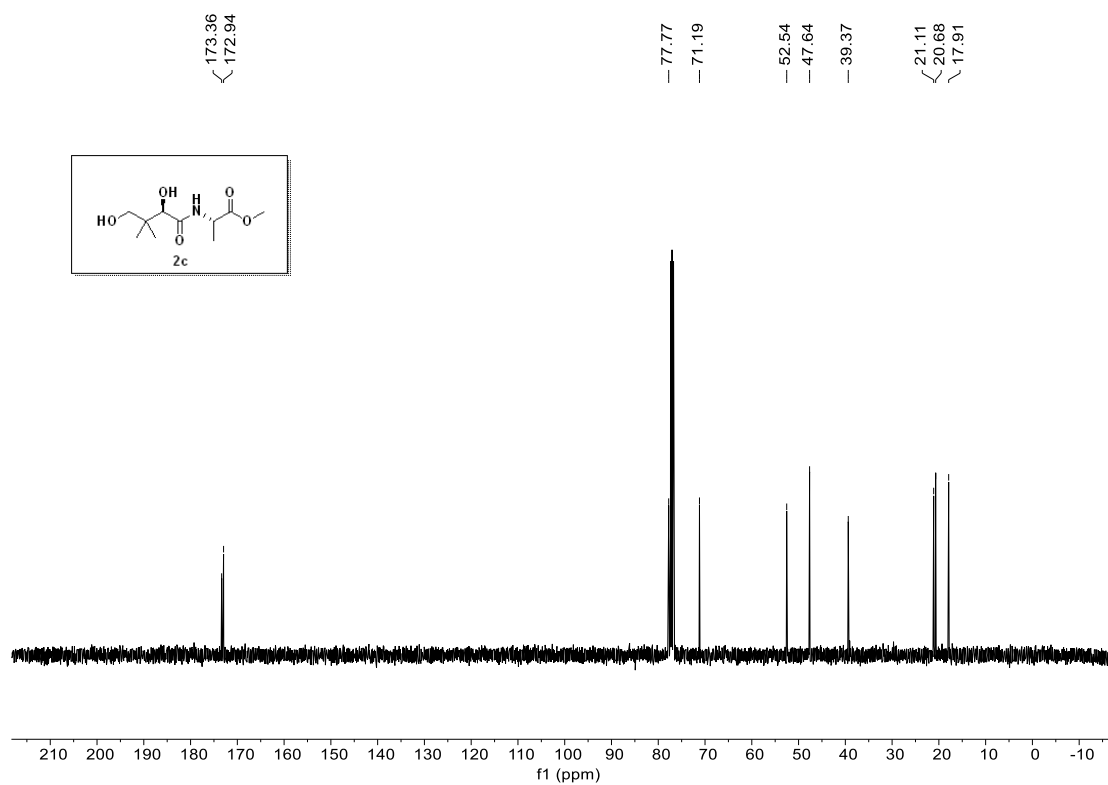

The  $^1\text{H}$  NMR (400 MHz,  $\text{CDCl}_3$ ) spectrum of **2d**

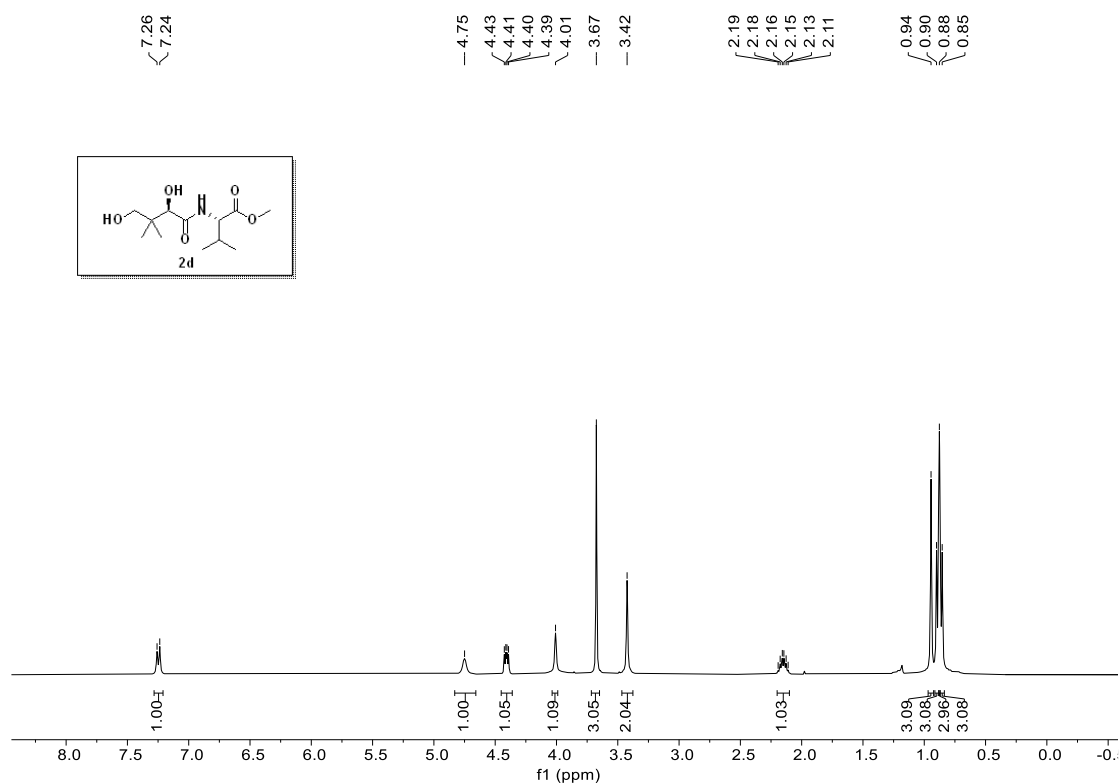

The  $^{13}\text{C}$  NMR (100 MHz,  $\text{CDCl}_3$ ) spectrum of **2d**

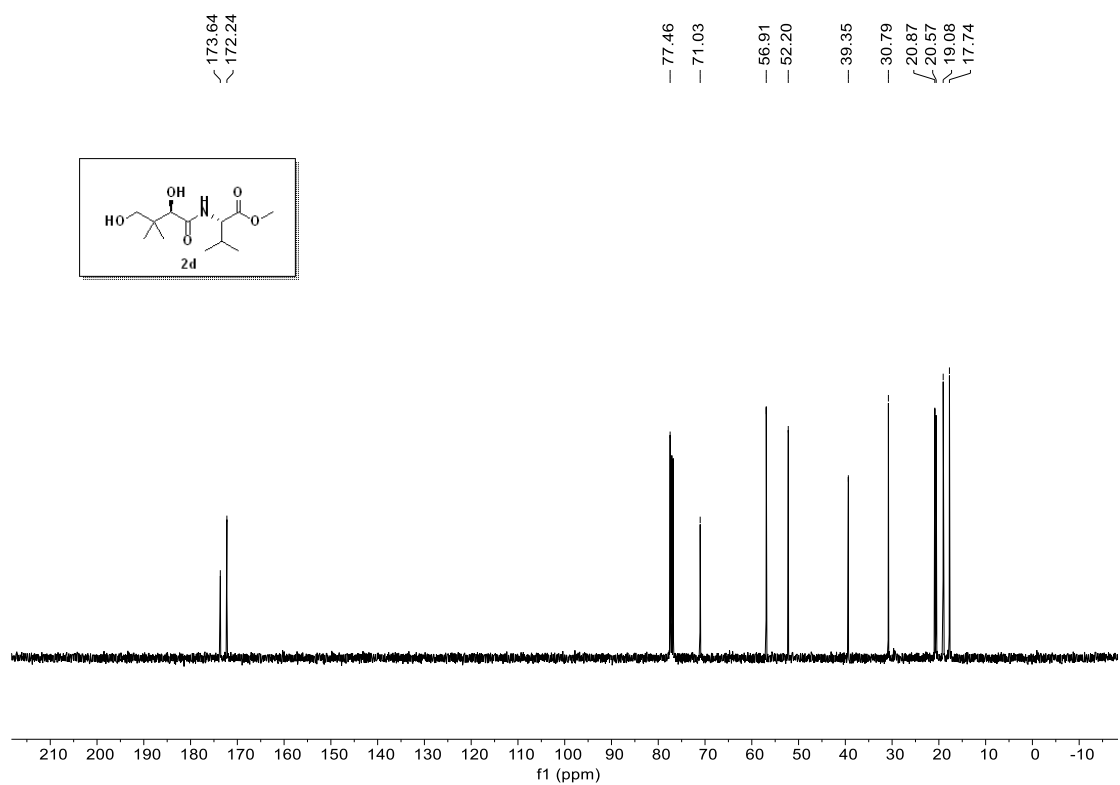

The  $^1\text{H}$  NMR (400 MHz,  $\text{CDCl}_3$ ) spectrum of **2e**

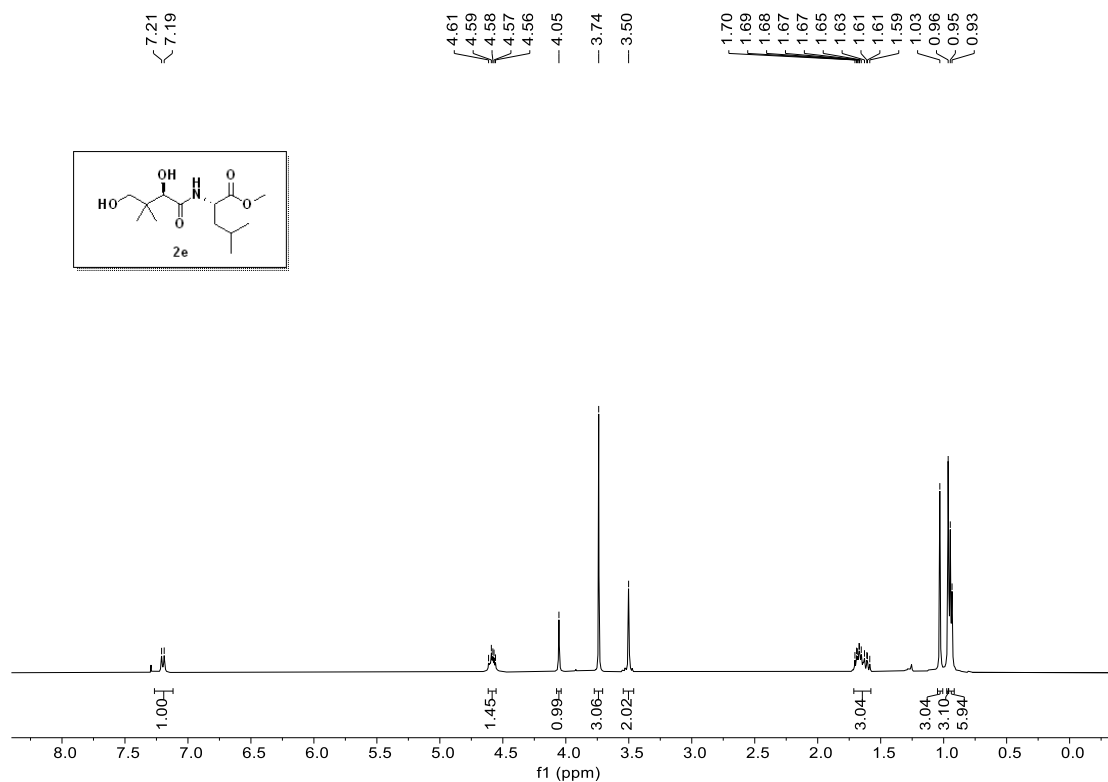

The  $^{13}\text{C}$  NMR (100 MHz,  $\text{CDCl}_3$ ) spectrum of **2e**

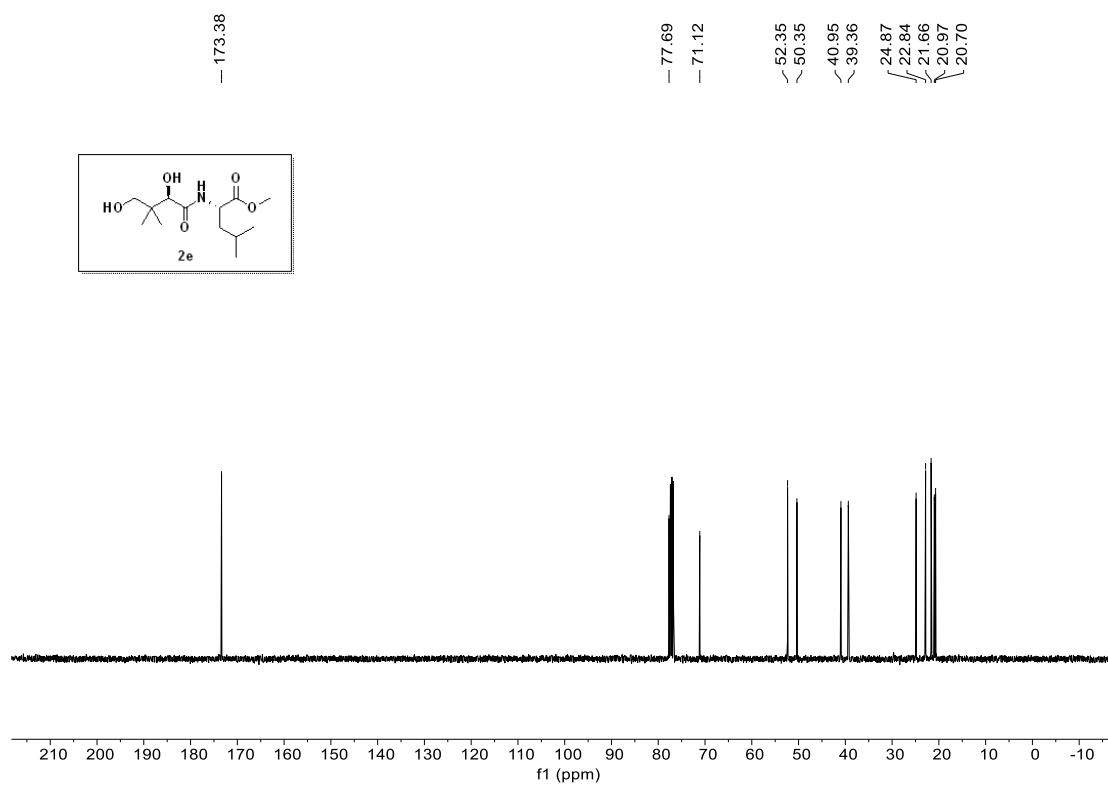

The  $^1\text{H}$  NMR (400 MHz,  $\text{CDCl}_3$ ) spectrum of **2f**

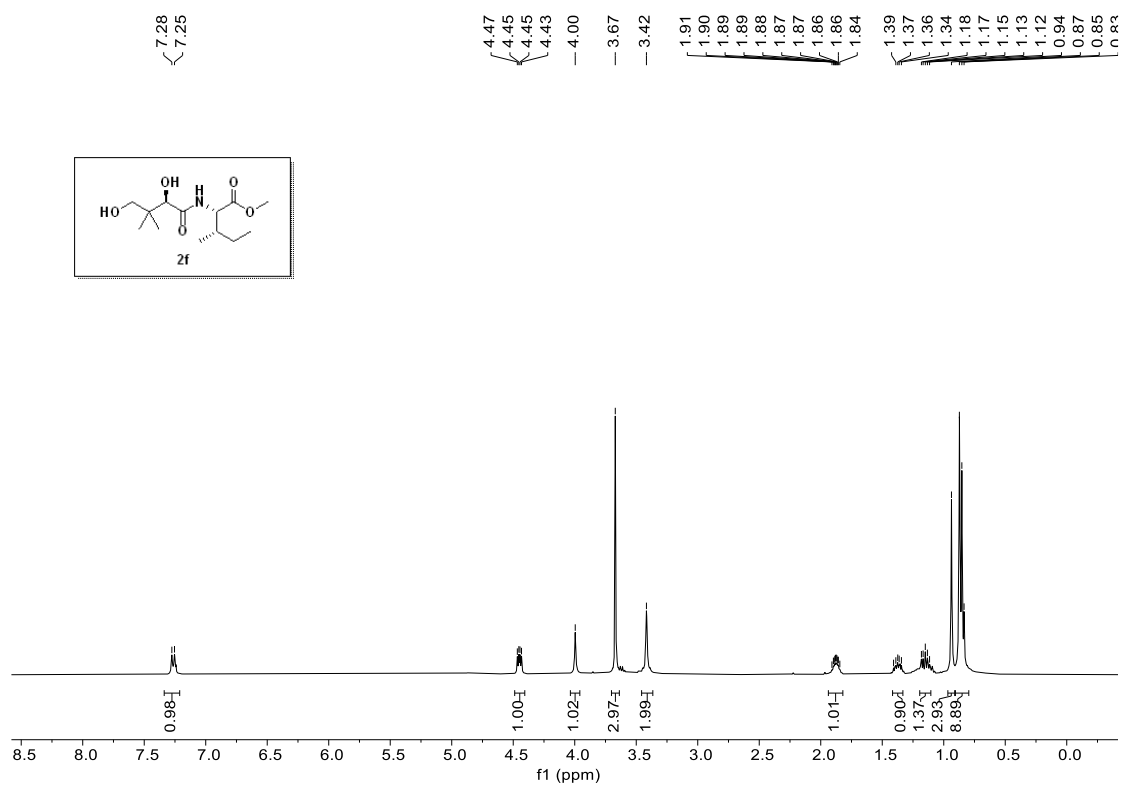

The  $^{13}\text{C}$  NMR (100 MHz,  $\text{CDCl}_3$ ) spectrum of **2f**

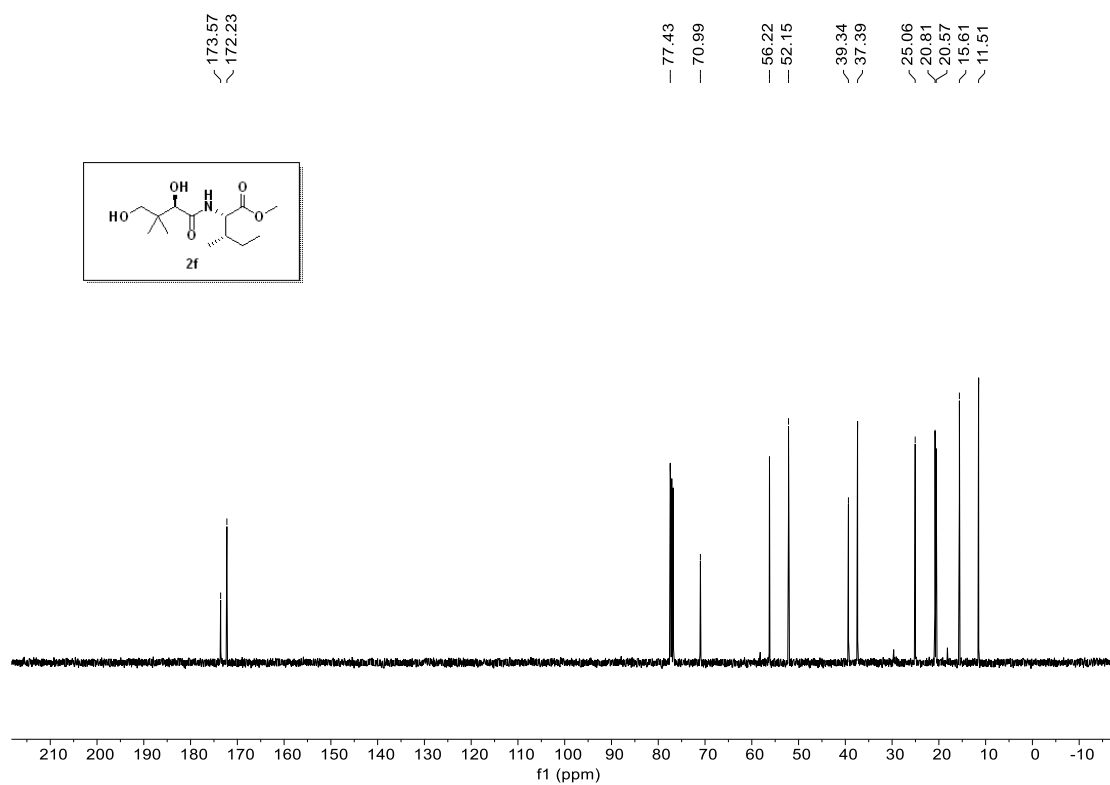

The  $^1\text{H}$  NMR (400 MHz,  $\text{CDCl}_3$ ) spectrum of **2g**

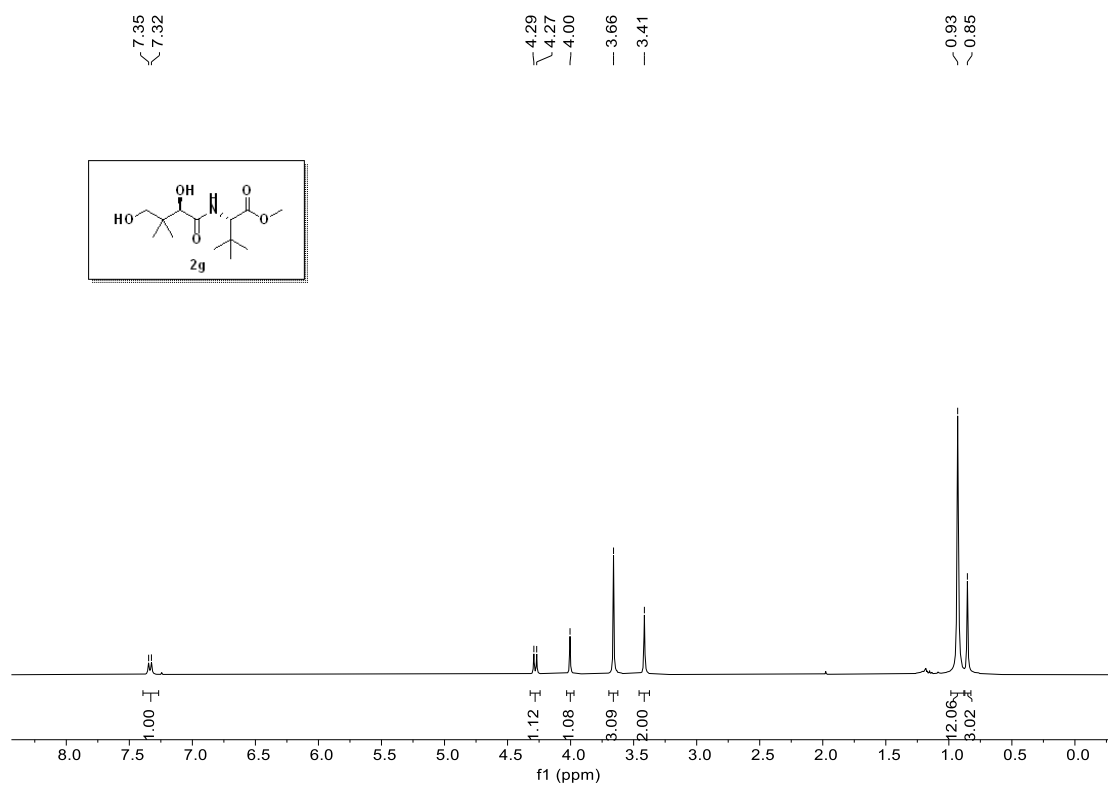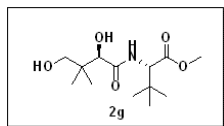

The  $^{13}\text{C}$  NMR (100 MHz,  $\text{CDCl}_3$ ) spectrum of **2g**

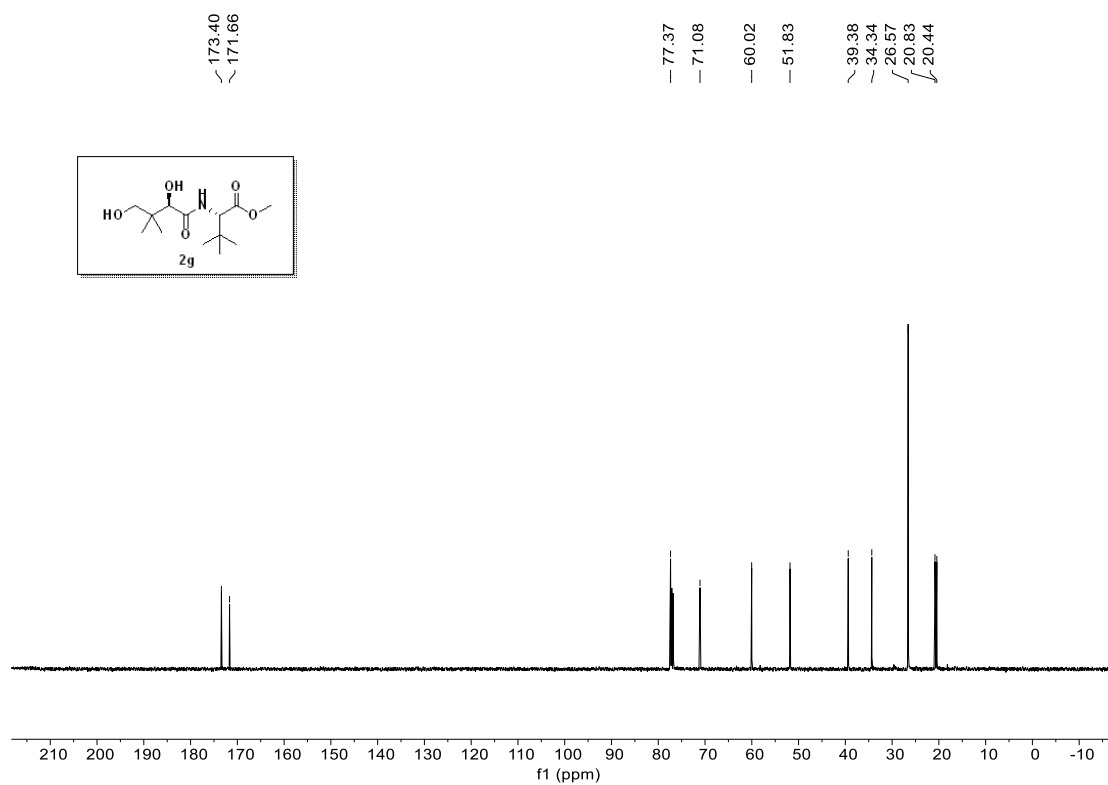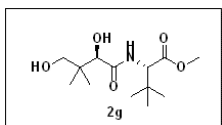

The  $^1\text{H}$  NMR (400 MHz,  $\text{CDCl}_3$ ) spectrum of **2h**

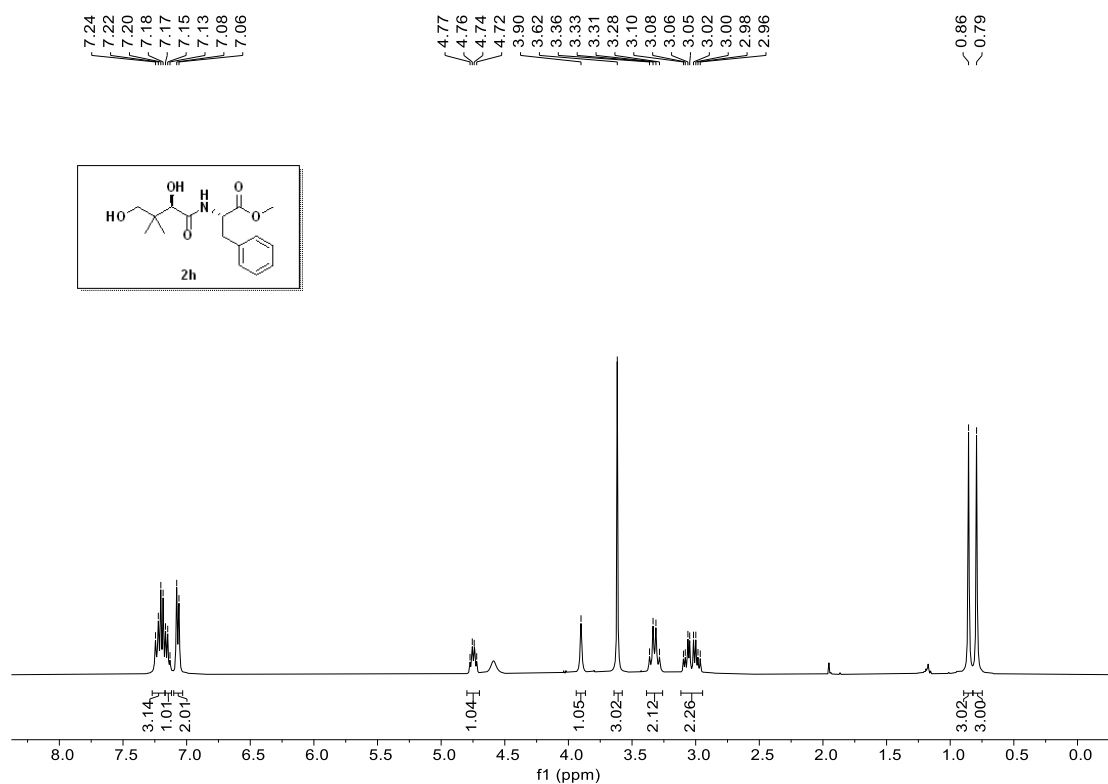

The  $^{13}\text{C}$  NMR (100 MHz,  $\text{CDCl}_3$ ) spectrum of **2h**

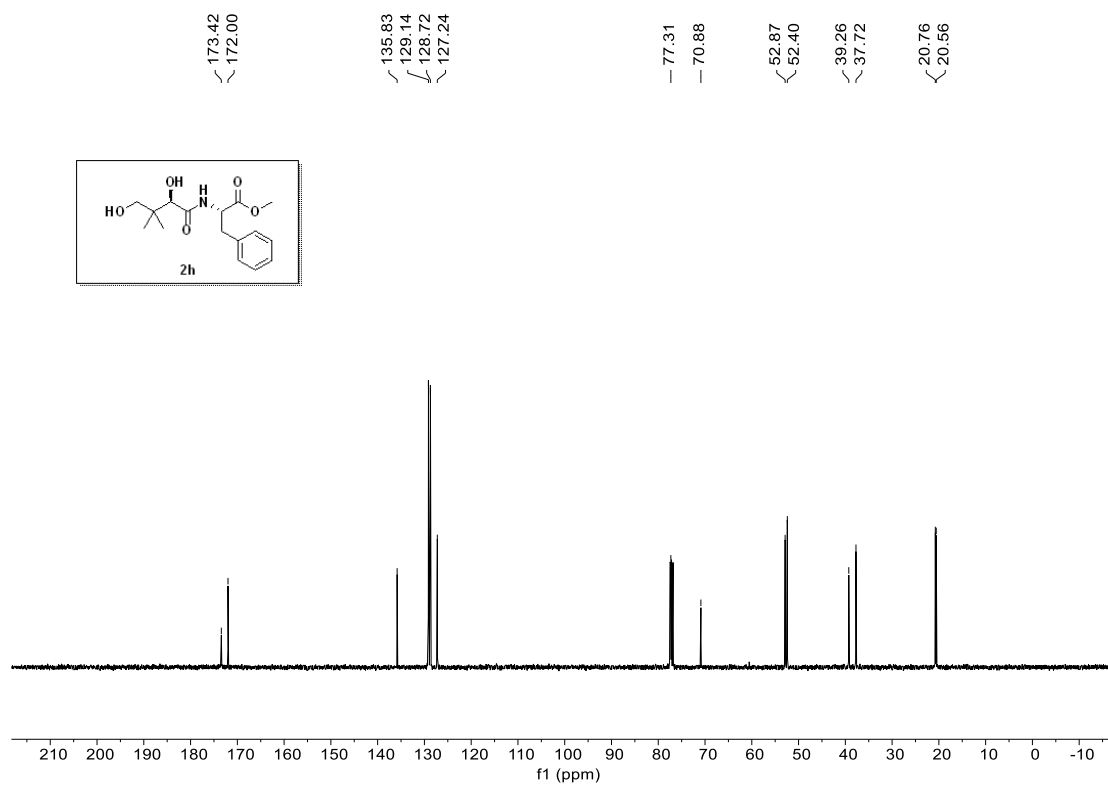

The  $^1\text{H}$  NMR (400 MHz,  $\text{CDCl}_3$ ) spectrum of **2i**

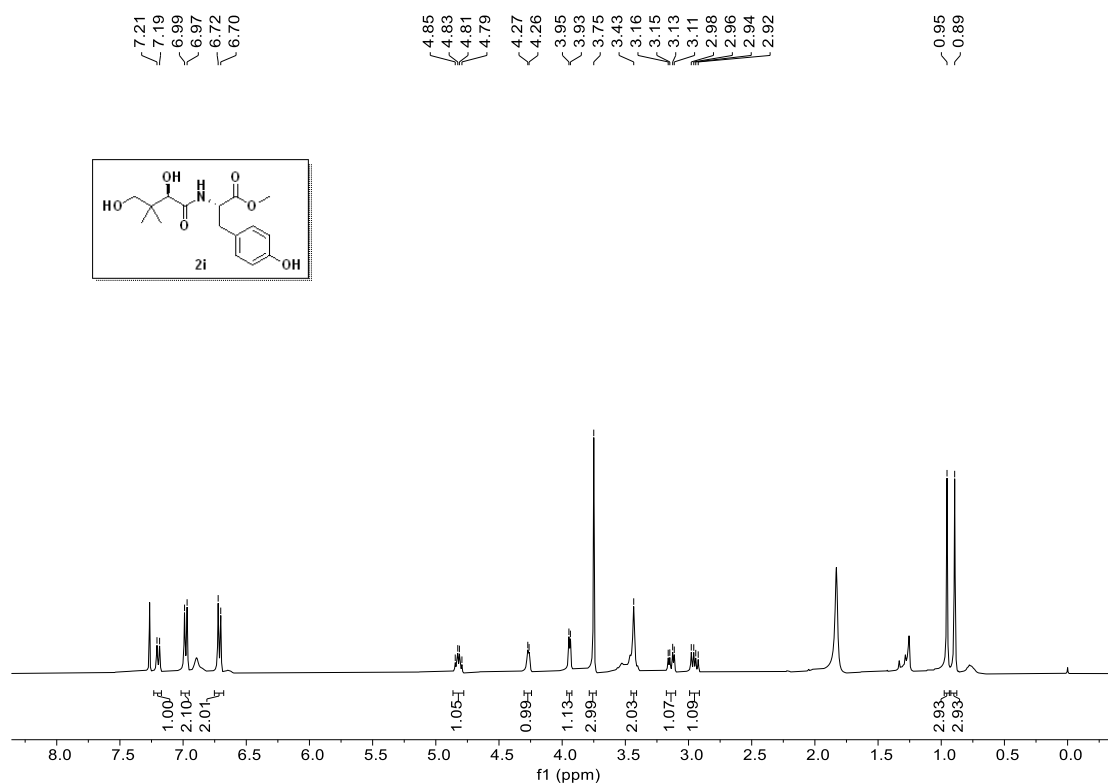

The  $^{13}\text{C}$  NMR (100 MHz,  $\text{CDCl}_3$ ) spectrum of **2i**

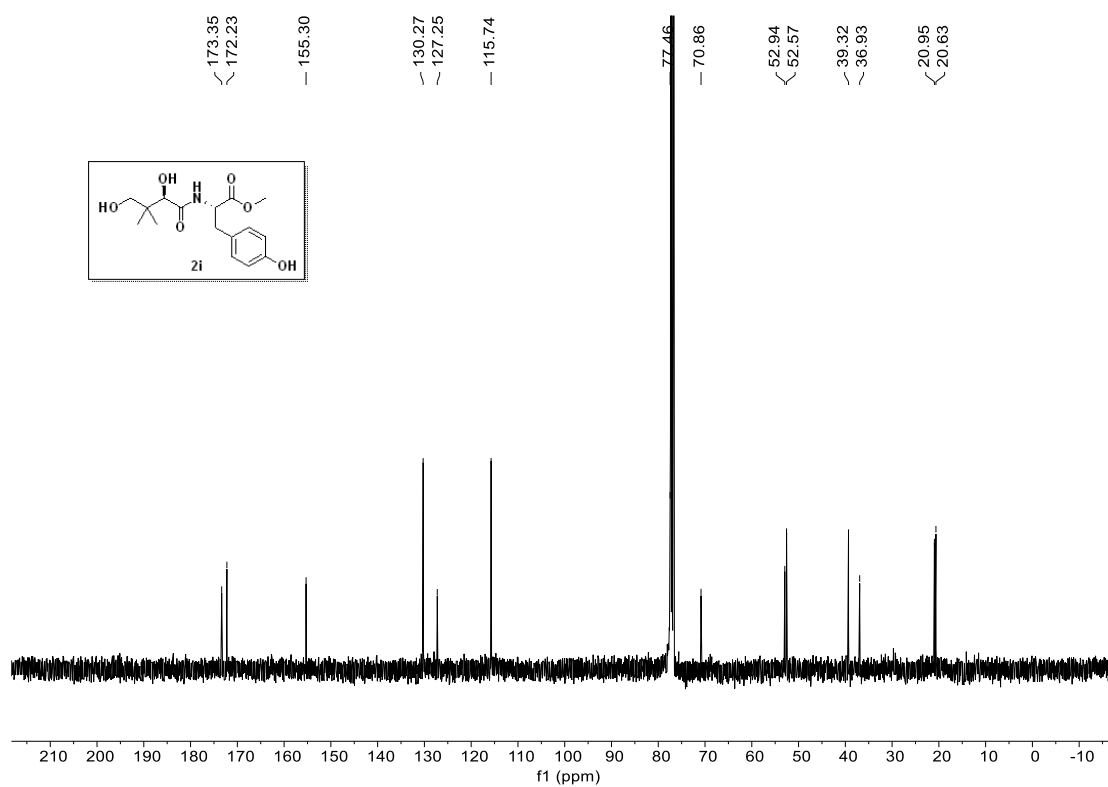

The  $^1\text{H}$  NMR (400 MHz,  $\text{CDCl}_3$ ) spectrum of **2j**

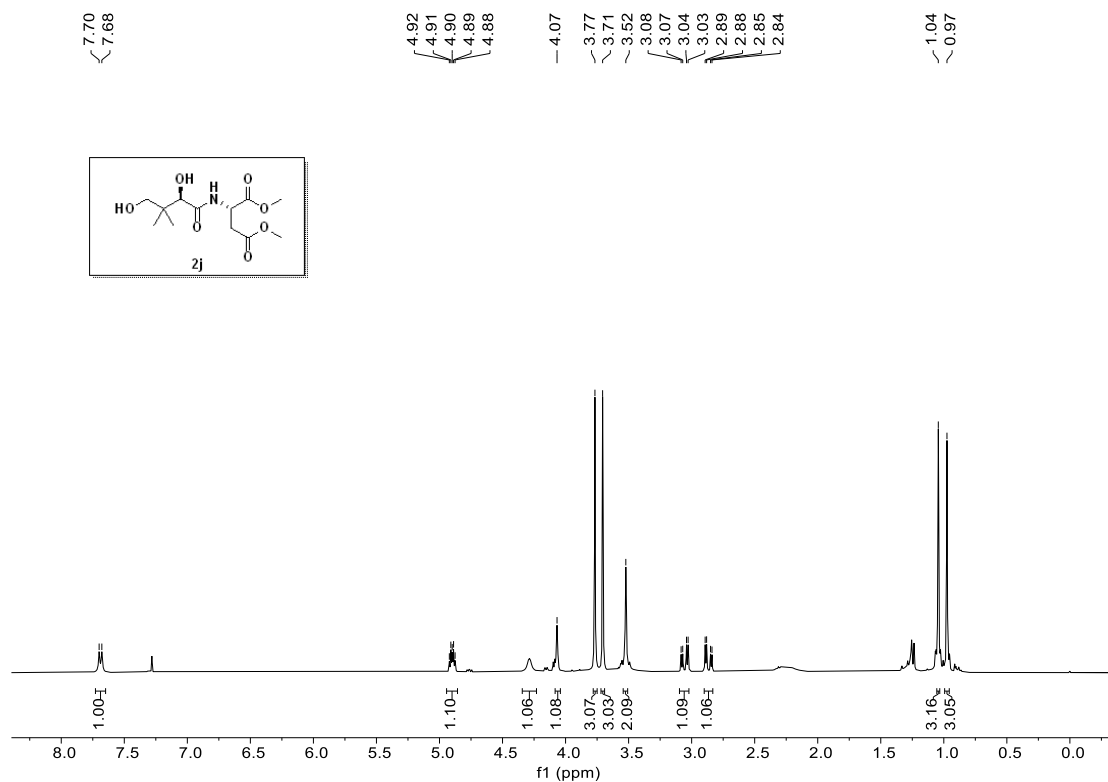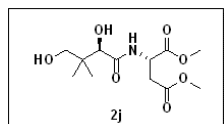

The  $^{13}\text{C}$  NMR (100 MHz,  $\text{CDCl}_3$ ) spectrum of **2j**

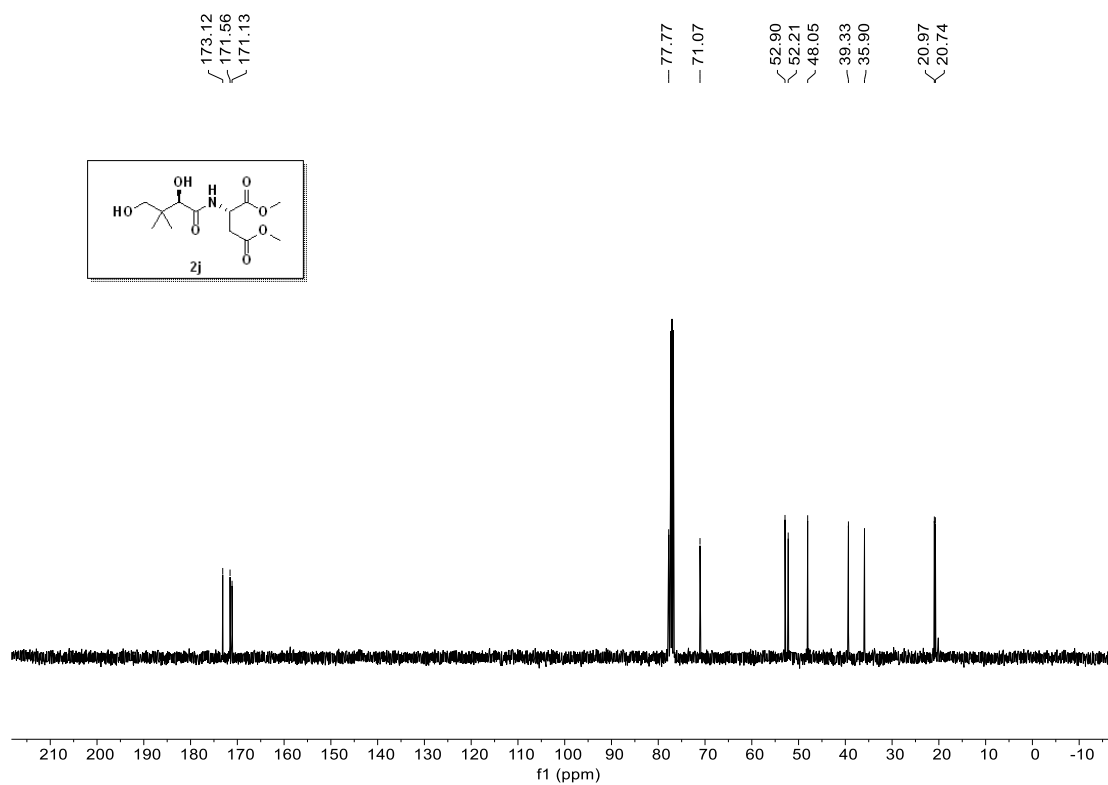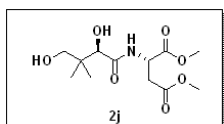



The  $^1\text{H}$  NMR (400 MHz,  $\text{CDCl}_3$ ) spectrum of **2k**

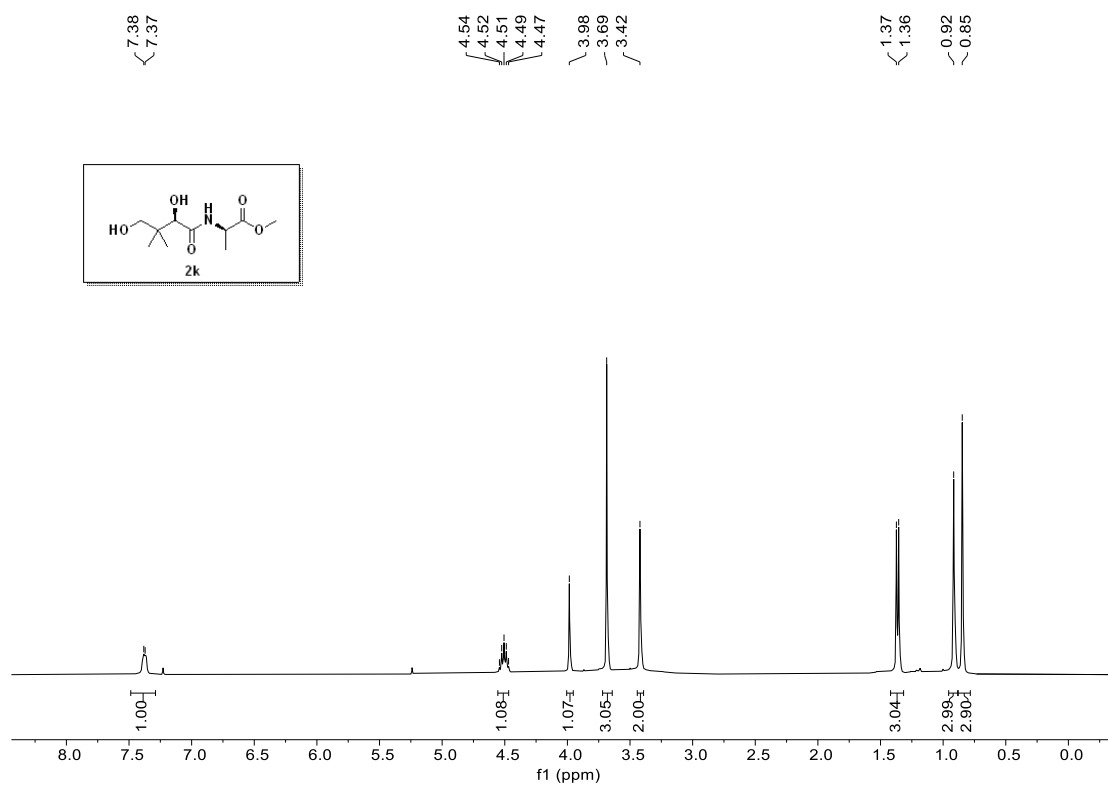

The  $^{13}\text{C}$  NMR (100 MHz,  $\text{CDCl}_3$ ) spectrum of **2k**

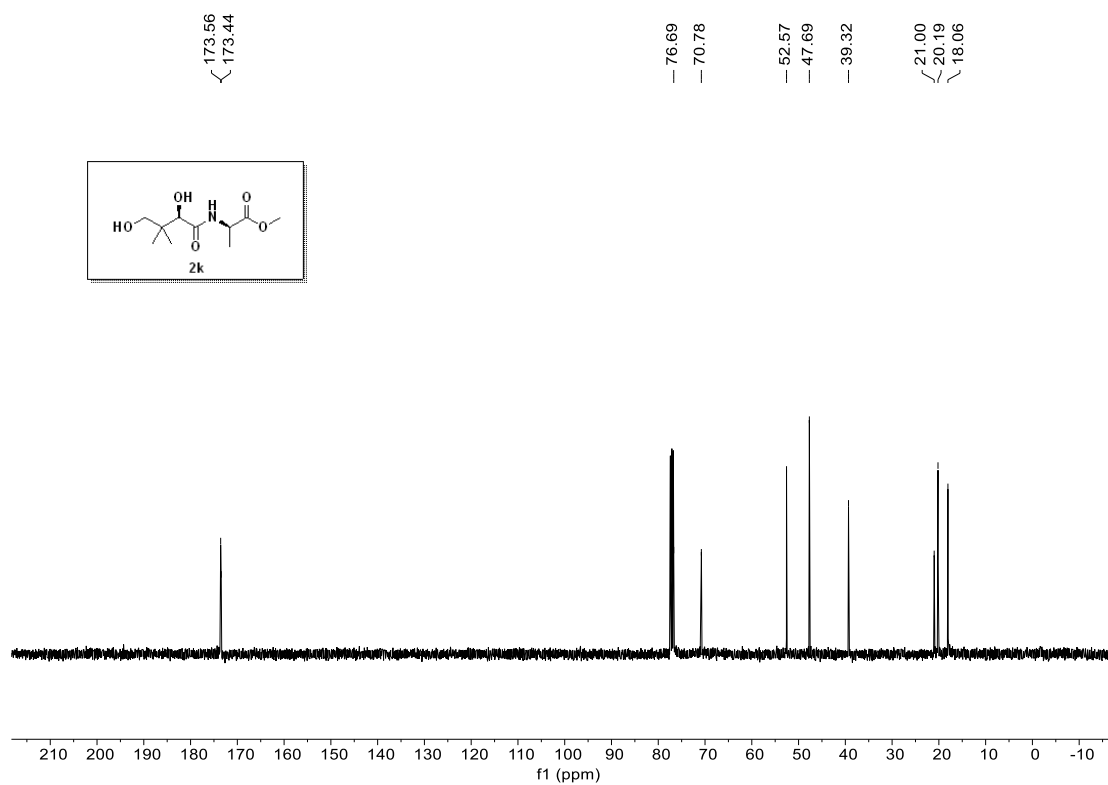

The  $^1\text{H}$  NMR (400 MHz,  $\text{CDCl}_3$ ) spectrum of **D-PaA**

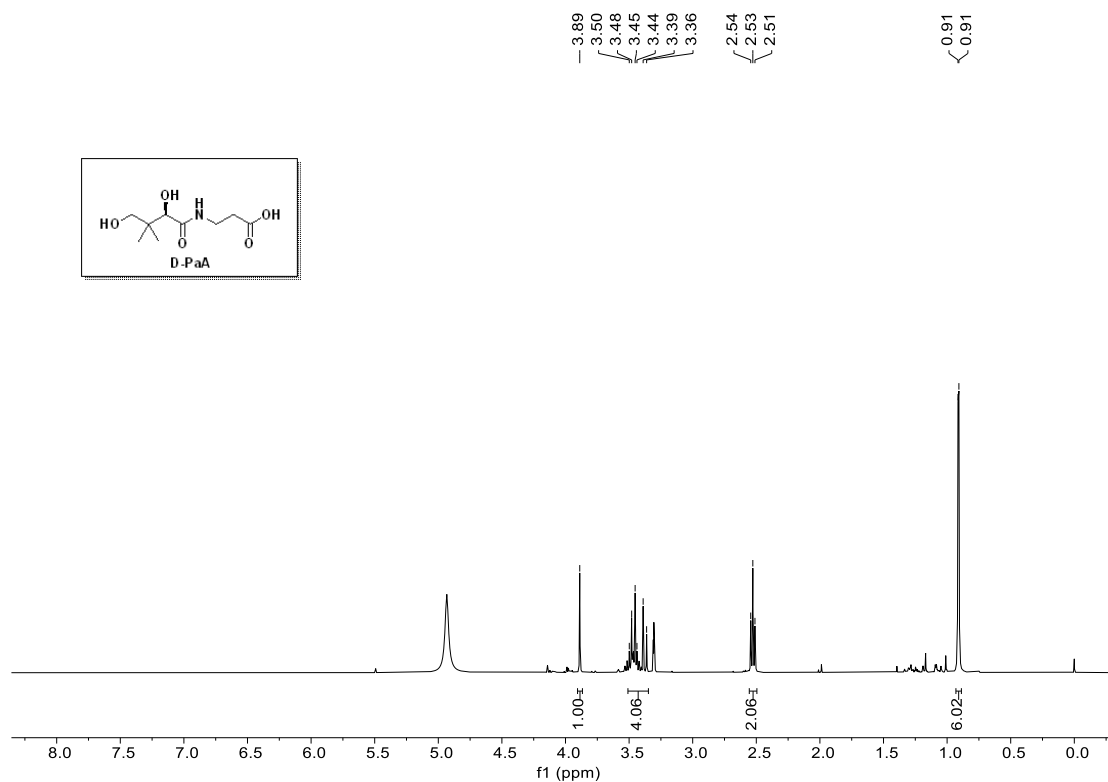

The  $^{13}\text{C}$  NMR (100 MHz,  $\text{CDCl}_3$ ) spectrum of **D-PaA**

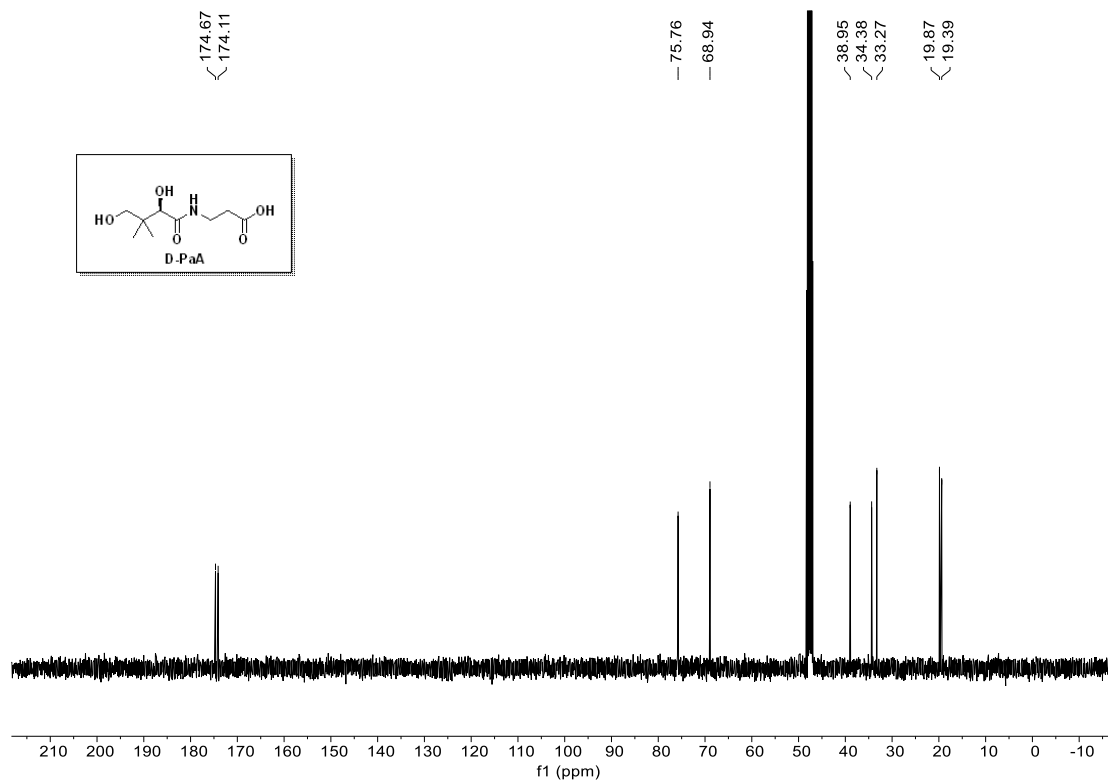

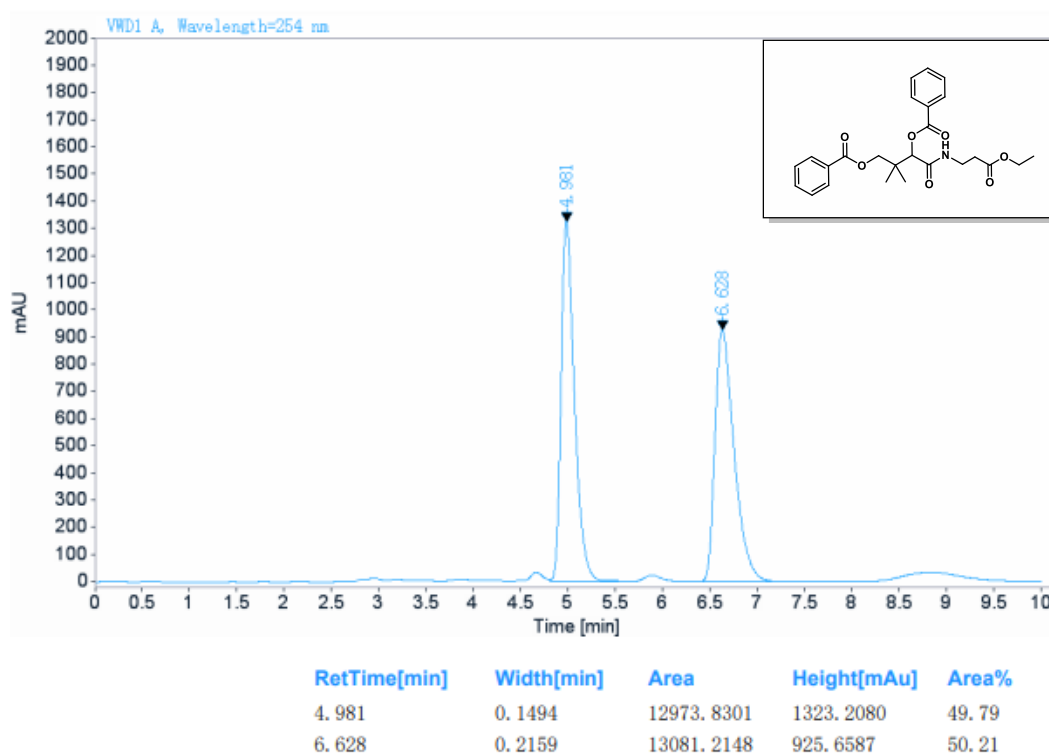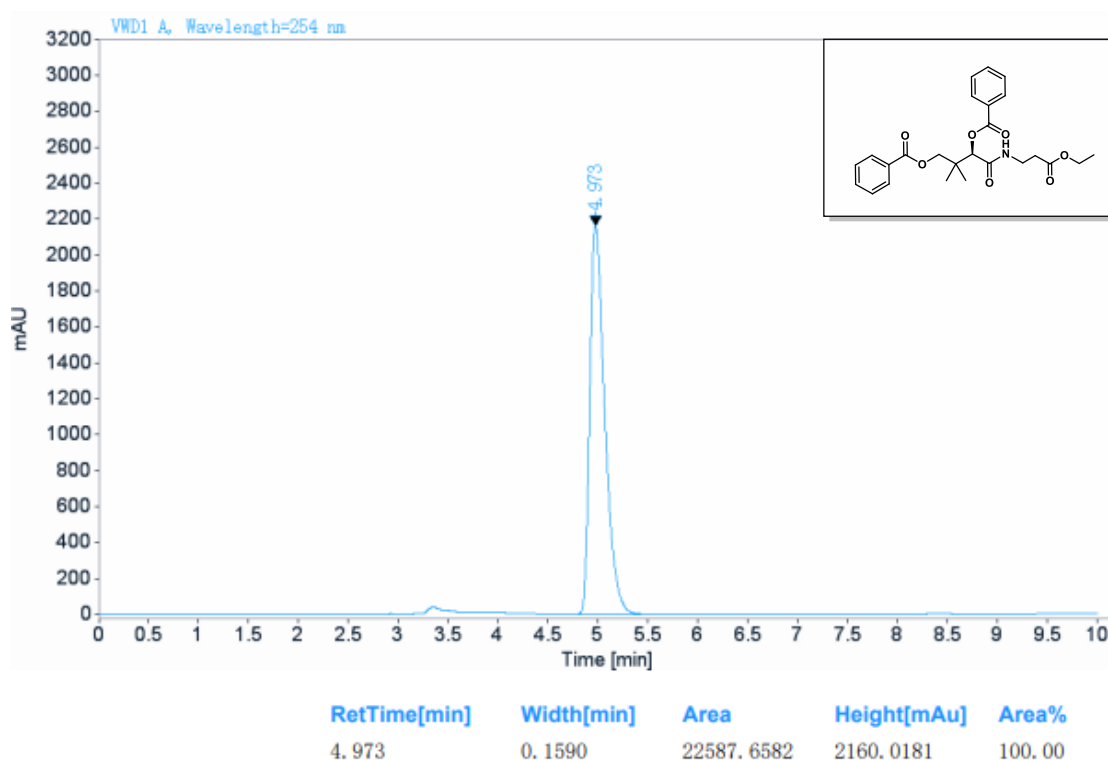

The top spectrum is the chiral HPLC analysis of the benzoylated authentic standard **2a**, synthesized through  $\text{NaBH}_4$ -mediated reduction of **1a** and benzoylation. The bottom spectrum is the chiral HPLC analysis of the benzoylated **2a**, synthesized through *E. coli* (pET28a-M3/pACYCDuet-1-GDH)-catalyzed reduction of **1a** and benzoylation.

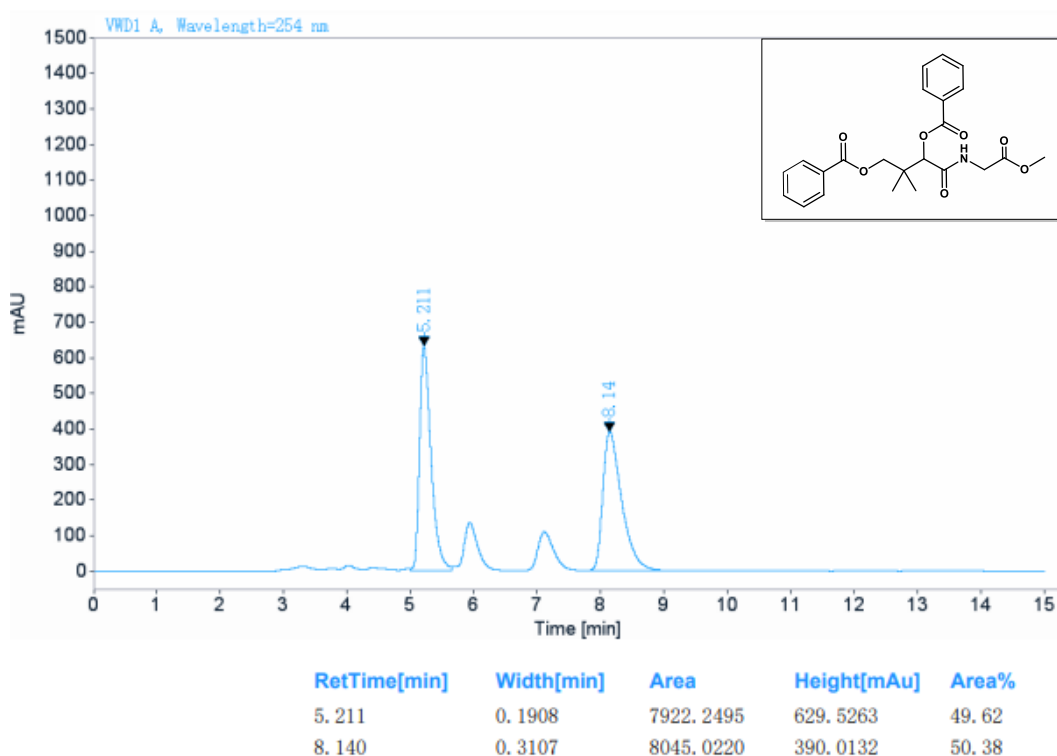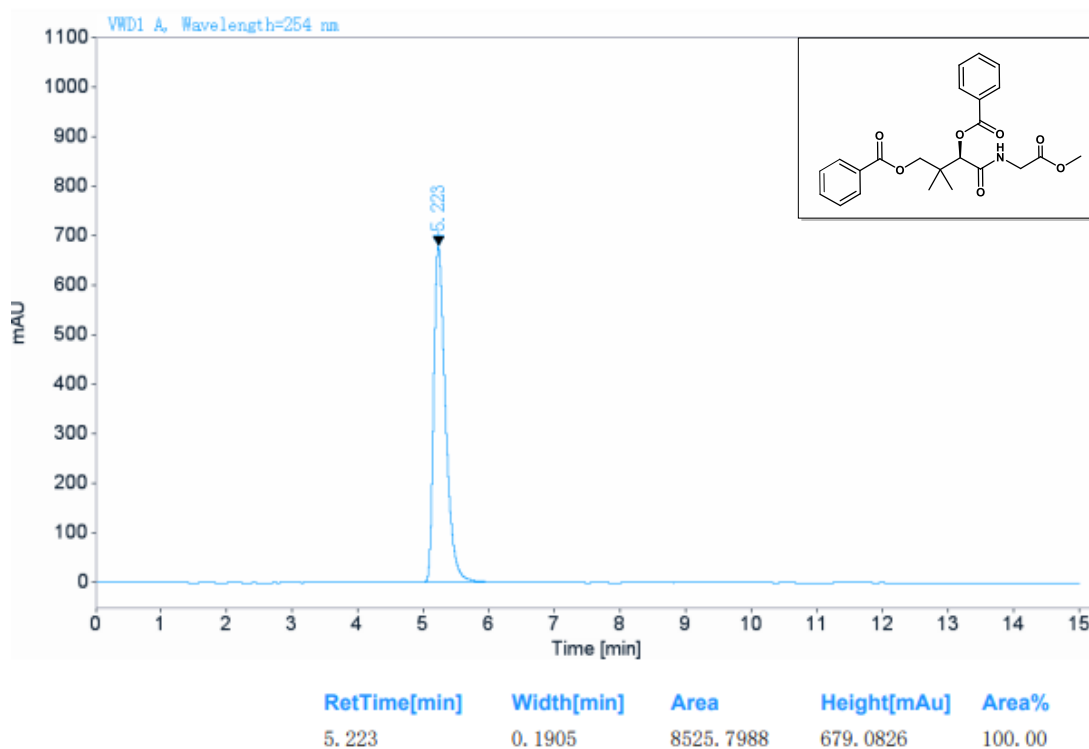

The top spectrum is the chiral HPLC analysis of the benzoylated authentic standard **2b**, synthesized through  $\text{NaBH}_4$ -mediated reduction of **1b** and benzoylation. The bottom spectrum is the chiral HPLC analysis of the benzoylated **2b**, synthesized through *E. coli* (pET28a-M3/pACYCDuet-1-GDH)-catalyzed reduction of **1b** and benzoylation.

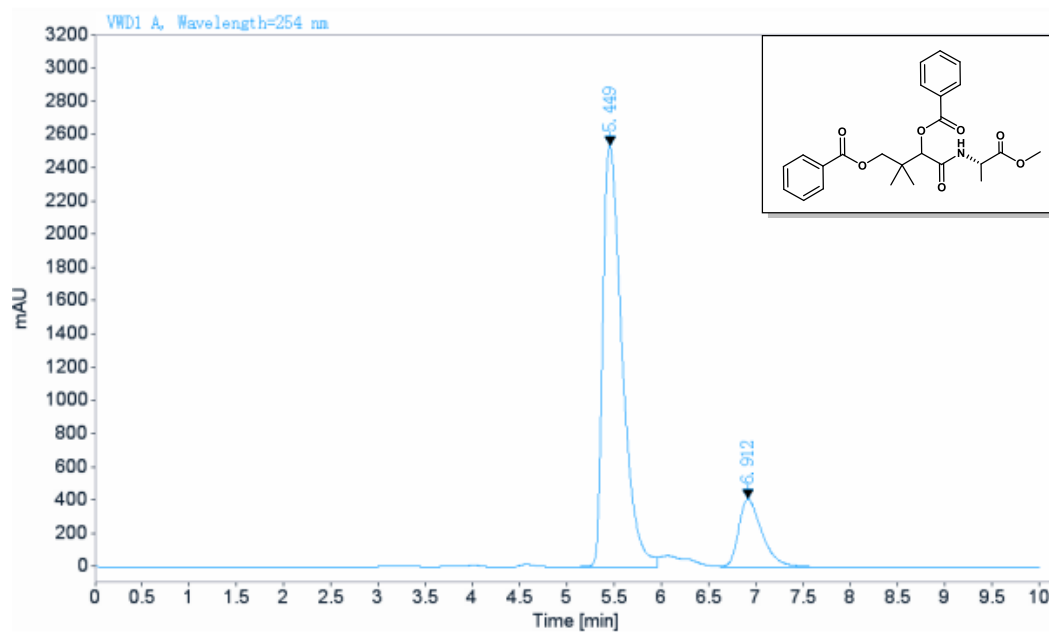

| RetTime[min] | Width[min] | Area       | Height[mAu] | Area% |
|--------------|------------|------------|-------------|-------|
| 5.449        | 0.2178     | 36012.5000 | 2533.8787   | 83.62 |
| 6.912        | 0.2631     | 7052.3975  | 407.1066    | 16.38 |

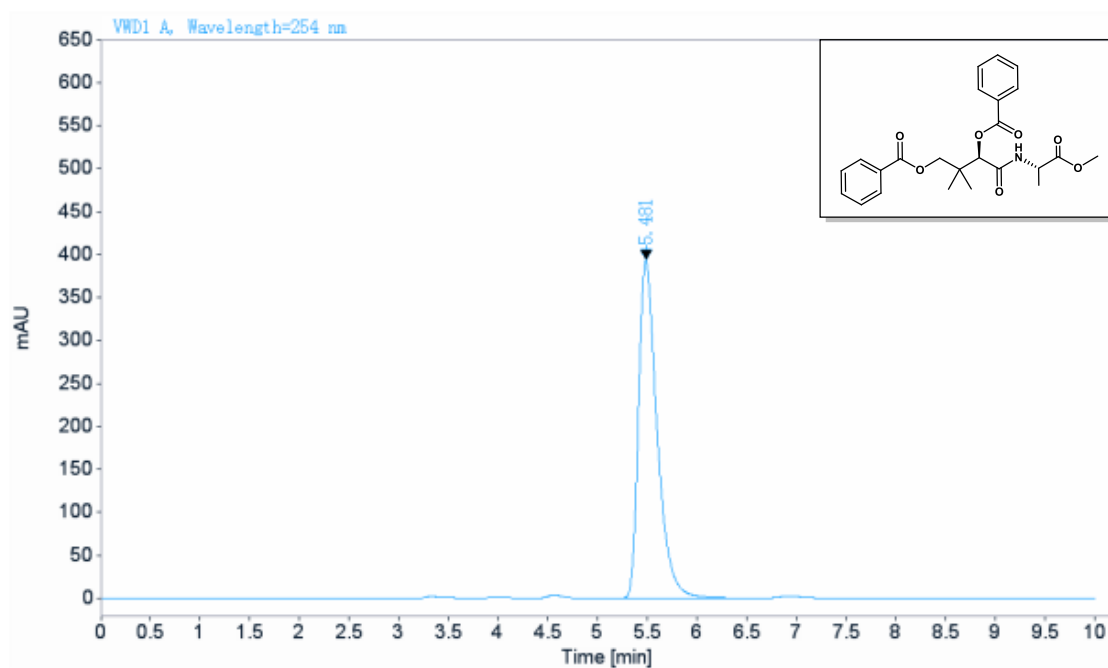

| RetTime[min] | Width[min] | Area      | Height[mAu] | Area%  |
|--------------|------------|-----------|-------------|--------|
| 5.481        | 0.1954     | 5102.7310 | 393.2765    | 100.00 |

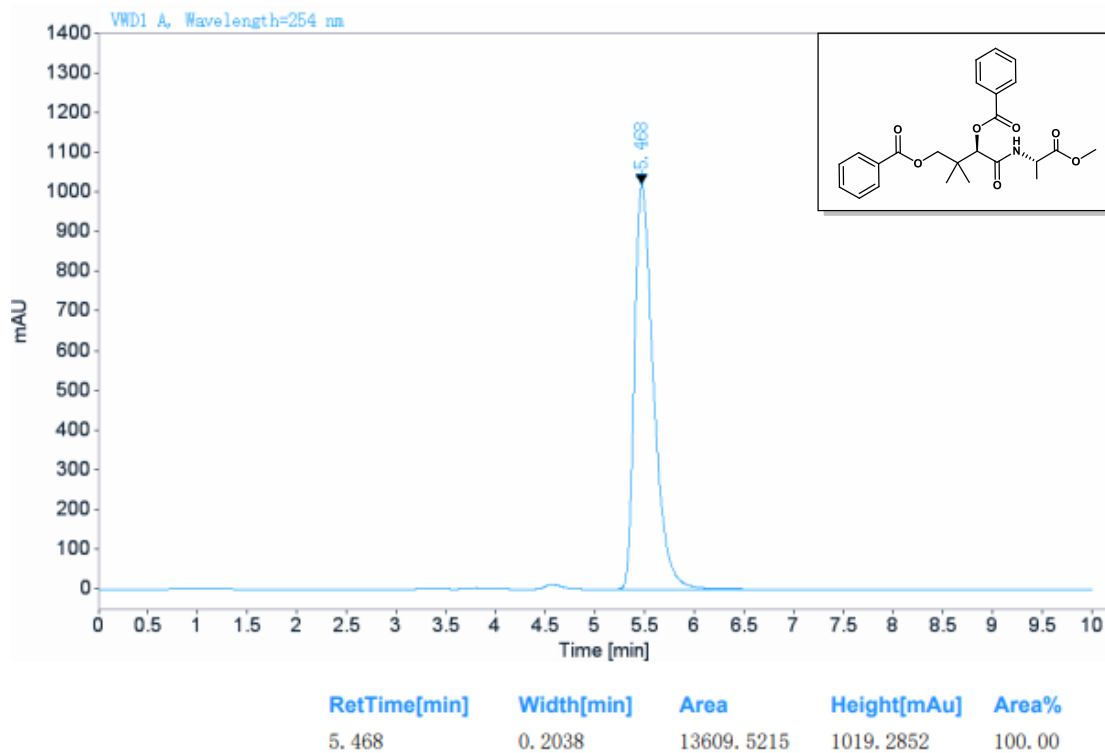

The top spectrum is the chiral HPLC analysis of the benzoylated authentic standard **2c**, synthesized through  $\text{NaBH}_4$ -mediated reduction of **1c** and benzylation. The middle spectrum is the chiral HPLC analysis of the benzoylated authentic standard **2c**, synthesized through the condensation between (*R*)-pantolactone with L-alanine methyl ester, followed by benzylation. The bottom spectrum is the chiral HPLC analysis of the benzoylated **2c**, synthesized through *E. coli* (pET28a-M3/pACYCDuet-1-GDH)-catalyzed reduction of **1c** and benzylation.

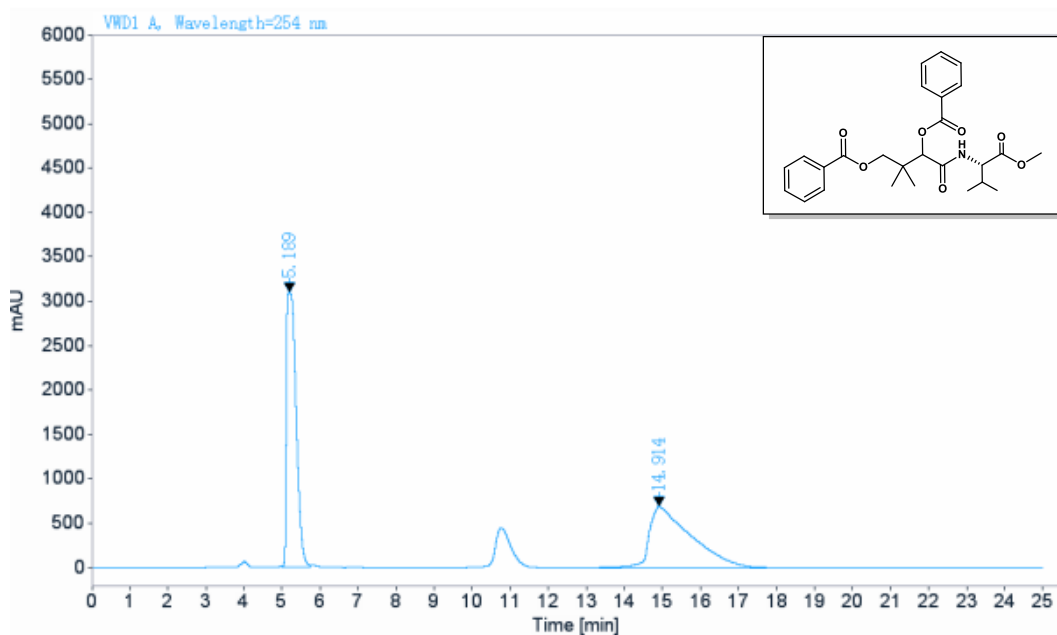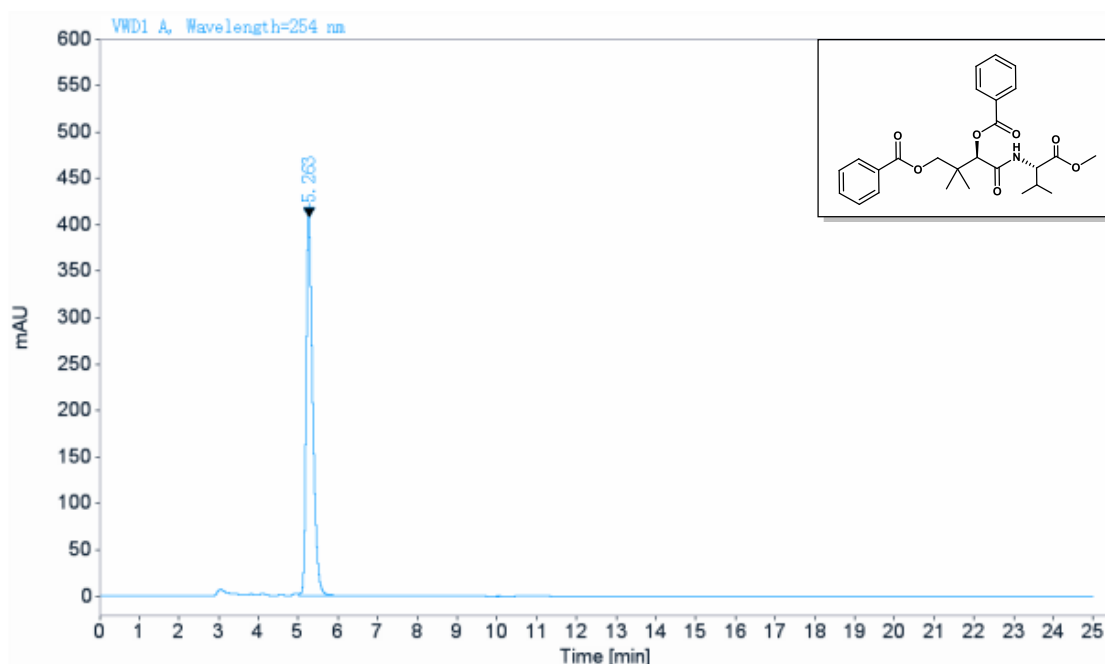

The top spectrum is the chiral HPLC analysis of the benzoylated authentic standard **2d**, synthesized through NaBH<sub>4</sub>-mediated reduction of **1d** and benzoylation. The bottom spectrum is the chiral HPLC analysis of the benzoylated **2d**, synthesized through *E. coli* (pET28a-M3/pACYCDuet-1-GDH)-catalyzed reduction of **1d** and benzoylation.

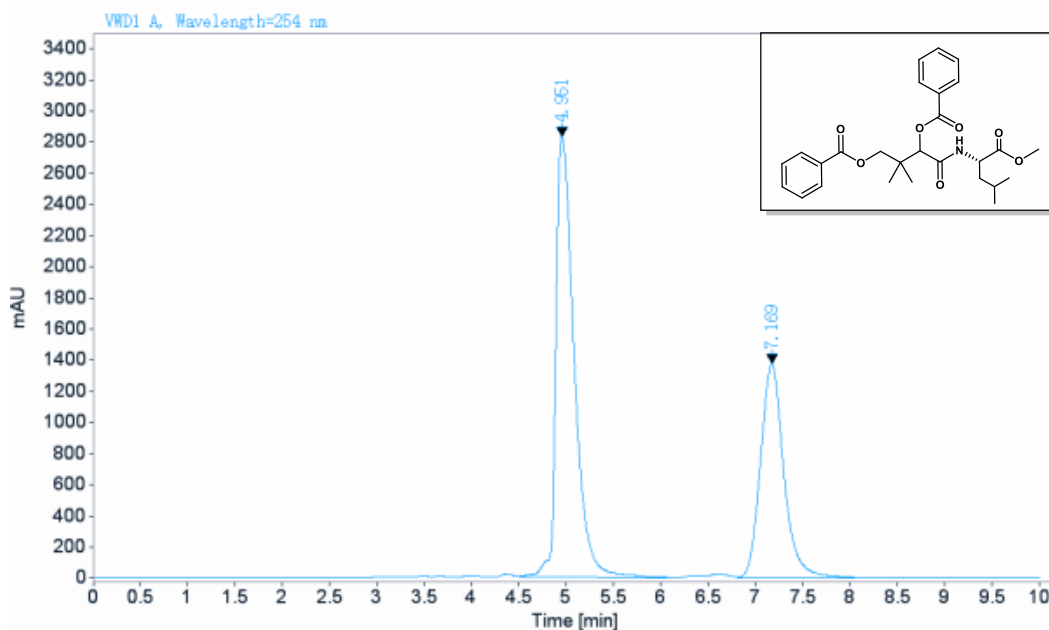

| RetTime[min] | Width[min] | Area       | Height[mAU] | Area% |
|--------------|------------|------------|-------------|-------|
| 4.951        | 0.2041     | 37862.7383 | 2829.5146   | 61.61 |
| 7.169        | 0.2612     | 23593.2578 | 1374.6018   | 38.39 |

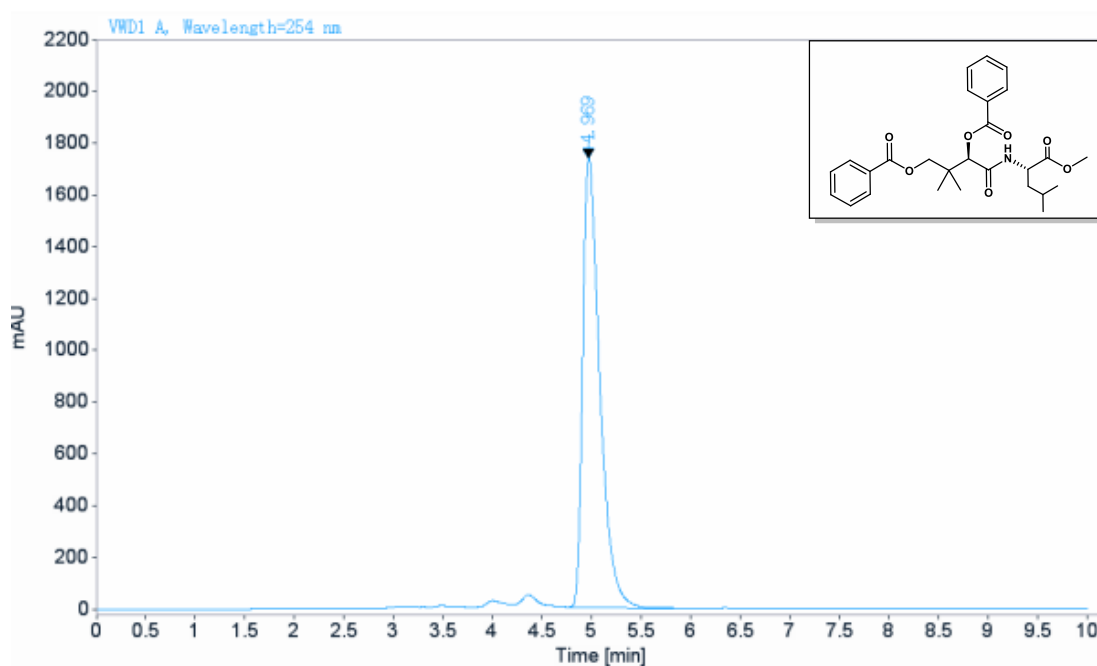

| RetTime[min] | Width[min] | Area       | Height[mAu] | Area%  |
|--------------|------------|------------|-------------|--------|
| 4.969        | 0.1823     | 20894.7109 | 1737.3409   | 100.00 |

The top spectrum is the chiral HPLC analysis of the benzoylated authentic standard **2e**, synthesized through NaBH<sub>4</sub>-mediated reduction of **1e** and benzoylation. The bottom spectrum is the chiral HPLC analysis of the benzoylated **2e**, synthesized through *E. coli* (pET28a-M3/pACYCDuet-1-GDH)-catalyzed reduction of **1e** and benzoylation.



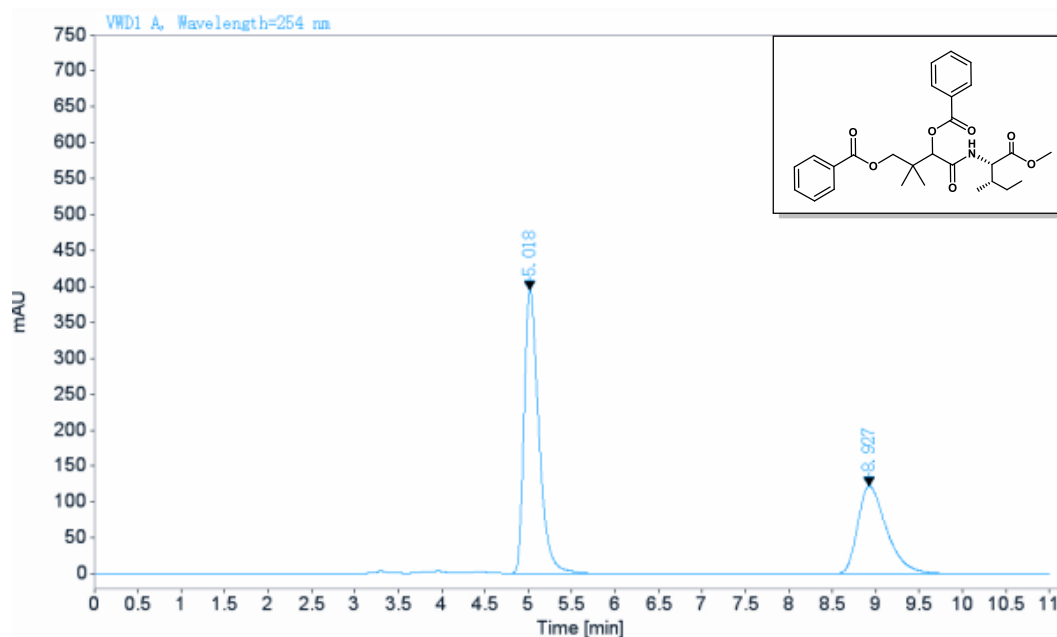

| RetTime[min] | Width[min] | Area      | Height[mAu] | Area% |
|--------------|------------|-----------|-------------|-------|
| 5.018        | 0.1808     | 4654.1616 | 393.9989    | 62.18 |
| 8.927        | 0.3550     | 2831.1252 | 121.8952    | 37.82 |

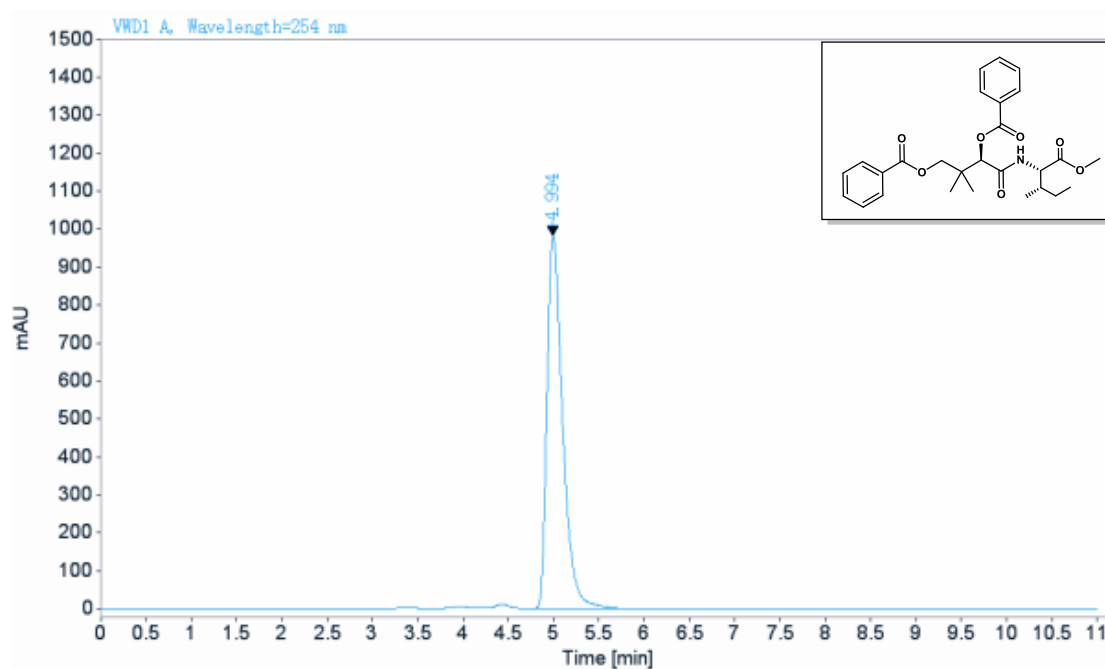

| RetTime[min] | Width[min] | Area       | Height[mAu] | Area%  |
|--------------|------------|------------|-------------|--------|
| 4.994        | 0.1830     | 11775.8584 | 981.4606    | 100.00 |

The top spectrum is the chiral HPLC analysis of the benzoylated authentic standard **2f**, synthesized through  $\text{NaBH}_4$ -mediated reduction of **1f** and benzoylation. The bottom spectrum is the chiral HPLC analysis of the benzoylated **2f**, synthesized through *E. coli* (pET28a-M3/pACYCDuet-1-GDH)-catalyzed reduction of **1f** and benzoylation.

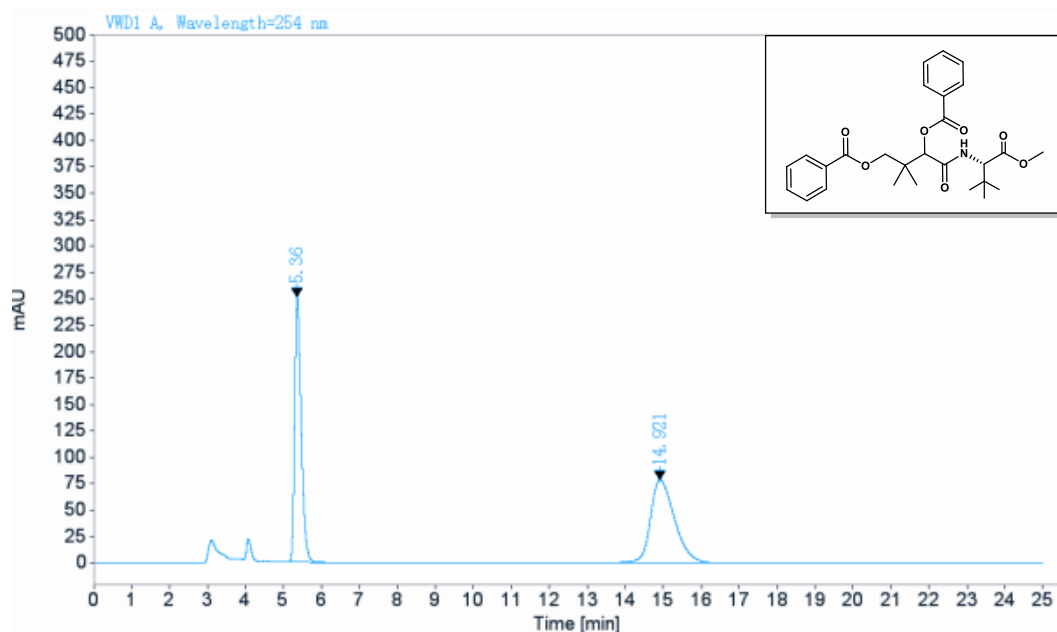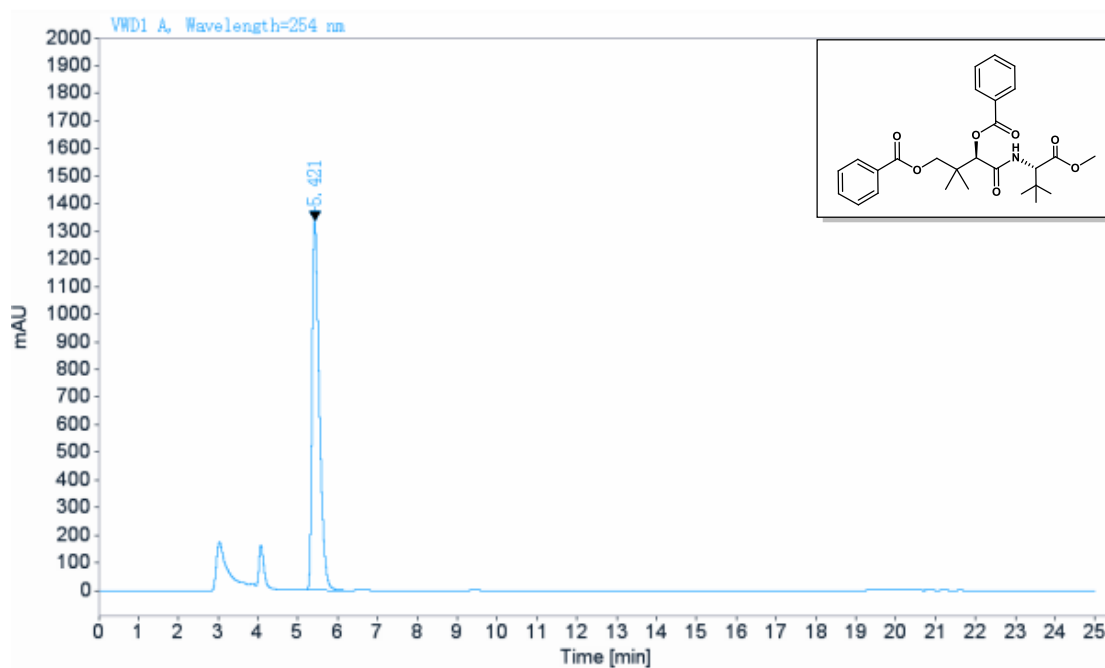

The top spectrum is the chiral HPLC analysis of the benzoylated authentic standard **2g**, synthesized through NaBH<sub>4</sub>-mediated reduction of **1g** and benzoylation. The bottom spectrum is the chiral HPLC analysis of the benzoylated **2g**, synthesized through *E. coli* (pET28a-M3/pACYCDuet-1-GDH)-catalyzed reduction of **1g** and benzoylation.

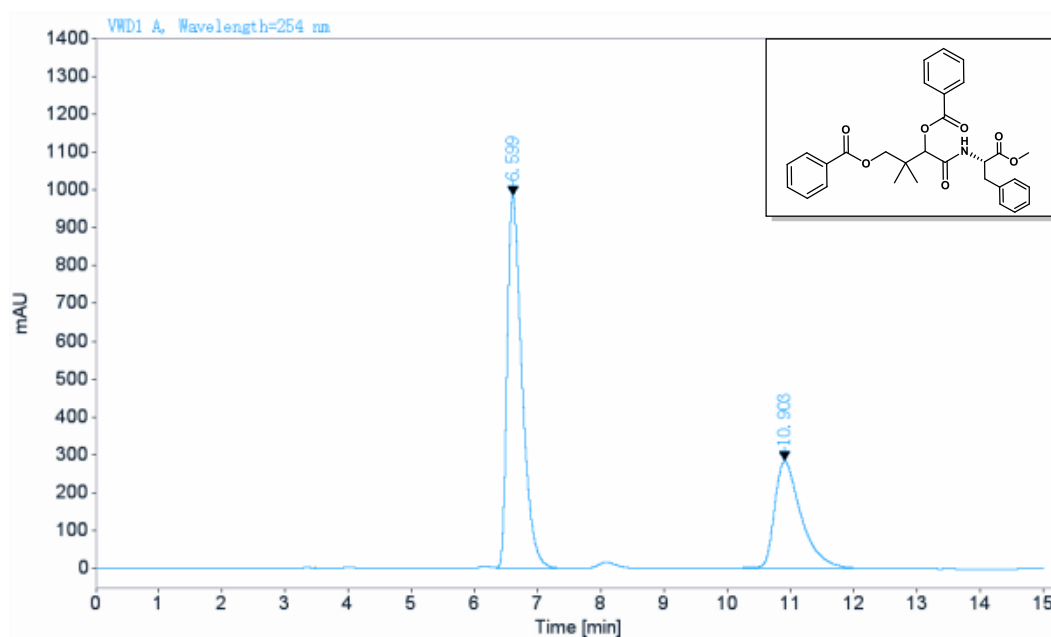

| RetTime[min] | Width[min] | Area       | Height[mAU] | Area% |
|--------------|------------|------------|-------------|-------|
| 6.599        | 0.2491     | 16052.2236 | 985.3956    | 65.59 |
| 10.903       | 0.4459     | 8422.7959  | 283.2592    | 34.41 |

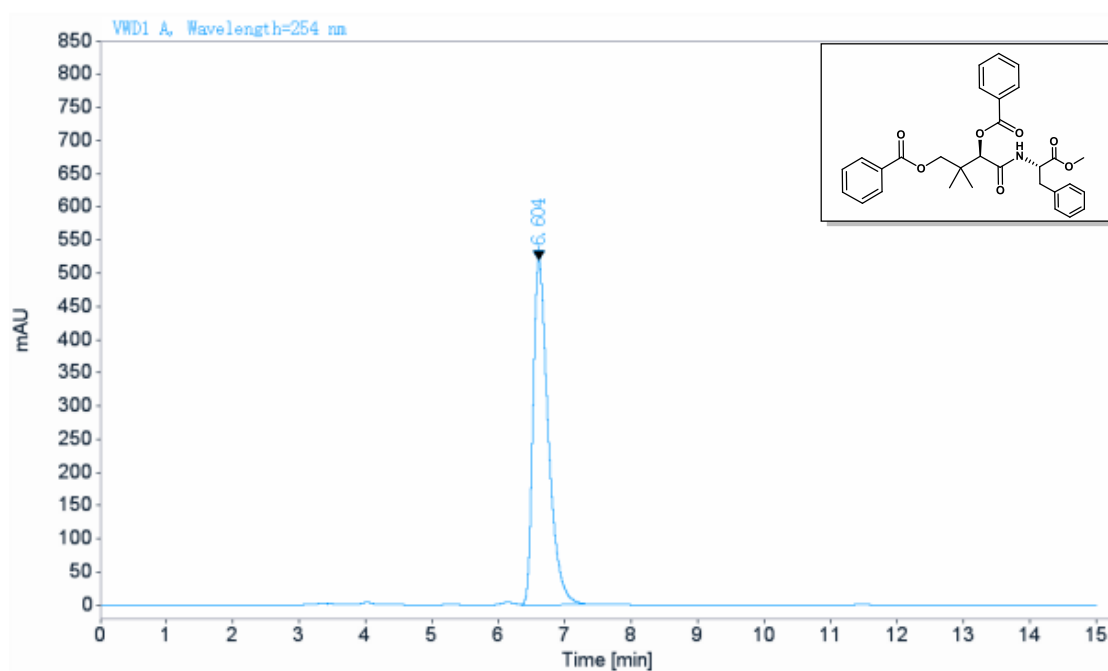

| RetTime[min] | Width[min] | Area      | Height[mAU] | Area%  |
|--------------|------------|-----------|-------------|--------|
| 6.604        | 0.2435     | 8287.2832 | 518.4904    | 100.00 |

The top spectrum is the chiral HPLC analysis of the benzoylated authentic standard **2h**, synthesized through NaBH<sub>4</sub>-mediated reduction of **1h** and benzoylation. The bottom spectrum is the chiral HPLC analysis of the benzoylated **2h**, synthesized through *E. coli* (pET28a-M3/pACYCDuet-1-GDH)-catalyzed reduction of **1h** and benzoylation.

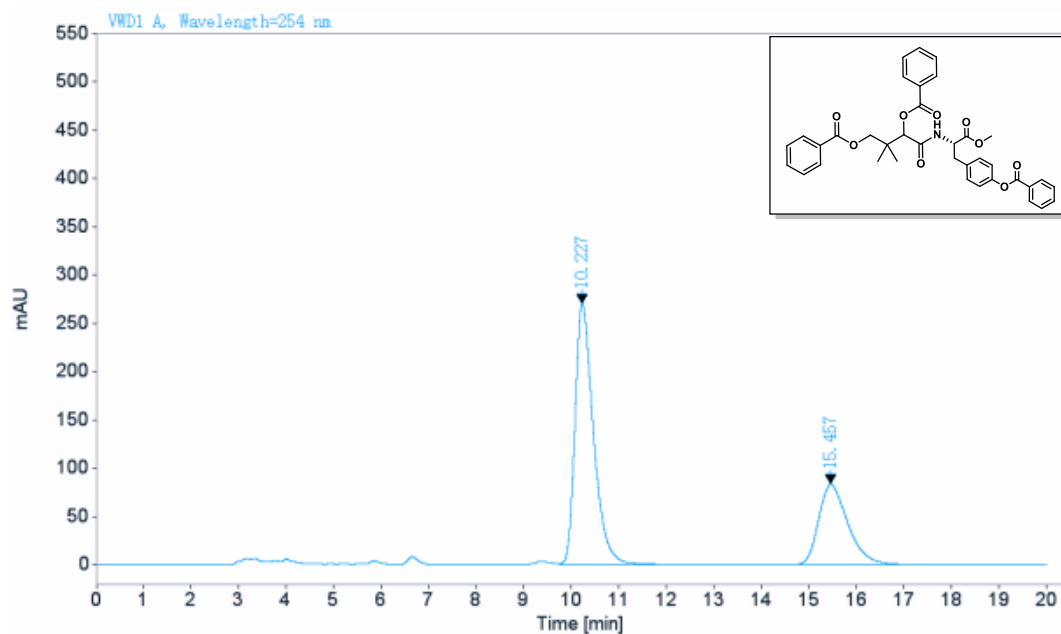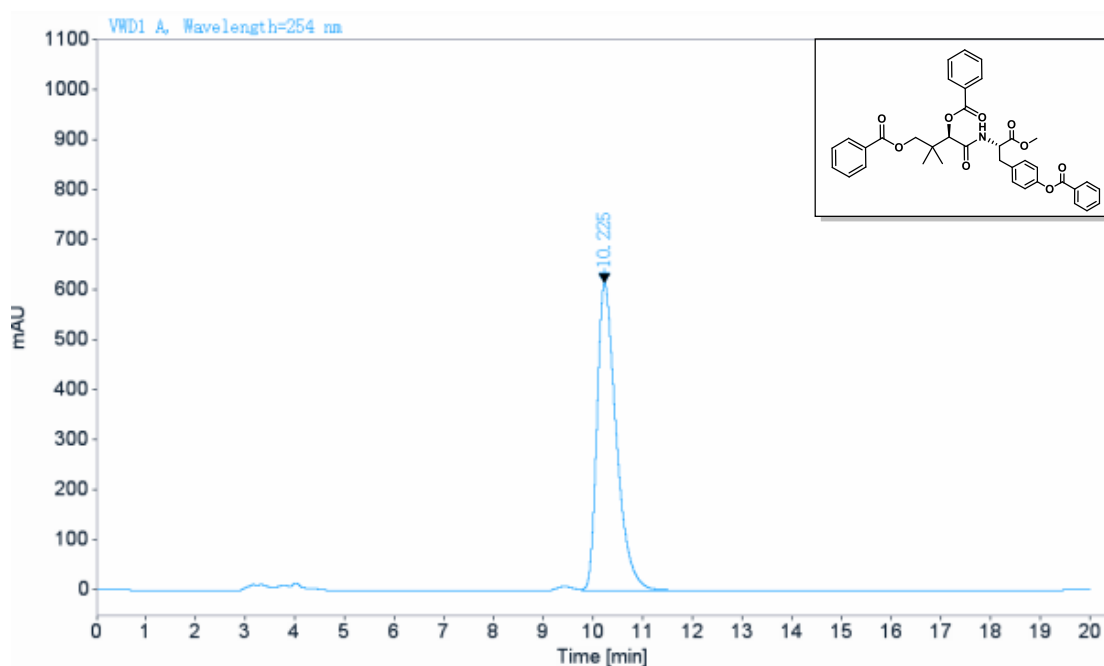

The top spectrum is the chiral HPLC analysis of the benzoylated authentic standard **2i**, synthesized through NaBH<sub>4</sub>-mediated reduction of **1i** and benzoylation. The bottom spectrum is the chiral HPLC analysis of the benzoylated **2i**, synthesized through *E. coli* (pET28a-M3/pACYCDuet-1-GDH)-catalyzed reduction of **1i** and benzoylation.

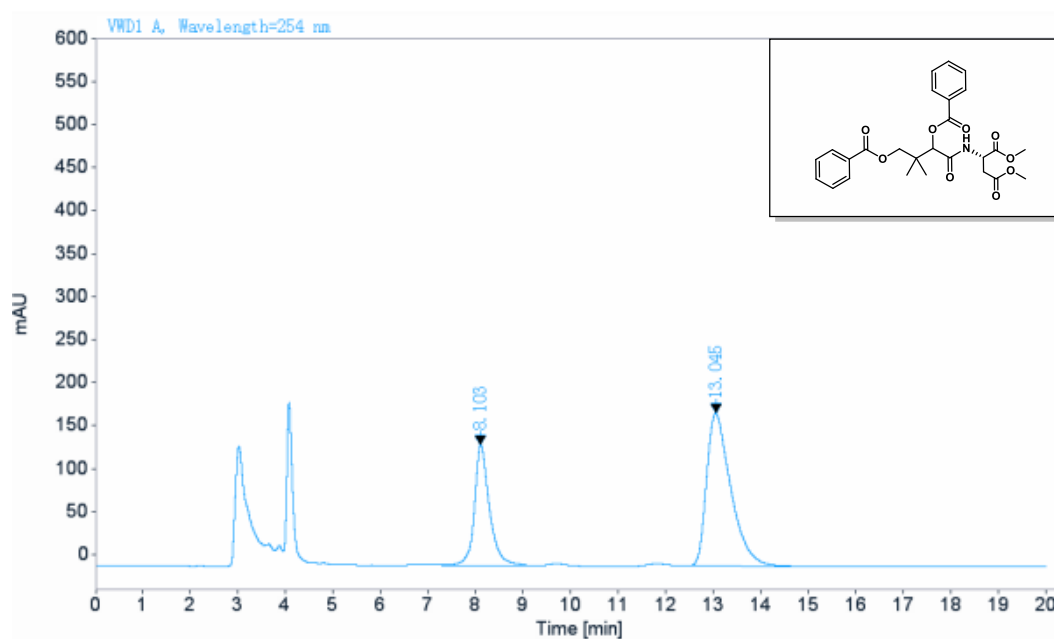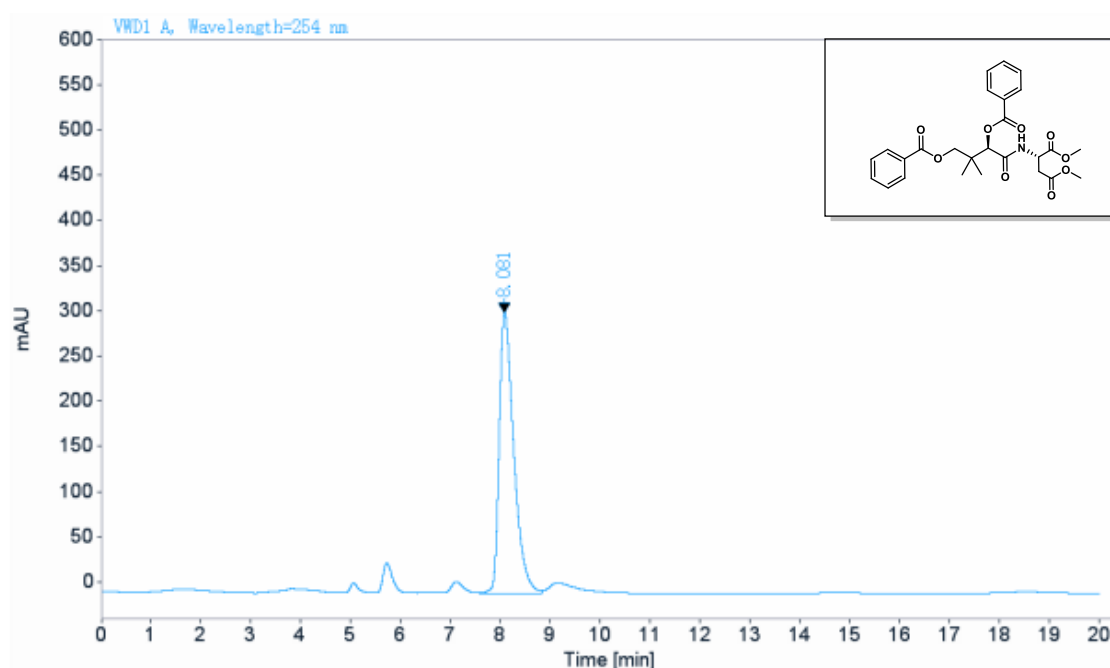

The top spectrum is the chiral HPLC analysis of the benzoylated authentic standard **2j**, synthesized through NaBH<sub>4</sub>-mediated reduction of **1j** and benzoylation. The bottom spectrum is the chiral HPLC analysis of the benzoylated **2j**, synthesized through *E. coli* (pET28a-M3/pACYCDuet-1-GDH)-catalyzed reduction of **1j** and benzoylation.

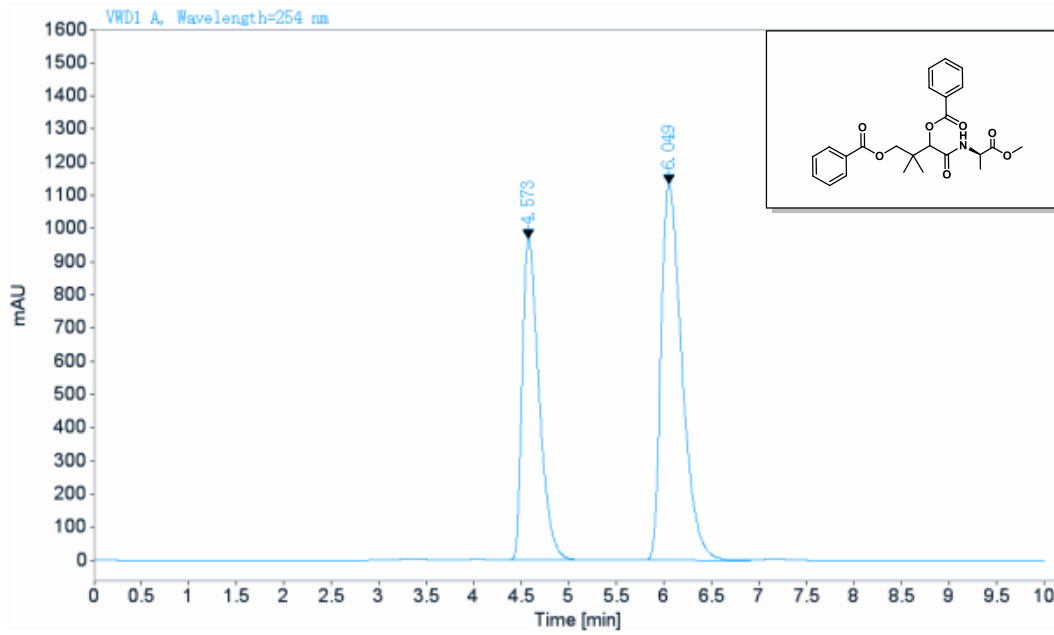

| RetTime[min] | Width[min] | Area       | Height[mAu] | Area% |
|--------------|------------|------------|-------------|-------|
| 4.573        | 0.1907     | 11910.0791 | 966.9980    | 40.75 |
| 6.049        | 0.2363     | 17320.4727 | 1133.4956   | 59.25 |

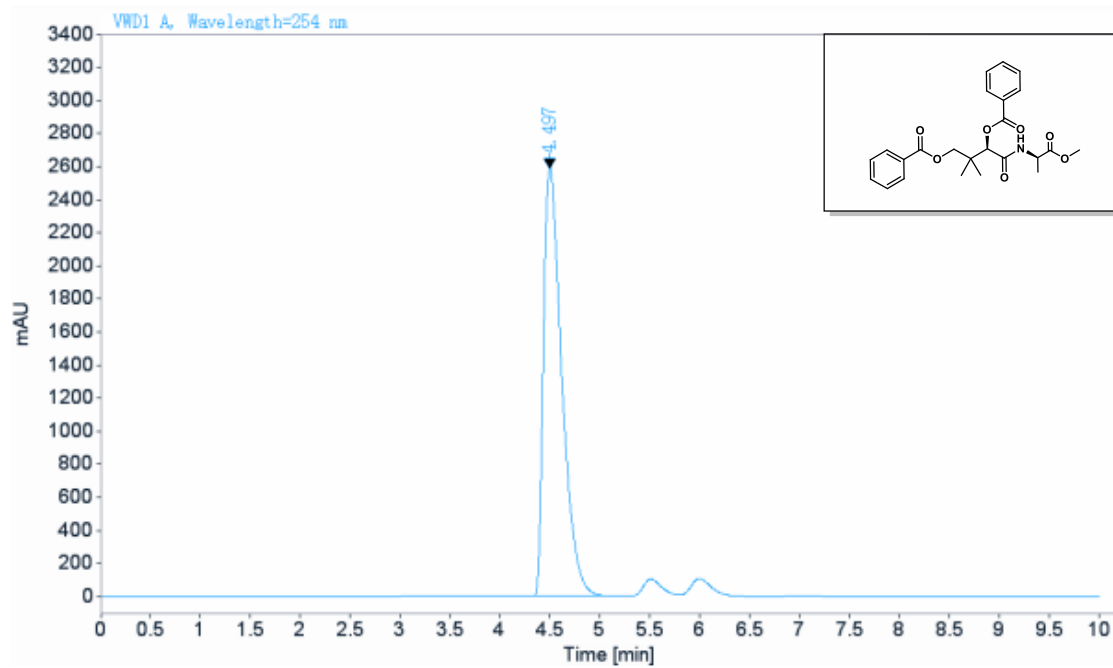

| RetTime[min] | Width[min] | Area       | Height[mAu] | Area%  |
|--------------|------------|------------|-------------|--------|
| 4.497        | 0.1951     | 33050.8438 | 2585.8528   | 100.00 |

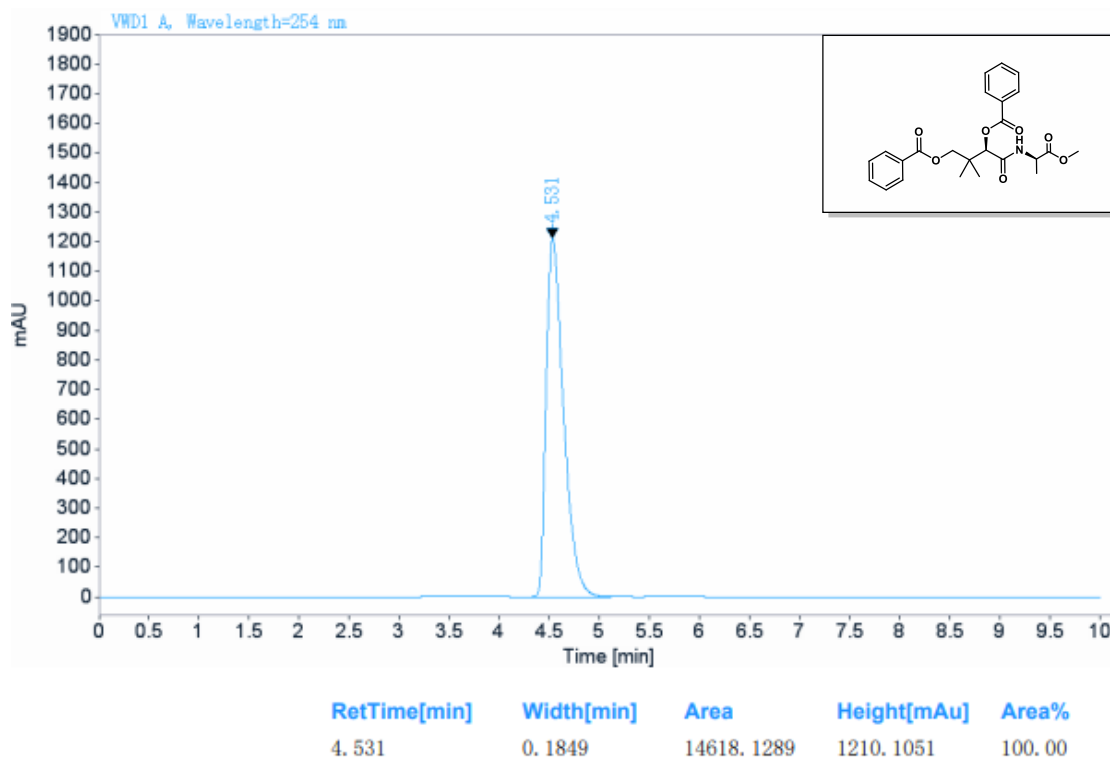

The top spectrum is the chiral HPLC analysis of the benzoylated authentic standard **2k**, synthesized through NaBH<sub>4</sub>-mediated reduction of **1k** and benzoylation. The middle spectrum is the chiral HPLC analysis of the benzoylated authentic standard **2k**, synthesized through the condensation between (*R*)-pantolactone with D-alanine methyl ester, followed by benzoylation. The bottom spectrum is the chiral HPLC analysis of the benzoylated **2k**, synthesized through *E. coli* (pET28a-M3/pACYCDuet-1-GDH)-catalyzed reduction of **1k** and benzoylation.
